# Supplementary material for: ceRNA crosstalk mediated by ncRNAs is a novel regulatory mechanism in fish sex determination and differentiation
Source: HighWire-hosted journal article supplement (doi:10.1101/gr.275962.121), 2022-08-01
Supplement: Supplemental_Table_S2-2.xlsx [file Supplemental_Table_S2-2.xlsx]

## Sheet: Supplementary Table S2
Table S2. Classification and distribution of lncRNAs in the Chinese tongue sole genome.
txID	gID	chrom	Strand	exonCount	txLen	txStart	txEnd	LocInfo
XR_523652.3	103399557	NW_007590156.1	-	3	422	16	627	Intergenic
XR_003049160.1	112486652	NW_007587387.1	-	2	668	79	856	Intergenic
XR_523687.2	103399715	NW_007594122.1	+	3	221	9	404	Intergenic
XR_523634.3	103399394	NW_007588110.1	+	4	344	1	793	Intergenic
XR_523695.2	103399735	NW_007594736.1	-	3	209	1	466	Intergenic
XR_001759831.2	107988198	NW_007587526.1	-	3	662	1	818	Intergenic
XR_003049155.1	112486646	NW_007586884.1	-	3	538	1	861	Intergenic
XR_003049201.1	112486728	NW_007595223.1	-	2	357	1	454	Intergenic
XR_003049205.1	112486738	NW_007598474.1	-	2	273	9	356	Intergenic
XR_003049113.1	103398974	NW_007585226.1	-	4	398	6552	7396	Intergenic
XR_523559.3	103398974	NW_007585226.1	-	3	692	6552	7401	Intergenic
XR_003049177.1	112486685	NW_007590885.1	-	2	291	57	600	Intergenic
XR_523682.2	103399683	NW_007593007.1	+	2	202	46	347	Intergenic
XR_003049134.1	112486619	NW_007585374.1	+	2	1000	63	1215	Intergenic
XR_523636.3	103399417	NW_007588371.1	-	3	294	44	765	Intergenic
XR_523643.3	103399481	NW_007589084.1	+	3	268	107	714	Intergenic
XR_523595.3	103399161	NW_007585937.1	-	3	787	84	1118	Intergenic
XR_003049178.1	112486689	NW_007591145.1	-	3	361	1	544	Intergenic
XR_003049147.1	112486632	NW_007586113.1	-	2	351	691	1135	Intergenic
XR_523692.1	103399722	NW_007594398.1	-	3	272	1	478	Intergenic
XR_003049196.1	112486720	NW_007594159.1	+	2	239	23	334	Intergenic
XR_003049158.1	112486649	NW_007586999.1	+	2	263	156	527	Intergenic
XR_003049173.1	112486679	NW_007590623.1	-	2	272	96	471	Intergenic
XR_521756.3	103381163	NC_024313.1	-	8	1142	11492374	11562170	Intergenic
XR_003050174.1	112487250	NC_024313.1	-	3	629	12296891	12299481	Antisense
XR_003050028.1	112487190	NC_024313.1	-	2	280	5218028	5218352	Intergenic
XR_003050159.1	112487238	NC_024313.1	-	2	1862	6518962	6521744	Antisense
XR_003050030.1	112487191	NC_024313.1	-	7	2884	6095666	6108452	Intergenic
XR_003050180.1	112487252	NC_024313.1	-	3	1802	4425359	4427529	Antisense
XR_003050092.1	112487213	NC_024313.1	-	2	1594	1934146	1935832	Intronic
XR_003050094.1	112487214	NC_024313.1	-	2	755	8099356	8100781	Antisense
XR_001760286.2	107988792	NC_024313.1	-	5	2332	11744954	11755005	Antisense
XR_001760288.2	107988793	NC_024313.1	-	2	1234	11749804	11751272	Intergenic
XR_003050024.1	103381098	NC_024313.1	-	12	1972	9755991	9781297	Antisense
XR_001760299.2	107988795	NC_024313.1	-	3	349	5866253	5869397	Antisense
XR_003050179.1	107988782	NC_024313.1	-	7	1367	4427648	4444621	Antisense
XR_003050199.1	112487266	NC_024313.1	-	1	221	13338159	13338379	Intronic
XR_003050193.1	107988794	NC_024313.1	-	4	674	5683316	5689733	Antisense
XR_003050163.1	112487240	NC_024313.1	-	2	1733	4937062	4938832	Intergenic
XR_521789.3	103381358	NC_024313.1	-	3	384	13715207	13716529	Antisense
XR_003050026.1	103381098	NC_024313.1	-	12	1258	9755991	9773361	Antisense
XR_003050164.1	112487241	NC_024313.1	-	8	1892	8782943	8799454	Antisense
XR_003050027.1	112487189	NC_024313.1	-	3	955	3702689	3706337	Intergenic
XR_003050160.1	103380834	NC_024313.1	-	4	2259	4915047	4950408	Intergenic
XR_003050154.1	103380820	NC_024313.1	-	3	828	4772698	4775751	Antisense
XR_003050033.1	112487191	NC_024313.1	-	5	1587	6099995	6108452	Intergenic
XR_521751.3	103381098	NC_024313.1	-	12	2017	9755991	9781297	Antisense
XR_003050035.1	112487191	NC_024313.1	-	6	2483	6098913	6108452	Intergenic
XR_001760303.2	103381098	NC_024313.1	-	12	2011	9755963	9781297	Antisense
XR_003050151.1	107988784	NC_024313.1	-	5	6467	10093944	10120815	Intergenic
XR_001760306.2	103381098	NC_024313.1	-	13	1853	9755991	9781297	Antisense
XR_003050201.1	112487268	NC_024313.1	-	1	221	13339478	13339698	Intronic
XR_001760308.2	103381098	NC_024313.1	-	11	1923	9755991	9781297	Antisense
XR_003050161.1	112487239	NC_024313.1	-	3	2761	4910244	4914309	Intergenic
XR_003050131.1	112487228	NC_024313.1	-	2	1608	886194	887946	Intronic
XR_003050064.1	112487202	NC_024313.1	-	3	245	12722235	12722837	Antisense
XR_003050034.1	112487191	NC_024313.1	-	8	2773	6095666	6108452	Intergenic
XR_001760307.2	103381098	NC_024313.1	-	13	1351	9755991	9780798	Antisense
XR_003050115.1	103381181	NC_024313.1	-	8	1905	11188790	11206009	Antisense
XR_001760304.2	103381098	NC_024313.1	-	11	1889	9755991	9781297	Antisense
XR_521731.2	103380919	NC_024313.1	-	4	1178	5961048	5965677	Intergenic
XR_521757.3	103381163	NC_024313.1	-	3	496	11492374	11538343	Intergenic
XR_003050170.1	112487246	NC_024313.1	-	2	8787	2389116	2398386	Intronic
XR_521702.3	103380646	NC_024313.1	-	6	1202	1175287	1184817	Antisense
XR_003050176.1	107988782	NC_024313.1	-	6	2116	4427648	4444508	Antisense
XR_003050200.1	112487267	NC_024313.1	-	1	221	13338848	13339068	Intronic
XR_001760250.2	107988777	NC_024313.1	-	2	586	5423643	5424287	Antisense
XR_003050040.1	103381163	NC_024313.1	-	4	632	11492374	11538343	Intergenic
XR_003050194.1	112487262	NC_024313.1	-	5	2891	4758204	4766753	Intergenic
XR_521722.3	103380834	NC_024313.1	-	5	577	4915047	4997405	Antisense
XR_003050177.1	107988782	NC_024313.1	-	6	1862	4427648	4444508	Antisense
XR_003050189.1	112487260	NC_024313.1	-	3	229	2310072	2311030	Intergenic
XR_003050165.1	103380711	NC_024313.1	-	3	1825	2713878	2716961	Antisense
XR_521713.3	103380730	NC_024313.1	-	3	546	3067532	3069087	Intergenic
XR_003050157.1	112487237	NC_024313.1	-	3	2497	4794467	4813487	Antisense
XR_003050101.1	112487216	NC_024313.1	-	2	1654	5956216	5958222	Antisense
XR_003050137.1	112487231	NC_024313.1	-	2	1687	5188764	5190587	Antisense
XR_003050162.1	112487239	NC_024313.1	-	3	2051	4910244	4915026	Intergenic
XR_003050150.1	107988784	NC_024313.1	-	4	6791	10093944	10120813	Intergenic
XR_003050158.1	103380919	NC_024313.1	-	5	1258	5961048	5965677	Intergenic
XR_003050167.1	112487244	NC_024313.1	-	2	422	2369820	2370859	Intergenic
XR_003050196.1	112487264	NC_024313.1	-	5	1008	4650062	4661632	Antisense
XR_003050181.1	112487252	NC_024313.1	-	3	1786	4425359	4427510	Antisense
XR_003050109.1	103380646	NC_024313.1	-	6	1234	1175284	1184817	Antisense
XR_003050178.1	107988782	NC_024313.1	-	7	1932	4427648	4444508	Antisense
XR_003050023.1	103381098	NC_024313.1	-	13	2100	9755991	9781297	Antisense
XR_003050156.1	112487237	NC_024313.1	-	3	1199	4794467	4801388	Antisense
XR_003050172.1	112487249	NC_024313.1	-	2	1324	1770986	1772389	Intergenic
XR_003050171.1	112487248	NC_024313.1	-	3	579	11563070	11565934	Intergenic
XR_003050018.1	112487186	NC_024313.1	-	2	1051	6164550	6180488	Antisense
XR_521719.3	103380824	NC_024313.1	-	3	282	4785308	4787204	Antisense
XR_003050108.1	103380646	NC_024313.1	-	7	1272	1175287	1184817	Antisense
XR_003050079.1	112487211	NC_024313.1	-	3	446	9898180	9899243	Antisense
XR_003050192.1	107988794	NC_024313.1	-	3	768	5683316	5689733	Antisense
XR_003050036.1	112487192	NC_024313.1	-	2	666	6093538	6095196	Intergenic
XR_003050025.1	103381098	NC_024313.1	-	10	1795	9755991	9781297	Antisense
XR_003050198.1	112487265	NC_024313.1	-	1	221	13340099	13340319	Intronic
XR_003050197.1	112487264	NC_024313.1	-	5	1081	4650062	4661675	Antisense
XR_003050032.1	112487191	NC_024313.1	-	8	3030	6095666	6108452	Intergenic
XR_003050091.1	112487212	NC_024313.1	-	3	1168	4891119	4893161	Intergenic
XR_003050031.1	112487191	NC_024313.1	-	7	3348	6095666	6108452	Intergenic
XR_003050078.1	112487210	NC_024313.1	+	2	1015	1124516	1125565	Intronic
XR_003050076.1	112487208	NC_024313.1	+	3	851	13407900	13411287	Intronic
XR_521706.3	103380675	NC_024313.1	+	7	2936	2160228	2179525	Intergenic
XR_003050166.1	112487243	NC_024313.1	+	2	2297	2697487	2706577	Intronic
XR_003050029.1	107988796	NC_024313.1	+	2	790	5218195	5219130	Intergenic
XR_003050016.1	112487184	NC_024313.1	+	2	3792	8443307	8447319	Intronic
XR_521786.3	103381312	NC_024313.1	+	6	1738	13074136	13087878	Antisense
XR_003050127.1	112487225	NC_024313.1	+	3	328	6230539	6249853	Antisense
XR_003050128.1	112487225	NC_024313.1	+	3	727	6230539	6249106	Intergenic
XR_001760278.2	107988788	NC_024313.1	+	3	607	1560164	1564611	Antisense
XR_003050184.1	112487255	NC_024313.1	+	3	770	8142870	8162811	Intergenic
XR_521767.3	103381219	NC_024313.1	+	3	519	12213635	12229618	Intergenic
XR_003050110.1	112487220	NC_024313.1	+	2	1146	1172344	1173975	Intergenic
XR_001760267.2	107988785	NC_024313.1	+	4	1679	6209129	6219154	Antisense
XR_521700.2	103380622	NC_024313.1	+	3	358	797646	798348	Sense
XR_003050132.1	103381208	NC_024313.1	+	12	5615	11798944	11845709	Intergenic
XR_003050075.1	112487207	NC_024313.1	+	3	1736	13450646	13453182	Antisense
XR_003050141.1	112487233	NC_024313.1	+	2	1102	4141675	4152997	Intergenic
XR_521708.3	103380685	NC_024313.1	+	8	1182	1855918	1870847	Antisense
XR_003050037.1	112487193	NC_024313.1	+	2	4759	4487765	4492554	Antisense
XR_521740.3	103380977	NC_024313.1	+	7	1818	6812846	6832742	Antisense
XR_521741.3	103380994	NC_024313.1	+	3	1189	7481755	7483317	Intergenic
XR_003050116.1	103380685	NC_024313.1	+	9	1347	1855918	1871213	Antisense
XR_003050017.1	112487185	NC_024313.1	+	2	3520	3564581	3568318	Intergenic
XR_001760276.2	107988787	NC_024313.1	+	2	1022	9569523	9570644	Intergenic
XR_003050022.1	112487188	NC_024313.1	+	2	556	7523674	7524516	Antisense
XR_521714.3	103380775	NC_024313.1	+	3	1494	4134575	4136296	Intergenic
XR_003050149.1	112487234	NC_024313.1	+	3	1226	8647018	8675431	Antisense
XR_003050071.1	112487203	NC_024313.1	+	3	3281	12474050	12479025	Intergenic
XR_521766.3	103381211	NC_024313.1	+	3	440	12109949	12117424	Antisense
XR_003050043.1	103380680	NC_024313.1	+	3	965	2034129	2040942	Antisense
XR_003050124.1	112487225	NC_024313.1	+	3	492	6230539	6250851	Antisense
XR_003050074.1	112487206	NC_024313.1	+	3	923	12434885	12450641	Antisense
XR_003050120.1	112487224	NC_024313.1	+	11	2577	6466054	6482407	Antisense
XR_003050041.1	112487194	NC_024313.1	+	3	3079	11501973	11505798	Intergenic
XR_003050063.1	103381312	NC_024313.1	+	6	788	13074136	13092109	Antisense
XR_003050169.1	112487245	NC_024313.1	+	2	1554	2878178	2879816	Intronic
XR_521770.3	103381247	NC_024313.1	+	4	426	12912987	12913921	Intergenic
XR_003050138.1	103380961	NC_024313.1	+	4	1656	6684736	6723487	Antisense
XR_003050122.1	112487224	NC_024313.1	+	10	2193	6467262	6482407	Antisense
XR_003050125.1	112487225	NC_024313.1	+	3	447	6230539	6261281	Antisense
XR_521785.3	103381312	NC_024313.1	+	6	2029	13074136	13087878	Antisense
XR_001760246.2	107988775	NC_024313.1	+	3	241	8731619	8732151	Intergenic
XR_003050190.1	112487261	NC_024313.1	+	5	4355	5390142	5400498	Antisense
XR_003050107.1	107988788	NC_024313.1	+	3	709	1560164	1562706	Antisense
XR_001760270.2	103380675	NC_024313.1	+	8	3076	2160228	2179525	Intergenic
XR_003050130.1	112487226	NC_024313.1	+	2	2323	140785	143733	Intergenic
XR_003050140.1	103381107	NC_024313.1	+	3	1020	10824326	10830311	Intergenic
XR_001760262.2	107988783	NC_024313.1	+	3	301	12122126	12124158	Antisense
XR_003050126.1	112487225	NC_024313.1	+	3	1150	6230539	6236163	Intergenic
XR_003050070.1	107988772	NC_024313.1	+	4	588	12870377	12879316	Antisense
XR_003050152.1	112487236	NC_024313.1	+	2	662	10089924	10090762	Antisense
XR_003050067.1	107988764	NC_024313.1	+	10	2955	13694351	13698494	Intergenic
XR_003050175.1	112487251	NC_024313.1	+	4	1459	3424749	3466075	Intergenic
XR_003050139.1	112487232	NC_024313.1	+	3	1964	6764105	6779260	Intronic
XR_001760253.2	107988779	NC_024313.1	+	4	1143	6928704	6932966	Intergenic
XR_003050111.1	112487221	NC_024313.1	+	3	724	6118152	6119878	Antisense
XR_003050100.1	112487215	NC_024313.1	+	2	1038	5896696	5899042	Antisense
XR_003050121.1	112487224	NC_024313.1	+	9	2645	6472465	6482407	Antisense
XR_003050187.1	103380977	NC_024313.1	+	6	1759	6812846	6832733	Antisense
XR_003050068.1	107988764	NC_024313.1	+	9	2875	13694351	13698494	Intergenic
XR_003050133.1	103381208	NC_024313.1	+	6	5086	11812847	11845709	Intergenic
XR_003050202.1	112487269	NC_024313.1	+	1	278	3064885	3065162	Intergenic
XR_003050195.1	112487263	NC_024313.1	+	2	237	10880677	10883737	Antisense
XR_521743.3	103381012	NC_024313.1	+	3	859	7726459	7737691	Antisense
XR_003050188.1	112487259	NC_024313.1	+	2	280	2311583	2311937	Intergenic
XR_001760255.2	103380977	NC_024313.1	+	8	1556	6812846	6832742	Antisense
XR_003050072.1	112487204	NC_024313.1	+	3	846	12693765	12694882	Antisense
XR_003050182.1	112487253	NC_024313.1	+	2	1340	4461127	4462509	Antisense
XR_003050069.1	107988764	NC_024313.1	+	11	2877	13694351	13698494	Intergenic
XR_003050112.1	112487221	NC_024313.1	+	3	589	6118152	6121051	Antisense
XR_003050042.1	112487195	NC_024313.1	+	2	708	6803108	6807798	Antisense
XR_003050113.1	103381088	NC_024313.1	+	5	625	9223747	9256520	Antisense
XR_521747.3	103381088	NC_024313.1	+	5	526	9223747	9256519	Antisense
XR_003050119.1	112487223	NC_024313.1	+	2	5729	3802776	3808620	Antisense
XR_001760254.2	103380977	NC_024313.1	+	7	1838	6812846	6832742	Antisense
XR_003049092.1	112486589	NW_007585158.1	-	2	1670	36214	39063	Intergenic
XR_001759828.2	103399290	NW_007587008.1	-	2	426	1	869	Intergenic
XR_523693.3	103399730	NW_007594642.1	+	3	234	1	465	Intergenic
XR_523680.2	103399675	NW_007592735.1	-	3	261	2	529	Intergenic
XR_523632.3	103399392	NW_007588094.1	-	3	400	56	649	Intergenic
XR_003049194.1	112486718	NW_007593929.1	+	2	278	100	463	Intergenic
XR_523603.3	103399218	NW_007586398.1	+	3	817	28	1047	Intergenic
XR_523700.3	103399746	NW_007595167.1	-	3	251	16	456	Intergenic
XR_523689.3	103399719	NW_007594354.1	-	3	313	1	473	Intergenic
XR_523622.2	103399310	NW_007587168.1	-	4	429	30	800	Intergenic
XR_523604.3	103399220	NW_007586402.1	+	4	529	22	1051	Intergenic
XR_523628.2	103399365	NW_007587851.1	+	2	305	100	481	Intergenic
XR_523596.2	103399162	NW_007585955.1	-	3	325	7	930	Intergenic
XR_523618.3	103399297	NW_007587050.1	-	3	506	20	900	Intergenic
XR_523702.3	103399756	NW_007595674.1	+	3	236	1	419	Intergenic
XR_523706.3	103399780	NW_007597771.1	+	3	206	1	385	Intergenic
XR_003049190.1	112486713	NW_007593388.1	-	3	276	7	451	Intergenic
XR_523673.3	103399637	NW_007591870.1	+	3	361	1	553	Intergenic
XR_003049162.1	112486658	NW_007587631.1	-	2	314	296	728	Intergenic
XR_523600.3	103399198	NW_007586241.1	+	3	306	161	643	Intergenic
XR_003049121.1	112486611	NW_007585278.1	-	3	496	2503	4109	Intergenic
XR_001759821.2	107988160	NW_007585635.1	+	6	748	8	1583	Intergenic
XR_003049157.1	112486648	NW_007586963.1	-	3	541	7	927	Intergenic
XR_003049087.1	112486582	NW_007585142.1	-	3	2371	25261	49142	Intergenic
XR_523691.2	103399721	NW_007594364.1	+	3	252	1	438	Intergenic
XR_003049163.1	112486659	NW_007587873.1	-	2	399	258	794	Intergenic
XR_523551.3	103398925	NW_007585164.1	+	5	6937	64	21071	Antisense
XR_001759808.2	103398925	NW_007585164.1	+	5	6934	64	21071	Antisense
XR_003049495.1	112486917	NC_024310.1	-	2	2424	4668322	4676678	Antisense
XR_003049647.1	112486990	NC_024310.1	-	3	1757	686390	699301	Intergenic
XR_003049492.1	112486914	NC_024310.1	-	5	4607	17680245	17690547	Intergenic
XR_003049600.1	112486960	NC_024310.1	-	3	778	7500299	7503073	Intergenic
XR_003049489.1	107988508	NC_024310.1	-	5	3284	1932076	1942907	Intergenic
XR_003049604.1	112486966	NC_024310.1	-	2	1119	10162855	10164603	Intronic
XR_521435.3	103377673	NC_024310.1	-	4	2354	1974784	1980940	Antisense
XR_003049555.1	112486941	NC_024310.1	-	3	1520	18962039	18966976	Intergenic
XR_003049477.1	112486906	NC_024310.1	-	4	1664	11078312	11085631	Antisense
XR_521514.2	103378469	NC_024310.1	-	3	1004	17154576	17157751	Antisense
XR_003049557.1	112486943	NC_024310.1	-	2	226	18187497	18187762	Intergenic
XR_003049472.1	112486904	NC_024310.1	-	3	448	14247910	14248632	Antisense
XR_003049618.1	107988480	NC_024310.1	-	8	1902	1071488	1100365	Intergenic
XR_003049617.1	107988480	NC_024310.1	-	7	1377	1072282	1100365	Intergenic
XR_003049621.1	112486978	NC_024310.1	-	3	1278	14777356	14787813	Antisense
XR_003049486.1	107988508	NC_024310.1	-	5	3524	1932076	1942509	Intergenic
XR_001760001.2	107988508	NC_024310.1	-	5	2034	1932272	1939701	Intergenic
XR_001759983.2	107988498	NC_024310.1	-	4	557	13658916	13660397	Intergenic
XR_003049614.1	112486974	NC_024310.1	-	4	1574	16647929	16652316	Intergenic
XR_003049471.1	112486903	NC_024310.1	-	4	792	14249163	14250522	Antisense
XR_003049482.1	112486909	NC_024310.1	-	3	881	12131559	12135435	Intergenic
XR_003049643.1	112486987	NC_024310.1	-	5	3140	6551709	6555401	Intergenic
XR_003049470.1	112486902	NC_024310.1	-	3	5307	11907872	11913871	Intergenic
XR_003049479.1	103378098	NC_024310.1	-	5	578	11571690	11573741	Antisense
XR_003049626.1	112486980	NC_024310.1	-	2	1654	12655956	12657644	Intronic
XR_003049485.1	107988508	NC_024310.1	-	5	4621	1932076	1942509	Intergenic
XR_001760017.2	107988518	NC_024310.1	-	2	1351	11071102	11072784	Antisense
XR_003049606.1	112486968	NC_024310.1	-	2	393	2220258	2220741	Intergenic
XR_001760015.2	107988517	NC_024310.1	-	5	2210	18811384	18824035	Antisense
XR_521474.3	103378082	NC_024310.1	-	7	2949	10911325	10926985	Antisense
XR_003049585.1	112486957	NC_024310.1	-	3	599	17292051	17293766	Antisense
XR_001760003.2	107988509	NC_024310.1	-	3	548	19914719	19915577	Intronic
XR_003049627.1	112486983	NC_024310.1	-	3	654	6010731	6030027	Intergenic
XR_521475.3	103378098	NC_024310.1	-	4	693	11571690	11573694	Antisense
XR_001759956.2	107988483	NC_024310.1	-	3	1135	379568	464533	Intergenic
XR_003049484.1	107988508	NC_024310.1	-	5	3016	1932076	1940435	Intergenic
XR_003049494.1	112486916	NC_024310.1	-	2	2364	10494807	10497220	Antisense
XR_003049537.1	112486935	NC_024310.1	-	2	8186	17661961	17677041	Intergenic
XR_521444.1	103377769	NC_024310.1	-	4	450	5134041	5136270	Intergenic
XR_003049475.1	107988501	NC_024310.1	-	4	1530	4701682	4707070	Intergenic
XR_001759937.2	103377578	NC_024310.1	-	6	1201	639096	667983	Intergenic
XR_001759965.1	107988487	NC_024310.1	-	3	313	4912813	4917515	Intergenic
XR_003049521.1	103377811	NC_024310.1	-	3	1709	6088532	6132842	Antisense
XR_003049646.1	112486989	NC_024310.1	-	2	1774	18291370	18295584	Intronic
XR_521493.2	103378305	NC_024310.1	-	3	770	14242556	14247493	Antisense
XR_003049474.1	107988501	NC_024310.1	-	3	1310	4701682	4705471	Intergenic
XR_003049586.1	103378241	NC_024310.1	-	5	3830	13866192	13939544	Intergenic
XR_003049561.1	112486946	NC_024310.1	-	3	426	7306313	7307306	Antisense
XR_003049488.1	107988508	NC_024310.1	-	5	3244	1932076	1942509	Intergenic
XR_003049637.1	112486985	NC_024310.1	-	5	570	9754112	9762219	Intergenic
XR_003049497.1	112486919	NC_024310.1	-	2	2944	4550276	4553315	Intronic
XR_001760014.2	107988516	NC_024310.1	-	3	620	18829169	18834854	Intergenic
XR_003049487.1	107988508	NC_024310.1	-	5	2475	1932261	1940170	Intergenic
XR_003049587.1	103378241	NC_024310.1	-	4	3747	13866177	13939544	Intergenic
XR_001759954.2	107988480	NC_024310.1	-	7	1373	1072282	1100365	Intergenic
XR_001759936.2	103377578	NC_024310.1	-	4	855	639096	660407	Intergenic
XR_003049480.1	112486908	NC_024310.1	-	2	262	11512302	11513434	Antisense
XR_001759968.2	107988490	NC_024310.1	-	3	1512	6491728	6496053	Intergenic
XR_003049608.1	112486972	NC_024310.1	-	2	230	16846623	16846896	Antisense
XR_003049556.1	112486942	NC_024310.1	-	2	543	19002619	19003208	Antisense
XR_003049483.1	112486910	NC_024310.1	-	2	7058	1776686	1783791	Intronic
XR_003049491.1	112486913	NC_024310.1	-	4	282	17765483	17780158	Antisense
XR_003049473.1	112486905	NC_024310.1	-	3	271	4693838	4698627	Intergenic
XR_003049624.1	107988478	NC_024310.1	-	3	1723	21064	24553	Intergenic
XR_521428.2	103377578	NC_024310.1	-	3	389	639096	650954	Intergenic
XR_003049546.1	103378159	NC_024310.1	+	7	2475	12994601	13089619	Intergenic
XR_003049498.1	112486920	NC_024310.1	+	2	3390	4432166	4435599	Intronic
XR_003049511.1	112486922	NC_024310.1	+	7	1693	15637397	15644249	Antisense
XR_003049490.1	112486912	NC_024310.1	+	2	1155	1918500	1923940	Antisense
XR_003049554.1	112486940	NC_024310.1	+	2	575	16425836	16426516	Intergenic
XR_003049522.1	103378269	NC_024310.1	+	4	1452	14680411	14692401	Antisense
XR_003049615.1	112486975	NC_024310.1	+	3	764	11481142	11485197	Antisense
XR_003049504.1	103377958	NC_024310.1	+	9	6774	8587591	8625722	Intergenic
XR_003049506.1	103378369	NC_024310.1	+	12	3577	15590344	15613092	Antisense
XR_003049501.1	103377958	NC_024310.1	+	11	7855	8568605	8625722	Antisense
XR_521513.3	103378420	NC_024310.1	+	4	758	16516394	16520075	Intergenic
XR_003049640.1	112486986	NC_024310.1	+	3	3255	848242	852486	Antisense
XR_003049641.1	112486986	NC_024310.1	+	2	3096	848230	852486	Antisense
XR_003049584.1	112486956	NC_024310.1	+	3	782	17458593	17460824	Antisense
XR_003049639.1	112486986	NC_024310.1	+	3	3347	848233	852486	Antisense
XR_521512.3	103378420	NC_024310.1	+	4	723	16516403	16520075	Intergenic
XR_003049642.1	112486986	NC_024310.1	+	3	3435	848233	852486	Antisense
XR_003049575.1	107988486	NC_024310.1	+	4	1280	4928270	5030488	Intergenic
XR_003049552.1	103378174	NC_024310.1	+	10	3705	12711000	12784777	Antisense
XR_003049519.1	112486923	NC_024310.1	+	3	4771	6637690	6643736	Intronic
XR_003049525.1	112486925	NC_024310.1	+	3	574	1586924	1590358	Intronic
XR_003049505.1	103377959	NC_024310.1	+	4	1968	8533665	8567558	Antisense
XR_003049594.1	107988504	NC_024310.1	+	4	1886	6246232	6267716	Antisense
XR_003049636.1	112486984	NC_024310.1	+	2	1152	18193258	18196564	Intergenic
XR_003049541.1	112486936	NC_024310.1	+	3	353	14329186	14329738	Antisense
XR_003049572.1	107988513	NC_024310.1	+	13	3663	1040928	1052027	Antisense
XR_003049573.1	107988513	NC_024310.1	+	10	3369	1040928	1052027	Antisense
XR_521455.3	103377874	NC_024310.1	+	7	1695	7292307	7297923	Intergenic
XR_001759964.2	107988486	NC_024310.1	+	3	1222	4928273	5002745	Intergenic
XR_003049560.1	112486945	NC_024310.1	+	3	1501	11168187	11173930	Intergenic
XR_003049549.1	103378174	NC_024310.1	+	10	4826	12711000	12784779	Antisense
XR_003049651.1	112486993	NC_024310.1	+	1	278	11959526	11959803	Intronic
XR_003049567.1	107988513	NC_024310.1	+	14	3319	1040907	1052027	Antisense
XR_003049616.1	112486976	NC_024310.1	+	3	2771	5566101	5571278	Antisense
XR_521483.3	103378159	NC_024310.1	+	6	2360	12994601	13089619	Intergenic
XR_003049533.1	112486929	NC_024310.1	+	2	324	991687	992296	Intergenic
XR_003049550.1	103378174	NC_024310.1	+	9	4728	12711000	12784779	Antisense
XR_521470.3	103378050	NC_024310.1	+	3	765	10878616	10880345	Intergenic
XR_003049502.1	103377958	NC_024310.1	+	12	6517	8568605	8625722	Antisense
XR_003049512.1	112486922	NC_024310.1	+	4	441	15642889	15644249	Antisense
XR_003049570.1	107988513	NC_024310.1	+	13	4339	1040928	1052027	Antisense
XR_521453.3	103377838	NC_024310.1	+	3	5250	6514200	6519637	Intergenic
XR_003049603.1	112486965	NC_024310.1	+	2	663	7145286	7145992	Antisense
XR_521466.3	103377959	NC_024310.1	+	4	892	8533665	8568190	Antisense
XR_003049583.1	112486955	NC_024310.1	+	2	687	17288642	17289449	Intergenic
XR_521486.2	103378223	NC_024310.1	+	2	348	14209762	14210418	Intergenic
XR_003049509.1	103378372	NC_024310.1	+	3	567	15587944	15590215	Antisense
XR_003049507.1	103378369	NC_024310.1	+	14	5006	15590344	15613092	Antisense
XR_001759953.2	107988479	NC_024310.1	+	6	2964	12934384	12970565	Intergenic
XR_001759969.2	103378369	NC_024310.1	+	13	3777	15590344	15613092	Antisense
XR_003049540.1	103377629	NC_024310.1	+	4	3633	1638520	1643998	Antisense
XR_001760006.2	107988513	NC_024310.1	+	14	3338	1040928	1052027	Antisense
XR_003049623.1	112486979	NC_024310.1	+	4	558	12437320	12441214	Intergenic
XR_521438.3	103377714	NC_024310.1	+	7	1287	2451866	2459302	Antisense
XR_003049595.1	103377736	NC_024310.1	+	4	3054	4116508	4176140	Intergenic
XR_003049534.1	112486931	NC_024310.1	+	5	1537	16873674	16878956	Antisense
XR_001759939.2	107988475	NC_024310.1	+	2	1382	2572170	2573599	Intergenic
XR_003049565.1	107988513	NC_024310.1	+	14	3330	1040907	1052027	Antisense
XR_003049619.1	112486977	NC_024310.1	+	2	2970	10220748	10223835	Intergenic
XR_003049523.1	112486924	NC_024310.1	+	2	1250	14669619	14671414	Antisense
XR_003049638.1	112486986	NC_024310.1	+	2	3566	848234	852486	Antisense
XR_003049569.1	107988513	NC_024310.1	+	14	3481	1040928	1052027	Antisense
XR_001759984.2	103377958	NC_024310.1	+	11	5513	8568605	8625722	Antisense
XR_003049535.1	112486931	NC_024310.1	+	6	1121	16873674	16878956	Antisense
XR_003049545.1	112486939	NC_024310.1	+	5	725	2114808	2116561	Antisense
XR_003049622.1	107988479	NC_024310.1	+	5	3337	12934384	12970565	Intergenic
XR_003049650.1	112486992	NC_024310.1	+	1	272	11957031	11957302	Sense
XR_521471.3	103378050	NC_024310.1	+	3	789	10878615	10880345	Intergenic
XR_003049574.1	107988486	NC_024310.1	+	4	1077	4928311	5002745	Intergenic
XR_003049568.1	107988513	NC_024310.1	+	14	3470	1040928	1052027	Antisense
XR_003049562.1	107988513	NC_024310.1	+	13	3666	1040928	1052027	Antisense
XR_003049558.1	112486944	NC_024310.1	+	2	18354	10806837	10825268	Intronic
XR_521503.3	103378374	NC_024310.1	+	3	407	15580084	15587704	Antisense
XR_003049625.1	103377956	NC_024310.1	+	3	1139	8439404	8448355	Intergenic
XR_003049551.1	103378174	NC_024310.1	+	10	4830	12711000	12784779	Antisense
XR_003049593.1	112486958	NC_024310.1	+	2	846	8065576	8066515	Antisense
XR_003049566.1	107988513	NC_024310.1	+	13	3486	1040928	1052027	Antisense
XR_521462.3	103377956	NC_024310.1	+	4	4228	8439404	8457596	Intergenic
XR_003049597.1	103377736	NC_024310.1	+	4	3005	4116508	4202158	Intergenic
XR_521519.3	103378557	NC_024310.1	+	5	751	19393658	19395061	Intergenic
XR_003049571.1	107988513	NC_024310.1	+	13	3661	1040928	1052027	Antisense
XR_003049493.1	112486915	NC_024310.1	+	2	623	19355324	19356050	Intronic
XR_521499.3	103378369	NC_024310.1	+	12	3562	15590344	15613092	Antisense
XR_003049530.1	112486926	NC_024310.1	+	4	7739	5167558	5175465	Intronic
XR_003049539.1	103377629	NC_024310.1	+	5	1042	1640028	1643998	Antisense
XR_003049596.1	103377736	NC_024310.1	+	4	3411	4116508	4185515	Intergenic
XR_003049598.1	112486959	NC_024310.1	+	2	496	5422478	5423023	Sense
XR_003049503.1	103377958	NC_024310.1	+	9	6631	8588217	8625722	Intergenic
XR_003049553.1	103378174	NC_024310.1	+	9	3995	12711000	12785279	Antisense
XR_003049536.1	112486932	NC_024310.1	+	3	266	16879028	16880569	Antisense
XR_003049564.1	107988513	NC_024310.1	+	13	3515	1040907	1052027	Antisense
XR_521491.3	103378269	NC_024310.1	+	4	744	14679880	14692401	Antisense
XR_003049508.1	103378369	NC_024310.1	+	12	3433	15590381	15613092	Antisense
XR_003049576.1	112486947	NC_024310.1	+	2	1916	3812311	3815239	Antisense
XR_003049544.1	112486938	NC_024310.1	+	2	980	2109052	2110260	Antisense
XR_521440.3	103377736	NC_024310.1	+	4	3277	4116508	4163229	Intergenic
XR_003049563.1	107988513	NC_024310.1	+	14	3857	1040928	1052027	Antisense
XR_001759942.2	103377736	NC_024310.1	+	4	3769	4116508	4161535	Intergenic
XR_003049524.1	112486925	NC_024310.1	+	3	569	1586924	1590358	Intronic
XR_003049520.1	112486923	NC_024310.1	+	3	4790	6637690	6643736	Intronic
XR_003049547.1	103378159	NC_024310.1	+	6	1570	12972425	13089619	Intergenic
XR_521481.3	103378159	NC_024310.1	+	6	1715	12994601	13066832	Intergenic
XR_003049577.1	112486948	NC_024310.1	+	2	1747	6235580	6237409	Intergenic
XR_001759993.2	107988504	NC_024310.1	+	4	1060	6254830	6267716	Antisense
XR_523597.3	103399166	NW_007585992.1	+	3	438	380	1198	Intergenic
XR_523631.2	103399387	NW_007588038.1	+	3	239	11	771	Intergenic
XR_001759819.2	107988154	NW_007585499.1	-	3	536	939	1864	Intergenic
XR_003048995.1	112486540	NW_007585111.1	-	3	597	3533	7712	Antisense
XR_003048997.1	112486543	NW_007585111.1	-	2	2110	241080	243710	Intergenic
XR_003048996.1	112486541	NW_007585111.1	-	2	5023	99958	105011	Intronic
XR_003049202.1	112486731	NW_007595618.1	+	2	240	43	380	Intergenic
XR_523539.3	103398838	NW_007585131.1	-	4	835	1400	49863	Antisense
XR_523540.3	103398838	NW_007585131.1	-	4	711	1400	49863	Antisense
XR_003049145.1	112486630	NW_007585994.1	+	2	275	274	1224	Intergenic
XR_003049185.1	112486700	NW_007591972.1	+	2	254	123	472	Intergenic
XR_003049203.1	112486734	NW_007596637.1	-	2	271	15	357	Intergenic
XR_523637.3	103399419	NW_007588387.1	+	3	302	107	742	Intergenic
XR_523563.3	103398982	NW_007585233.1	+	3	473	1	1180	Intergenic
XR_003049074.1	112486270	NW_007585130.1	-	3	1431	52490	54482	Intergenic
XR_003049078.1	107988129	NW_007585130.1	-	4	626	34045	36750	Antisense
XR_001759797.2	103398827	NW_007585130.1	-	5	1211	54498	59138	Intergenic
XR_003049073.1	112486270	NW_007585130.1	-	2	1506	52490	54456	Intergenic
XR_003049077.1	107988129	NW_007585130.1	-	5	738	34045	36752	Antisense
XR_003049076.1	103398825	NW_007585130.1	-	4	403	59757	65565	Intergenic
XR_003049075.1	103398827	NW_007585130.1	-	5	3034	54498	59160	Intergenic
XR_523537.3	103398827	NW_007585130.1	-	5	1795	54498	59058	Intergenic
XR_523538.3	103398832	NW_007585130.1	+	4	1249	143532	145710	Intergenic
XR_001759814.2	107988143	NW_007585314.1	+	2	2224	410	2890	Intergenic
XR_003049102.1	112486593	NW_007585168.1	+	3	1112	20690	28345	Intergenic
XR_003049101.1	112486593	NW_007585168.1	+	3	1126	20690	30703	Intergenic
XR_003049200.1	112486726	NW_007594641.1	-	3	289	1	470	Intergenic
XR_523688.3	103399717	NW_007594252.1	+	2	301	29	442	Intergenic
XR_003049142.1	112486627	NW_007585765.1	+	2	961	233	1316	Intergenic
XR_003049168.1	112486666	NW_007589077.1	-	3	427	102	708	Intergenic
XR_003049204.1	112486736	NW_007597504.1	+	2	236	7	377	Intergenic
XR_003051342.1	112487856	NC_024318.1	-	2	486	4662613	4676016	Intergenic
XR_001760813.2	103387342	NC_024318.1	-	12	1761	9399048	9418869	Intergenic
XR_003051357.1	112487863	NC_024318.1	-	3	576	8231706	8245172	Antisense
XR_522394.3	103387110	NC_024318.1	-	5	734	5187937	5192193	Intergenic
XR_003051354.1	103387106	NC_024318.1	-	13	2535	4740554	4758796	Intergenic
XR_003051253.1	112487804	NC_024318.1	-	3	3337	18205569	18209177	Intronic
XR_003051341.1	112487856	NC_024318.1	-	2	423	4662613	4664990	Intergenic
XR_003051257.1	112487808	NC_024318.1	-	2	9365	12737192	12746593	Intronic
XR_003051386.1	112487883	NC_024318.1	-	4	481	7237760	7326866	Antisense
XR_001760847.2	107989335	NC_024318.1	-	3	1782	8941756	8950630	Intergenic
XR_003051391.1	103387664	NC_024318.1	-	4	3795	14384890	14394656	Intergenic
XR_003051269.1	112487815	NC_024318.1	-	6	1279	5945263	5952151	Antisense
XR_522395.3	103387111	NC_024318.1	-	4	447	5193691	5198371	Antisense
XR_003051355.1	103387106	NC_024318.1	-	14	3133	4740554	4758796	Intergenic
XR_522348.3	103386864	NC_024318.1	-	4	2441	75142	84591	Antisense
XR_522400.3	103387148	NC_024318.1	-	4	972	5564810	5570307	Antisense
XR_003051314.1	103387342	NC_024318.1	-	13	1668	9399048	9418869	Intergenic
XR_003051343.1	112487857	NC_024318.1	-	3	1783	4113286	4115230	Intergenic
XR_003051280.1	112487821	NC_024318.1	-	4	595	12283717	12286221	Antisense
XR_003051234.1	103386891	NC_024318.1	-	4	952	623085	627759	Antisense
XR_003051237.1	103386891	NC_024318.1	-	5	1171	623085	645957	Antisense
XR_003051233.1	103386891	NC_024318.1	-	4	875	623085	629365	Antisense
XR_003051252.1	112487804	NC_024318.1	-	3	3342	18205569	18209177	Intronic
XR_003051358.1	103387114	NC_024318.1	-	7	1612	5199997	5204486	Intergenic
XR_001760810.2	103387342	NC_024318.1	-	11	1697	9399048	9418869	Intergenic
XR_522363.3	103386941	NC_024318.1	-	3	2198	1671126	1683000	Intergenic
XR_003051282.1	112487823	NC_024318.1	-	4	1821	1760427	1762841	Antisense
XR_003051238.1	112486264	NC_024318.1	-	4	1212	620460	622723	Antisense
XR_003051241.1	112487802	NC_024318.1	-	2	824	17134619	17135479	Intergenic
XR_001760805.2	103387106	NC_024318.1	-	12	2884	4740554	4758796	Intergenic
XR_522422.3	103387476	NC_024318.1	-	6	1547	11083431	11087238	Intergenic
XR_003051371.1	112487874	NC_024318.1	-	3	911	11924188	11928160	Antisense
XR_003051268.1	112487815	NC_024318.1	-	5	1330	5945263	5952097	Antisense
XR_003051333.1	112487848	NC_024318.1	-	4	1166	10873087	10890389	Intergenic
XR_003051266.1	112487814	NC_024318.1	-	3	388	5927476	5929386	Antisense
XR_003051283.1	112487823	NC_024318.1	-	4	1331	1760427	1762899	Antisense
XR_003051236.1	103386891	NC_024318.1	-	3	707	623085	629365	Antisense
XR_003051402.1	112487890	NC_024318.1	-	10	1457	10185757	10204626	Antisense
XR_522387.3	103387081	NC_024318.1	-	3	415	4294435	4295639	Antisense
XR_003051235.1	103386891	NC_024318.1	-	6	1252	623085	645957	Antisense
XR_001760821.2	103387110	NC_024318.1	-	4	567	5187937	5192193	Intergenic
XR_001760881.2	107989348	NC_024318.1	-	16	3792	15503616	15551981	Antisense
XR_001760812.2	103387342	NC_024318.1	-	12	1809	9399048	9418869	Intergenic
XR_003051401.1	112487890	NC_024318.1	-	10	1492	10185757	10209031	Antisense
XR_003051389.1	112487885	NC_024318.1	-	3	604	6691191	6691877	Sense
XR_522413.3	103387358	NC_024318.1	-	4	1174	9622749	9639024	Antisense
XR_003051328.1	103386941	NC_024318.1	-	8	2807	1658234	1683000	Intergenic
XR_522418.3	103387448	NC_024318.1	-	4	1401	10640461	10643125	Intergenic
XR_003051284.1	112487824	NC_024318.1	-	4	2095	15328982	15333207	Intergenic
XR_003051264.1	112487813	NC_024318.1	-	4	977	300928	303464	Antisense
XR_003051388.1	112487884	NC_024318.1	-	3	370	6997546	6999374	Antisense
XR_001760801.2	103387106	NC_024318.1	-	13	2989	4740554	4758796	Intergenic
XR_522432.3	103387526	NC_024318.1	-	4	735	11640912	11643575	Intergenic
XR_003051299.1	112487828	NC_024318.1	-	5	778	4102102	4108412	Intergenic
XR_522407.2	103387243	NC_024318.1	-	4	678	6672318	6677685	Intergenic
XR_003051365.1	112487868	NC_024318.1	-	3	461	5736970	5739225	Antisense
XR_003051353.1	103387106	NC_024318.1	-	12	2953	4740554	4758796	Intergenic
XR_003051319.1	112487841	NC_024318.1	-	3	460	11897490	11899244	Antisense
XR_003051315.1	103386884	NC_024318.1	-	6	1908	567477	576779	Intergenic
XR_003051255.1	112487806	NC_024318.1	-	2	1972	9383821	9386218	Intergenic
XR_003051403.1	112487890	NC_024318.1	-	11	1528	10185757	10204770	Antisense
XR_003051232.1	112487801	NC_024318.1	-	2	485	13108427	13109000	Intergenic
XR_522445.3	103387608	NC_024318.1	-	3	1188	13736868	13738358	Intergenic
XR_001760882.2	107989349	NC_024318.1	-	3	933	12374858	12376623	Intergenic
XR_522410.3	103387342	NC_024318.1	-	13	2043	9399048	9419226	Intergenic
XR_003051380.1	112487881	NC_024318.1	-	3	581	3193806	3214191	Antisense
XR_003051271.1	112487815	NC_024318.1	-	7	1029	5945263	5952151	Antisense
XR_522436.1	103387547	NC_024318.1	-	3	220	12377662	12378315	Intergenic
XR_003051351.1	103387106	NC_024318.1	-	13	3079	4740554	4758796	Intergenic
XR_522430.2	103387489	NC_024318.1	-	3	575	11350179	11352671	Intergenic
XR_003051400.1	112487890	NC_024318.1	-	11	1742	10185757	10209012	Antisense
XR_003051352.1	103387106	NC_024318.1	-	14	2756	4740554	4758796	Intergenic
XR_003051297.1	107989325	NC_024318.1	-	4	439	14270617	14273325	Intergenic
XR_003051261.1	112487810	NC_024318.1	-	2	2593	2525380	2528022	Intronic
XR_003051301.1	112487830	NC_024318.1	-	2	261	5842778	5843092	Intronic
XR_003051281.1	112487822	NC_024318.1	-	3	365	4291374	4291883	Antisense
XR_522364.3	103386954	NC_024318.1	-	3	498	1817157	1832744	Intergenic
XR_003051267.1	112487814	NC_024318.1	-	4	383	5927476	5929327	Antisense
XR_003051272.1	112487816	NC_024318.1	-	4	755	8389215	8479855	Antisense
XR_001760811.2	103387342	NC_024318.1	-	12	1753	9399048	9418869	Intergenic
XR_003051270.1	112487815	NC_024318.1	-	7	1033	5945263	5952151	Antisense
XR_001760834.2	103387476	NC_024318.1	-	6	1645	11083431	11087238	Intergenic
XR_003051263.1	112487813	NC_024318.1	-	4	1013	300541	303464	Antisense
XR_001760861.2	103386864	NC_024318.1	-	3	2600	75142	84591	Antisense
XR_522361.2	103386934	NC_024318.1	+	4	2504	1407702	1422065	Antisense
XR_001760826.2	107989321	NC_024318.1	+	4	4574	5789960	5800236	Intergenic
XR_522462.3	103387735	NC_024318.1	+	9	1498	16808836	16828943	Antisense
XR_003051273.1	112487817	NC_024318.1	+	2	3674	10960245	10964051	Intergenic
XR_003051320.1	103387715	NC_024318.1	+	4	1171	16267617	16269403	Intergenic
XR_003051278.1	112487819	NC_024318.1	+	3	2122	12909259	12913424	Antisense
XR_522384.3	103387048	NC_024318.1	+	7	2267	4051771	4059074	Antisense
XR_001760823.2	107989319	NC_024318.1	+	3	1249	4993477	5023367	Intergenic
XR_003051366.1	112487869	NC_024318.1	+	3	801	5807910	5810587	Antisense
XR_003051231.1	103386971	NC_024318.1	+	6	3576	1990088	2017807	Antisense
XR_003051277.1	112487819	NC_024318.1	+	4	5235	12905960	12913424	Antisense
XR_003051254.1	112487805	NC_024318.1	+	3	6263	9513419	9524571	Intergenic
XR_003051331.1	112487847	NC_024318.1	+	3	1233	7582073	7587539	Intronic
XR_001760796.2	107989311	NC_024318.1	+	5	774	112840	125600	Intergenic
XR_003051313.1	112487838	NC_024318.1	+	3	667	961396	984805	Intergenic
XR_003051274.1	103387469	NC_024318.1	+	5	1426	11010370	11048024	Intergenic
XR_003051348.1	103387735	NC_024318.1	+	9	1219	16807362	16828944	Antisense
XR_003051285.1	112487825	NC_024318.1	+	2	1076	15336764	15337949	Intronic
XR_003051390.1	112487886	NC_024318.1	+	3	707	7513340	7518461	Antisense
XR_522369.3	103386971	NC_024318.1	+	7	3759	1990088	2017807	Antisense
XR_003051326.1	112487845	NC_024318.1	+	12	2123	8031775	8100185	Intergenic
XR_001760822.2	103387174	NC_024318.1	+	6	852	5751055	5778058	Antisense
XR_522434.2	103387535	NC_024318.1	+	3	1937	12516621	12539681	Intergenic
XR_003051327.1	112487845	NC_024318.1	+	11	2161	8031726	8100185	Intergenic
XR_003051361.1	112487866	NC_024318.1	+	7	1584	5682083	5705344	Antisense
XR_001760839.2	107989328	NC_024318.1	+	3	2008	16354776	16363079	Antisense
XR_003051298.1	103387048	NC_024318.1	+	7	2844	4051766	4059074	Antisense
XR_522381.3	103386996	NC_024318.1	+	6	1391	3133394	3147657	Intergenic
XR_003051398.1	112487889	NC_024318.1	+	8	3060	10434896	10438919	Intergenic
XR_003051286.1	112487826	NC_024318.1	+	3	5738	12248688	12265339	Intergenic
XR_003051359.1	112487865	NC_024318.1	+	2	1083	5760976	5762090	Antisense
XR_003051287.1	112487827	NC_024318.1	+	2	578	12115649	12116921	Antisense
XR_003051309.1	112487836	NC_024318.1	+	2	229	1052248	1052543	Intergenic
XR_001760840.2	107989329	NC_024318.1	+	2	973	6073006	6082208	Intergenic
XR_522370.3	103386972	NC_024318.1	+	3	1118	2017830	2107003	Intergenic
XR_003051244.1	112487803	NC_024318.1	+	4	1774	4168287	4180869	Antisense
XR_001760837.2	103387721	NC_024318.1	+	6	934	16347149	16354655	Antisense
XR_003051245.1	112487803	NC_024318.1	+	4	1783	4168287	4180869	Antisense
XR_003051336.1	112487850	NC_024318.1	+	8	3955	14620563	14652005	Intergenic
XR_003051344.1	103387813	NC_024318.1	+	3	1206	18393935	18396255	Intergenic
XR_001760818.2	107989318	NC_024318.1	+	5	1074	5224563	5233178	Intergenic
XR_003051228.1	103386971	NC_024318.1	+	7	3756	1990088	2017807	Antisense
XR_522362.3	103386934	NC_024318.1	+	4	1950	1407702	1411549	Intergenic
XR_003051340.1	112487855	NC_024318.1	+	3	568	2751888	2752651	Intergenic
XR_003051360.1	112487866	NC_024318.1	+	7	1581	5682083	5705883	Antisense
XR_003051379.1	107989332	NC_024318.1	+	3	330	3125386	3126369	Intergenic
XR_003051337.1	107989312	NC_024318.1	+	8	2522	11629576	11640654	Intergenic
XR_522401.3	103387172	NC_024318.1	+	5	726	5780564	5789904	Antisense
XR_001760838.2	103387735	NC_024318.1	+	9	1193	16807362	16828943	Antisense
XR_003051330.1	112487846	NC_024318.1	+	4	4851	7573099	7580103	Antisense
XR_003051369.1	112487871	NC_024318.1	+	4	500	5711734	5712690	Antisense
XR_522403.2	103387212	NC_024318.1	+	4	390	6265934	6269859	Antisense
XR_522459.3	103387715	NC_024318.1	+	3	998	16267617	16268853	Intergenic
XR_003051378.1	103387012	NC_024318.1	+	8	2637	3360468	3423657	Intergenic
XR_003051362.1	112487866	NC_024318.1	+	6	1361	5682083	5705883	Antisense
XR_003051374.1	112487875	NC_024318.1	+	3	2821	14027111	14046734	Intergenic
XR_001760857.1	103386934	NC_024318.1	+	5	372	1407702	1434288	Antisense
XR_003051262.1	112487812	NC_024318.1	+	4	869	266590	270116	Antisense
XR_003051279.1	112487820	NC_024318.1	+	2	410	13051647	13056729	Antisense
XR_001760869.2	103386971	NC_024318.1	+	6	3573	1990088	2017807	Antisense
XR_522383.3	103387041	NC_024318.1	+	4	1366	3718854	3720760	Intergenic
XR_003051367.1	112487870	NC_024318.1	+	3	450	5779690	5780525	Antisense
XR_003051226.1	112487800	NC_024318.1	+	2	1071	10019590	10022231	Intergenic
XR_003051332.1	112487847	NC_024318.1	+	4	2255	7582073	7600290	Intronic
XR_003051325.1	112487845	NC_024318.1	+	13	2392	8031724	8100185	Intergenic
XR_003051259.1	112487809	NC_024318.1	+	2	731	3822462	3823238	Antisense
XR_003051356.1	112487861	NC_024318.1	+	3	839	4743352	4747010	Intergenic
XR_522371.3	103386979	NC_024318.1	+	3	400	2185410	2186350	Intergenic
XR_003051375.1	112487878	NC_024318.1	+	4	740	17394184	17395343	Intronic
XR_003051350.1	112487860	NC_024318.1	+	2	548	16832880	16864466	Intergenic
XR_003051413.1	112487891	NC_024318.1	+	2	3078	1191720	1196824	Intergenic
XR_003051368.1	112487871	NC_024318.1	+	4	508	5711719	5712690	Antisense
XR_522441.2	103387589	NC_024318.1	+	4	2337	13179303	13183579	Intergenic
XR_003051247.1	112487803	NC_024318.1	+	5	3941	4168287	4197457	Antisense
XR_003051229.1	103386971	NC_024318.1	+	7	3761	1990088	2017807	Antisense
XR_001760892.2	107989354	NC_024318.1	+	4	712	6143802	6159689	Antisense
XR_001760860.2	103386875	NC_024318.1	+	2	1008	90435	91981	Antisense
XR_001760817.2	107989318	NC_024318.1	+	5	1090	5224552	5233178	Intergenic
XR_522431.3	103387506	NC_024318.1	+	5	601	11620241	11623776	Intergenic
XR_522368.3	103386971	NC_024318.1	+	7	3738	1990088	2017807	Antisense
XR_522382.3	103387012	NC_024318.1	+	9	2749	3360468	3423657	Intergenic
XR_003051370.1	112487872	NC_024318.1	+	3	208	5582394	5584124	Antisense
XR_001760865.2	107989342	NC_024318.1	+	4	418	14548879	14552426	Antisense
XR_003051276.1	112487818	NC_024318.1	+	2	340	11616541	11616971	Antisense
XR_003051329.1	112487846	NC_024318.1	+	4	5151	7573099	7580103	Antisense
XR_003051387.1	107989354	NC_024318.1	+	4	606	6144127	6159689	Antisense
XR_003051385.1	112487882	NC_024318.1	+	3	629	6271244	6273504	Antisense
XR_003051256.1	112487807	NC_024318.1	+	4	389	12377813	12390402	Antisense
XR_003051246.1	112487803	NC_024318.1	+	5	1444	4168287	4212150	Antisense
XR_003051311.1	112487837	NC_024318.1	+	4	1687	7652540	7702807	Antisense
XR_003051230.1	103386971	NC_024318.1	+	7	3702	1990088	2017807	Antisense
XR_003051349.1	112487859	NC_024318.1	+	4	2554	16408093	16412702	Intergenic
XR_003051335.1	112487850	NC_024318.1	+	9	4008	14620563	14652005	Intergenic
XR_001760898.2	107989357	NC_024318.1	+	2	4511	11673185	11677761	Antisense
XR_001759845.1	107988269	NW_007595852.1	-	2	219	44	353	Intergenic
XR_523566.3	103398997	NW_007585259.1	+	3	1138	5458	6783	Intergenic
XR_003049120.1	112486610	NW_007585277.1	-	3	300	4666	6428	Intergenic
XR_003049189.1	112486711	NW_007593245.1	+	2	374	17	513	Intergenic
XR_523655.3	103399573	NW_007590442.1	-	3	457	7	625	Intergenic
XR_523587.2	103399125	NW_007585755.1	+	3	312	1	1039	Intergenic
XR_003049735.1	112487029	NC_024311.1	-	5	941	17183131	17190023	Antisense
XR_003049741.1	112487034	NC_024311.1	-	2	1582	1081011	1083111	Intergenic
XR_003049785.1	112487055	NC_024311.1	-	2	1687	7146528	7148250	Intergenic
XR_003049714.1	103378990	NC_024311.1	-	4	1276	9407881	9429400	Intergenic
XR_003049673.1	112487004	NC_024311.1	-	10	3280	7160493	7175751	Antisense
XR_003049712.1	103378990	NC_024311.1	-	5	848	9241283	9429406	Antisense
XR_521533.3	103378783	NC_024311.1	-	3	2253	5752195	5756594	Intergenic
XR_003049752.1	112487043	NC_024311.1	-	2	2397	18687607	18690142	Intergenic
XR_003049675.1	112487005	NC_024311.1	-	3	290	8744943	8746568	Antisense
XR_521553.3	103379053	NC_024311.1	-	3	2239	11511276	11518926	Antisense
XR_001760106.2	103378968	NC_024311.1	-	2	232	8611774	8612090	Intergenic
XR_003049788.1	112487056	NC_024311.1	-	2	2078	7920215	7928105	Intergenic
XR_521534.3	103378783	NC_024311.1	-	4	1697	5748733	5756602	Intergenic
XR_001760048.1	107988568	NC_024311.1	-	2	1938	15118040	15121591	Antisense
XR_001760054.2	107988572	NC_024311.1	-	3	5806	10972129	10991863	Intronic
XR_003049779.1	107988557	NC_024311.1	-	3	1968	11344608	11347909	Antisense
XR_003049677.1	112487006	NC_024311.1	-	3	2313	5029746	5033323	Intergenic
XR_003049670.1	112487004	NC_024311.1	-	9	3370	7160493	7175751	Antisense
XR_003049724.1	112487024	NC_024311.1	-	2	796	7267619	7268445	Intronic
XR_003049773.1	112487050	NC_024311.1	-	3	2814	14721656	14724572	Intergenic
XR_001760073.2	107988587	NC_024311.1	-	4	475	6263915	6321196	Antisense
XR_003049753.1	112487044	NC_024311.1	-	2	1665	6953204	6954975	Intergenic
XR_003049746.1	112487039	NC_024311.1	-	3	381	11919022	11922412	Intergenic
XR_003049708.1	112487017	NC_024311.1	-	10	1212	9919697	9938523	Antisense
XR_003049680.1	112487008	NC_024311.1	-	3	1941	9803493	9806831	Intergenic
XR_003049739.1	112487032	NC_024311.1	-	3	1971	5866940	5875231	Intergenic
XR_003049686.1	103378939	NC_024311.1	-	8	3024	8078788	8091957	Antisense
XR_001760103.2	107988608	NC_024311.1	-	4	681	1282234	1286164	Intergenic
XR_003049678.1	112487007	NC_024311.1	-	2	622	10338534	10339464	Intergenic
XR_003049751.1	112487042	NC_024311.1	-	2	403	5130389	5131896	Intergenic
XR_001760058.2	103378600	NC_024311.1	-	2	449	130974	132581	Intergenic
XR_521565.3	103379202	NC_024311.1	-	6	787	14476758	14480988	Antisense
XR_001760088.2	103378939	NC_024311.1	-	10	1628	8078788	8091957	Antisense
XR_003049789.1	112487058	NC_024311.1	-	2	2456	8329051	8331599	Intronic
XR_003049770.1	103379202	NC_024311.1	-	7	963	14476758	14480988	Antisense
XR_001760050.1	107988571	NC_024311.1	-	5	565	10149231	10159583	Intergenic
XR_003049758.1	103379272	NC_024311.1	-	4	1766	15625355	15668744	Antisense
XR_003049776.1	112487051	NC_024311.1	-	4	510	3226308	3229723	Intergenic
XR_003049736.1	112487030	NC_024311.1	-	2	382	17180907	17181607	Antisense
XR_003049786.1	103378600	NC_024311.1	-	3	775	130974	137972	Intergenic
XR_001760056.2	107988573	NC_024311.1	-	3	1365	7875627	7882205	Intergenic
XR_521549.3	103378990	NC_024311.1	-	4	923	9365296	9429400	Intergenic
XR_003049691.1	112487014	NC_024311.1	-	3	773	12363709	12378199	Intergenic
XR_003049772.1	112487049	NC_024311.1	-	3	359	15017640	15021362	Antisense
XR_003049723.1	112487022	NC_024311.1	-	3	468	3768461	3771508	Antisense
XR_003049657.1	107988582	NC_024311.1	-	4	689	11880080	11884110	Intergenic
XR_003049790.1	112487059	NC_024311.1	-	2	1509	9068631	9071021	Intergenic
XR_003049672.1	112487004	NC_024311.1	-	10	3152	7160493	7175751	Antisense
XR_003049740.1	112487033	NC_024311.1	-	2	1627	17615113	17616785	Antisense
XR_003049732.1	112487027	NC_024311.1	-	3	1702	13617743	13621781	Intergenic
XR_003049711.1	107988563	NC_024311.1	-	3	1968	14225996	14228676	Intergenic
XR_003049713.1	103378990	NC_024311.1	-	6	2261	9239767	9429411	Antisense
XR_003049782.1	107988571	NC_024311.1	-	6	699	10149231	10158993	Intergenic
XR_003049787.1	103378600	NC_024311.1	-	3	1186	130974	133416	Intergenic
XR_003049685.1	103378939	NC_024311.1	-	9	3051	8078788	8091957	Antisense
XR_521569.3	103379292	NC_024311.1	-	3	2261	16236604	16245674	Antisense
XR_003049661.1	112487000	NC_024311.1	-	2	3481	4618219	4621973	Intergenic
XR_003049709.1	112487017	NC_024311.1	-	10	1293	9919697	9939782	Antisense
XR_003049728.1	112487025	NC_024311.1	-	4	790	11422489	11425829	Intergenic
XR_001760038.2	107988563	NC_024311.1	-	3	4705	14164649	14228667	Intergenic
XR_003049743.1	112487036	NC_024311.1	-	2	1994	8035451	8037519	Intergenic
XR_003049715.1	103378990	NC_024311.1	-	4	1086	9392414	9429401	Intergenic
XR_003049721.1	112487021	NC_024311.1	-	3	2869	6858486	6896223	Antisense
XR_003049742.1	112487035	NC_024311.1	-	3	865	8629330	8632618	Antisense
XR_001760039.2	103378990	NC_024311.1	-	4	2339	9414513	9429400	Intergenic
XR_003049749.1	103379292	NC_024311.1	-	3	668	16236145	16242441	Antisense
XR_003049687.1	112487011	NC_024311.1	-	3	401	8500950	8504642	Antisense
XR_001760093.2	107988601	NC_024311.1	-	4	1207	10217014	10218956	Antisense
XR_003049747.1	103379292	NC_024311.1	-	3	655	16236245	16242441	Antisense
XR_001760067.2	107988582	NC_024311.1	-	4	686	11880080	11884110	Intergenic
XR_003049757.1	103379272	NC_024311.1	-	4	681	15642781	15668743	Antisense
XR_003049748.1	103379292	NC_024311.1	-	3	666	16236221	16242441	Antisense
XR_003049771.1	103379202	NC_024311.1	-	7	966	14476758	14480988	Antisense
XR_003049796.1	112487068	NC_024311.1	-	3	691	8523386	8603113	Antisense
XR_003049756.1	103379272	NC_024311.1	-	4	609	15651146	15668744	Antisense
XR_003049671.1	112487004	NC_024311.1	-	9	3568	7160493	7179692	Antisense
XR_003049738.1	112487032	NC_024311.1	-	3	1378	5866940	5870058	Intergenic
XR_001760053.1	107988571	NC_024311.1	-	6	697	10149231	10159583	Intergenic
XR_003049734.1	112487028	NC_024311.1	-	3	1747	13151142	13159724	Antisense
XR_003049720.1	112487020	NC_024311.1	-	3	452	10516296	10518572	Antisense
XR_521539.3	103378840	NC_024311.1	-	3	4865	7050765	7058642	Intergenic
XR_003049710.1	112487018	NC_024311.1	-	2	593	9940778	9941484	Antisense
XR_001760089.2	107988597	NC_024311.1	+	3	1552	3565414	3567780	Antisense
XR_521532.2	103378772	NC_024311.1	+	5	1103	5585605	5587120	Intergenic
XR_521525.3	103378744	NC_024311.1	+	6	1225	4839079	4862920	Intergenic
XR_003049701.1	112487015	NC_024311.1	+	7	1363	18459424	18470447	Antisense
XR_003049700.1	112487015	NC_024311.1	+	7	1480	18459424	18470447	Antisense
XR_001760055.2	107988074	NC_024311.1	+	8	2791	12150667	12162276	Intergenic
XR_003049737.1	112487031	NC_024311.1	+	2	1373	13653484	13654906	Intergenic
XR_003049765.1	112487046	NC_024311.1	+	2	2404	6931087	6933572	Intergenic
XR_003049775.1	107988576	NC_024311.1	+	3	1750	4557129	4607093	Intergenic
XR_003049750.1	112487041	NC_024311.1	+	2	301	18761064	18761454	Antisense
XR_003049706.1	112487016	NC_024311.1	+	3	7088	3782827	3810952	Intergenic
XR_003049781.1	112487053	NC_024311.1	+	3	685	11381391	11382973	Antisense
XR_003049666.1	112487001	NC_024311.1	+	3	301	12031503	12038608	Antisense
XR_003049792.1	103378772	NC_024311.1	+	6	2487	5584125	5587120	Intergenic
XR_521552.3	103379046	NC_024311.1	+	3	936	10716770	10720586	Intergenic
XR_001760066.2	107988581	NC_024311.1	+	3	288	7377816	7378876	Antisense
XR_521551.2	103379041	NC_024311.1	+	3	1651	10827651	10832268	Intergenic
XR_003049699.1	112487015	NC_024311.1	+	7	1186	18460046	18470447	Antisense
XR_003049705.1	112487016	NC_024311.1	+	2	3761	3783101	3804815	Intergenic
XR_003049658.1	112486999	NC_024311.1	+	3	2091	4462509	4466941	Intergenic
XR_003049793.1	103378772	NC_024311.1	+	6	2463	5584125	5587120	Intergenic
XR_521531.3	103378771	NC_024311.1	+	3	2215	5581448	5584030	Intergenic
XR_003049690.1	103379112	NC_024311.1	+	3	1823	12407845	12412207	Intergenic
XR_003049683.1	112487010	NC_024311.1	+	2	3010	18046724	18049798	Antisense
XR_003049784.1	112487054	NC_024311.1	+	3	2530	11477229	11480550	Antisense
XR_521524.3	103378743	NC_024311.1	+	4	3273	4783716	4814426	Intergenic
XR_003049791.1	103378772	NC_024311.1	+	6	2466	5584125	5587120	Intergenic
XR_003049783.1	103378896	NC_024311.1	+	6	7630	7720109	7830585	Antisense
XR_003049780.1	112487053	NC_024311.1	+	3	660	11381391	11382973	Antisense
XR_003049682.1	107988600	NC_024311.1	+	7	2749	17961235	18099522	Antisense
XR_003049660.1	112486999	NC_024311.1	+	3	2379	4462509	4466941	Intergenic
XR_521535.3	103378790	NC_024311.1	+	3	3738	5930168	5934349	Antisense
XR_001760036.2	107988562	NC_024311.1	+	4	4638	16019677	16070197	Intergenic
XR_003049768.1	103379198	NC_024311.1	+	5	1633	14578169	14588024	Intergenic
XR_003049659.1	112486999	NC_024311.1	+	3	2071	4462509	4466941	Intergenic
XR_003049688.1	112487012	NC_024311.1	+	5	1850	17073838	17078126	Antisense
XR_001760091.2	107988600	NC_024311.1	+	6	2693	17961235	18099522	Antisense
XR_003049717.1	112487019	NC_024311.1	+	3	1879	18191020	18199444	Antisense
XR_521522.3	103378631	NC_024311.1	+	4	885	1716357	1722776	Antisense
XR_003049689.1	112487013	NC_024311.1	+	4	1099	17060154	17073826	Sense
XR_003049744.1	112487037	NC_024311.1	+	2	1268	352364	353694	Antisense
XR_003049668.1	112487002	NC_024311.1	+	4	2369	11513408	11518777	Intergenic
AMSDT	103379402	NC_024311.1	+	4	754	18675461	18676838	Antisense
XR_003049762.1	103378743	NC_024311.1	+	4	2201	4783716	4838743	Intergenic
XR_003049669.1	112487002	NC_024311.1	+	4	2363	11513306	11518777	Intergenic
XR_003049702.1	112487015	NC_024311.1	+	7	1255	18459424	18470447	Antisense
XR_003049763.1	103378743	NC_024311.1	+	4	2944	4783716	4814426	Intergenic
XR_003049769.1	103379198	NC_024311.1	+	5	1672	14578167	14588024	Intergenic
XR_003049759.1	107988562	NC_024311.1	+	5	7661	16019677	16074775	Intergenic
XR_003049697.1	112487015	NC_024311.1	+	7	1178	18457157	18470447	Antisense
XR_001760084.2	107988594	NC_024311.1	+	3	2999	10419685	10423056	Intergenic
XR_003049794.1	112487066	NC_024311.1	+	2	1103	7401110	7406909	Antisense
XR_003049774.1	107988576	NC_024311.1	+	3	1089	4557129	4617631	Intergenic
XR_003049760.1	107988562	NC_024311.1	+	4	7578	16019677	16074775	Intergenic
XR_003049745.1	112487038	NC_024311.1	+	3	572	16898375	16902653	Antisense
XR_521570.3	103379384	NC_024311.1	+	4	496	18374624	18457064	Antisense
XR_003049696.1	112487015	NC_024311.1	+	7	1396	18459424	18470447	Antisense
XR_001760085.2	107988596	NC_024311.1	+	2	816	9912675	9913627	Intergenic
XR_521563.3	103379198	NC_024311.1	+	5	1675	14578169	14588024	Intergenic
XR_003049729.1	112487026	NC_024311.1	+	3	2850	12952295	12955209	Intronic
XR_003049777.1	112487052	NC_024311.1	+	2	847	7243847	7246152	Antisense
XR_521559.2	103379112	NC_024311.1	+	4	1310	12407845	12412207	Intergenic
XR_003049698.1	112487015	NC_024311.1	+	7	1588	18459424	18470447	Antisense
XR_001760099.2	107988606	NC_024311.1	+	4	1865	16984495	16993224	Intergenic
XR_003049795.1	112487067	NC_024311.1	+	3	1713	4478145	4498359	Intergenic
XR_003049716.1	112487019	NC_024311.1	+	4	1958	18191020	18199444	Antisense
XR_003049761.1	107988562	NC_024311.1	+	4	5850	16019677	16074775	Intergenic
XR_523584.2	103399108	NW_007585644.1	+	3	584	180	1444	Intergenic
XR_001760637.2	103385135	NC_024316.1	-	9	3179	12974243	13152920	Antisense
XR_003050802.1	112487586	NC_024316.1	-	3	1199	8797281	8802611	Antisense
XR_003050753.1	112487561	NC_024316.1	-	4	1473	18352517	18361249	Antisense
XR_003050966.1	112487657	NC_024316.1	-	3	585	10957015	10960771	Intergenic
XR_522105.3	103384427	NC_024316.1	-	5	3495	1055696	1070815	Antisense
XR_003050967.1	103384994	NC_024316.1	-	3	1866	11091193	11093305	Intergenic
XR_522224.3	103385413	NC_024316.1	-	3	614	18974375	18978047	Antisense
XR_522218.3	103385346	NC_024316.1	-	3	1783	17220143	17223027	Intergenic
XR_522187.3	103385135	NC_024316.1	-	9	3185	12974243	13152920	Antisense
XR_001760621.2	107989123	NC_024316.1	-	2	2156	1108775	1119982	Intergenic
XR_003050801.1	112487585	NC_024316.1	-	3	741	14129924	14132606	Antisense
XR_003050915.1	112487634	NC_024316.1	-	5	3647	14379620	14392223	Antisense
XR_003050965.1	112487656	NC_024316.1	-	3	2799	13821805	13825670	Antisense
XR_522106.3	103384433	NC_024316.1	-	3	422	1169311	1170225	Intronic
XR_522122.2	103384647	NC_024316.1	-	7	2634	3613701	3637216	Intergenic
XR_003050897.1	103384427	NC_024316.1	-	4	361	1035368	1059004	Antisense
XR_001760674.2	107989151	NC_024316.1	-	3	1299	15044050	15045876	Antisense
XR_522146.1	103384766	NC_024316.1	-	3	214	6680203	6680785	Intergenic
XR_003050749.1	112487559	NC_024316.1	-	2	1579	15806985	15808646	Antisense
XR_003050885.1	112487621	NC_024316.1	-	3	3859	15048243	15052735	Antisense
XR_003050881.1	107989147	NC_024316.1	-	3	563	19166304	19213315	Intergenic
XR_522169.3	103384945	NC_024316.1	-	4	650	9743596	9744829	Intergenic
XR_001760652.2	103385504	NC_024316.1	-	4	418	19925759	19932832	Antisense
XR_522238.3	103385575	NC_024316.1	-	2	584	20537277	20540735	Intronic
XR_003050781.1	103384647	NC_024316.1	-	6	4085	3613701	3637216	Intergenic
XR_003050963.1	112487654	NC_024316.1	-	3	1188	11284883	11310080	Intergenic
XR_003050793.1	112487583	NC_024316.1	-	2	305	2745924	2749336	Antisense
XR_001760643.2	103384945	NC_024316.1	-	4	1731	9737897	9744829	Intergenic
XR_522121.2	103384647	NC_024316.1	-	6	4094	3613701	3637216	Intergenic
XR_003050762.1	112487564	NC_024316.1	-	7	774	20459320	20461275	Antisense
XR_003050838.1	112487591	NC_024316.1	-	3	1214	20089238	20090867	Intergenic
XR_003050865.1	112487608	NC_024316.1	-	2	1190	17976172	17977471	Intergenic
XR_003050830.1	112487587	NC_024316.1	-	2	916	6518219	6520574	Antisense
XR_003050839.1	112487591	NC_024316.1	-	3	1048	20089238	20090867	Intergenic
XR_522204.3	103385215	NC_024316.1	-	4	453	14342938	14344185	Intergenic
XR_003050744.1	103385269	NC_024316.1	-	7	1385	15831218	15869556	Antisense
XR_003050884.1	112487619	NC_024316.1	-	2	2026	7108541	7110612	Antisense
XR_001760693.2	107989158	NC_024316.1	-	4	963	19863472	19865107	Intergenic
XR_003050993.1	112487674	NC_024316.1	-	1	379	3331947	3332325	Intergenic
XR_003050982.1	112487664	NC_024316.1	-	3	1658	2171052	2173909	Intergenic
XR_003050882.1	107989147	NC_024316.1	-	3	388	19190917	19213315	Intergenic
XR_003050923.1	103385306	NC_024316.1	-	3	1564	16657739	16667199	Intergenic
XR_003050954.1	112487649	NC_024316.1	-	3	1638	6259804	6289552	Intergenic
XR_522178.3	103385008	NC_024316.1	-	4	1307	11396993	11401835	Intergenic
XR_003050843.1	112487594	NC_024316.1	-	4	3210	11186718	11198285	Intergenic
XR_522171.3	103384974	NC_024316.1	-	3	1275	10610575	10612137	Intergenic
XR_003050864.1	103384886	NC_024316.1	-	4	934	7493418	7536758	Intergenic
XR_003050832.1	103385135	NC_024316.1	-	8	3319	12974243	13152929	Antisense
XR_003050961.1	112487653	NC_024316.1	-	4	647	7548432	7595084	Intergenic
XR_001760634.2	107989136	NC_024316.1	-	2	1094	19649346	19650483	Intergenic
XR_001760691.2	107989157	NC_024316.1	-	3	349	10743248	10744090	Antisense
XR_003050772.1	112487570	NC_024316.1	-	2	2248	10714224	10716855	Intronic
XR_522243.3	103385582	NC_024316.1	-	7	1269	20454202	20458130	Antisense
XR_003050840.1	112487591	NC_024316.1	-	3	1204	20089238	20090867	Intergenic
XR_522119.2	103384624	NC_024316.1	-	4	964	3512498	3513946	Intergenic
XR_003050960.1	112487653	NC_024316.1	-	4	664	7548412	7595084	Intergenic
XR_003050754.1	112487561	NC_024316.1	-	4	837	18353866	18361249	Antisense
XR_003050833.1	103385135	NC_024316.1	-	8	1846	12939772	13152929	Antisense
XR_003050834.1	103385135	NC_024316.1	-	8	3313	12974243	13152929	Antisense
XR_003050973.1	103385128	NC_024316.1	-	7	2682	13255986	13262826	Intergenic
XR_522142.3	103384752	NC_024316.1	-	3	1513	6110623	6117293	Intergenic
XR_003050889.1	103385504	NC_024316.1	-	4	322	19925822	19932832	Antisense
XR_003050911.1	103384529	NC_024316.1	-	3	1692	2180646	2205658	Antisense
XR_003050752.1	112487561	NC_024316.1	-	3	912	18353866	18361249	Antisense
XR_003050917.1	112487635	NC_024316.1	-	2	646	14344531	14345743	Intergenic
XR_003050759.1	103385582	NC_024316.1	-	7	1188	20454202	20457524	Antisense
XR_003050974.1	103385128	NC_024316.1	-	8	2540	13255986	13262826	Intergenic
XR_003050750.1	112487560	NC_024316.1	-	2	1442	14072094	14074566	Intronic
XR_003050863.1	103384886	NC_024316.1	-	5	1201	7493418	7536758	Intergenic
XR_003050962.1	112487653	NC_024316.1	-	4	1117	7540129	7595084	Intergenic
XR_003050761.1	103385582	NC_024316.1	-	6	1286	20454202	20457524	Antisense
XR_001760692.2	107989158	NC_024316.1	-	3	1099	19863472	19865107	Intergenic
XR_003050888.1	103385504	NC_024316.1	-	4	863	19929069	19932832	Antisense
XR_003050975.1	112487661	NC_024316.1	-	4	865	18021772	18036642	Antisense
XR_001760689.2	103384887	NC_024316.1	-	3	2374	7469847	7483696	Intergenic
XR_003050977.1	103385379	NC_024316.1	-	4	1627	18009322	18013041	Intergenic
XR_003050760.1	103385582	NC_024316.1	-	7	1081	20454186	20457524	Antisense
XR_001760694.2	107989158	NC_024316.1	-	4	859	19863472	19865107	Intergenic
XR_003050883.1	112487618	NC_024316.1	-	2	631	20538705	20539375	Intronic
XR_003050928.1	112487640	NC_024316.1	-	2	1252	453219	454509	Intergenic
XR_003050983.1	112487664	NC_024316.1	-	3	1377	2171052	2173909	Intergenic
XR_001760648.2	103384529	NC_024316.1	-	4	1852	2180646	2205658	Antisense
XR_003050916.1	112487634	NC_024316.1	-	6	3302	14379620	14392223	Antisense
XR_522116.3	103384555	NC_024316.1	-	2	2225	2479286	2481560	Intergenic
XR_003050976.1	112487661	NC_024316.1	-	4	853	18021772	18036642	Antisense
XR_003050794.1	112487584	NC_024316.1	-	2	895	2734129	2735062	Intergenic
XR_003050910.1	112487630	NC_024316.1	-	3	1508	2208115	2215404	Intergenic
XR_003050836.1	112487590	NC_024316.1	-	6	864	11543345	11552861	Antisense
XR_003050758.1	103385582	NC_024316.1	-	6	1275	20454202	20457524	Antisense
XR_003050745.1	103385269	NC_024316.1	-	7	1333	15831218	15872532	Antisense
XR_522160.3	103384902	NC_024316.1	-	5	1713	8834183	8852672	Intergenic
XR_003050770.1	112487568	NC_024316.1	-	3	2692	12314648	12327095	Intergenic
XR_003050942.1	112487648	NC_024316.1	-	2	1751	7216962	7218830	Antisense
XR_003050845.1	112487596	NC_024316.1	+	3	1225	12641345	12648940	Antisense
XR_003050850.1	112487598	NC_024316.1	+	4	690	12396460	12398745	Antisense
XR_003050768.1	112487566	NC_024316.1	+	3	2813	12315252	12321404	Intergenic
XR_522149.3	103384798	NC_024316.1	+	3	1041	7277464	7282100	Intergenic
XR_003050907.1	112487629	NC_024316.1	+	4	1141	2675535	2682050	Antisense
XR_522206.3	103385262	NC_024316.1	+	3	976	15525698	15529985	Antisense
XR_003050913.1	112487633	NC_024316.1	+	4	982	15193069	15198649	Intergenic
XR_003050860.1	103384815	NC_024316.1	+	4	1349	8581904	8588162	Intergenic
XR_003050931.1	103385264	NC_024316.1	+	3	1031	15558732	15610066	Antisense
XR_003050873.1	103384701	NC_024316.1	+	2	828	5471630	5472557	Intergenic
XR_003050964.1	112487655	NC_024316.1	+	3	824	3882235	3890321	Intergenic
XR_522220.3	103385375	NC_024316.1	+	4	1189	17992758	17994982	Intergenic
XR_003050872.1	112487611	NC_024316.1	+	3	1036	5020439	5022421	Sense
XR_003050924.1	112487637	NC_024316.1	+	3	915	12796984	12809362	Antisense
XR_003050859.1	112487605	NC_024316.1	+	2	559	20625647	20628541	Antisense
XR_003050856.1	112487602	NC_024316.1	+	2	914	14891945	14892897	Intronic
XR_003050878.1	112487616	NC_024316.1	+	3	663	20338674	20339535	Antisense
XR_003050777.1	112487572	NC_024316.1	+	6	891	8212733	8216742	Antisense
XR_003050930.1	103385264	NC_024316.1	+	3	1005	15558732	15570992	Antisense
XR_001760624.2	103384815	NC_024316.1	+	4	1345	8581904	8588162	Intergenic
XR_003050940.1	112487647	NC_024316.1	+	2	277	2517248	2518623	Intergenic
XR_003050890.1	112487622	NC_024316.1	+	3	277	20754794	20790376	Antisense
XR_003050747.1	103385268	NC_024316.1	+	4	1016	15869730	15873096	Intergenic
XR_003050792.1	103384572	NC_024316.1	+	3	1146	2733433	2737947	Intergenic
XR_001760649.2	107989143	NC_024316.1	+	4	456	17320037	17324415	Intergenic
XR_003050841.1	112487592	NC_024316.1	+	2	683	20065312	20066033	Antisense
XR_003050971.1	112487658	NC_024316.1	+	2	843	2558164	2560151	Intergenic
XR_003050847.1	112487596	NC_024316.1	+	4	1156	12641345	12648940	Antisense
XR_003050757.1	112487563	NC_024316.1	+	3	2543	16486096	16488715	Intronic
XR_522126.2	103384689	NC_024316.1	+	3	3259	4813025	4822533	Antisense
XR_001760626.2	107989127	NC_024316.1	+	3	683	8469744	8520344	Intergenic
XR_003050774.1	112487571	NC_024316.1	+	2	919	19261358	19262389	Intergenic
XR_003050767.1	112487565	NC_024316.1	+	3	1724	15529994	15535723	Antisense
XR_522111.3	103384489	NC_024316.1	+	4	580	1798290	1799794	Intergenic
XR_003050835.1	112487589	NC_024316.1	+	2	284	2301625	2302001	Intronic
XR_003050848.1	112487596	NC_024316.1	+	3	1171	12641345	12648940	Antisense
XR_003050866.1	112487609	NC_024316.1	+	2	914	2873093	2874449	Antisense
XR_003050925.1	112487637	NC_024316.1	+	3	873	12796984	12809362	Antisense
XR_003050855.1	103385000	NC_024316.1	+	4	886	11205454	11207139	Intergenic
XR_001760625.2	103384815	NC_024316.1	+	4	1340	8581905	8588162	Intergenic
XR_003050748.1	103385268	NC_024316.1	+	5	1284	15869723	15877034	Intergenic
XR_003050846.1	112487596	NC_024316.1	+	3	564	12641345	12646893	Antisense
XR_003050912.1	112487633	NC_024316.1	+	3	1307	15193069	15198649	Intergenic
XR_003050849.1	112487597	NC_024316.1	+	4	1554	19044137	19066815	Antisense
XR_003050981.1	112487663	NC_024316.1	+	3	4444	8618681	8624916	Intergenic
XR_003050746.1	103385268	NC_024316.1	+	6	3247	15869692	15881926	Antisense
XR_522153.2	103384828	NC_024316.1	+	4	912	8198817	8201689	Antisense
XR_003050791.1	103384572	NC_024316.1	+	3	1398	2733433	2737949	Intergenic
XR_001760645.2	103385268	NC_024316.1	+	5	1244	15869724	15879636	Intergenic
XR_003050906.1	112487629	NC_024316.1	+	4	1232	2675535	2683121	Antisense
XR_003050874.1	112487612	NC_024316.1	+	3	2968	4924751	4929898	Antisense
XR_003050955.1	112487651	NC_024316.1	+	3	650	17012741	17013897	Intronic
XR_001760644.2	103385268	NC_024316.1	+	5	3214	15869692	15881926	Antisense
XR_003050769.1	112487567	NC_024316.1	+	2	1368	12306544	12307958	Antisense
XR_003050851.1	112487600	NC_024316.1	+	3	2543	10249940	10253895	Antisense
XR_003050779.1	112487574	NC_024316.1	+	3	1151	8203193	8210180	Antisense
XR_003050780.1	112487574	NC_024316.1	+	3	658	8203193	8212361	Antisense
XR_003050918.1	112487636	NC_024316.1	+	4	2238	20645339	20652013	Antisense
XR_003050876.1	112487614	NC_024316.1	+	4	4816	5588951	5618769	Intergenic
XR_003050877.1	112487615	NC_024316.1	+	3	7325	5833033	5857409	Intergenic
XR_003050831.1	112487588	NC_024316.1	+	2	768	17929097	17929930	Intronic
XR_522175.3	103385000	NC_024316.1	+	5	786	11205454	11207139	Intergenic
XR_003050896.1	112487623	NC_024316.1	+	4	684	6986033	6995250	Antisense
XR_001760635.2	103384798	NC_024316.1	+	4	1072	7277462	7282100	Intergenic
XR_003050939.1	112487646	NC_024316.1	+	2	2354	2512161	2516199	Intergenic
XR_003050858.1	112487604	NC_024316.1	+	4	701	10483113	10498591	Antisense
XR_003050895.1	112487623	NC_024316.1	+	3	750	6986033	6990355	Antisense
XR_001760633.2	107989135	NC_024316.1	+	3	2333	1681723	1688294	Antisense
XR_003050891.1	112487622	NC_024316.1	+	3	849	20754794	20762198	Intergenic
XR_003050875.1	112487613	NC_024316.1	+	6	2220	4930704	4940302	Antisense
XR_522234.3	103385529	NC_024316.1	+	5	2297	20234182	20239607	Intergenic
XR_001760639.2	107989139	NC_024316.1	+	2	446	625044	630436	Intergenic
XR_003050778.1	112487573	NC_024316.1	+	6	1016	8185368	8190021	Antisense
XR_003050927.1	112487639	NC_024316.1	+	2	1457	150521	152019	Antisense
XR_003050932.1	103385264	NC_024316.1	+	3	643	15558732	15616538	Antisense
XR_522123.3	103384648	NC_024316.1	+	2	352	3601542	3602255	Intergenic
XR_003050919.1	112487636	NC_024316.1	+	5	2143	20645339	20652013	Antisense
XR_003050899.1	112487625	NC_024316.1	+	4	6553	4151006	4166191	Antisense
XR_003050783.1	112487576	NC_024316.1	+	3	852	14663149	14680719	Antisense
XR_522209.3	103385268	NC_024316.1	+	4	1205	15869730	15879636	Intergenic
XR_003050902.1	112487626	NC_024316.1	+	4	553	20709301	20716254	Antisense
XR_523610.3	103399267	NW_007586815.1	-	3	535	15	906	Intergenic
XR_003050654.1	112487506	NC_024315.1	-	2	1391	5385184	5386741	Antisense
XR_003050569.1	112487471	NC_024315.1	-	2	690	1795147	1795954	Intronic
XR_522021.3	103383549	NC_024315.1	-	7	1399	5136519	5146501	Antisense
XR_003050566.1	103383280	NC_024315.1	-	4	546	1755797	1758316	Antisense
XR_003050705.1	112487539	NC_024315.1	-	3	388	13790825	13793327	Antisense
XR_001760529.2	107989033	NC_024315.1	-	3	344	3198877	3201021	Antisense
XR_003050716.1	112487545	NC_024315.1	-	2	441	5681852	5682329	Intronic
XR_001760475.2	103383145	NC_024315.1	-	9	2067	168019	170920	Intergenic
XR_003050618.1	112487490	NC_024315.1	-	3	485	5579458	5590829	Intergenic
XR_521989.3	103383145	NC_024315.1	-	9	2076	168018	170920	Intergenic
XR_522059.3	103384021	NC_024315.1	-	4	729	13541818	13551559	Intronic
XR_003050626.1	112487496	NC_024315.1	-	2	1901	1501516	1503472	Intronic
XR_003050557.1	107989072	NC_024315.1	-	3	830	19445455	19446518	Antisense
XR_001760468.2	103383617	NC_024315.1	-	6	2201	6658775	6752866	Intergenic
XR_522042.3	103383897	NC_024315.1	-	3	829	10992318	10993573	Intergenic
XR_003050634.1	112487499	NC_024315.1	-	4	4326	8136372	8141066	Intergenic
XR_003050561.1	112487470	NC_024315.1	-	3	1139	4670599	4673135	Antisense
XR_003050719.1	112487547	NC_024315.1	-	3	2307	4143777	4149108	Intergenic
XR_003050714.1	107989029	NC_024315.1	-	3	3594	4852412	4857910	Intergenic
XR_003050694.1	112487533	NC_024315.1	-	2	1146	13191241	13192476	Intergenic
XR_522067.3	103384055	NC_024315.1	-	3	548	14579597	14585461	Antisense
XR_001760619.2	107989077	NC_024315.1	-	6	648	13779751	13789895	Antisense
XR_521993.3	103383210	NC_024315.1	-	4	625	827029	829097	Intergenic
XR_003050546.1	103384021	NC_024315.1	-	3	6199	13541818	13551559	Intronic
XR_003050611.1	112487487	NC_024315.1	-	3	2317	16325570	16328141	Intergenic
XR_003050664.1	103383617	NC_024315.1	-	7	2294	6658775	6752867	Intergenic
XR_003050522.1	112487446	NC_024315.1	-	3	1047	17051045	17055929	Antisense
XR_003050638.1	103383549	NC_024315.1	-	6	1542	5136519	5146501	Antisense
XR_522007.3	103383351	NC_024315.1	-	3	1195	2765224	2767757	Intergenic
XR_003050663.1	103383617	NC_024315.1	-	8	2410	6658775	6752867	Intergenic
XR_003050740.1	112487556	NC_024315.1	-	1	207	15788068	15788274	Intergenic
XR_003050623.1	112487493	NC_024315.1	-	2	2933	9025432	9028416	Antisense
XR_003050662.1	103383617	NC_024315.1	-	7	2318	6658775	6752867	Intergenic
XR_003050607.1	107989013	NC_024315.1	-	3	554	16970311	16971496	Intergenic
XR_003050671.1	112487518	NC_024315.1	-	2	239	10917116	10917430	Intergenic
XR_003050682.1	112487527	NC_024315.1	-	3	674	1204695	1207268	Antisense
XR_003050602.1	107989014	NC_024315.1	-	10	5271	16717246	16750796	Antisense
XR_003050599.1	112487482	NC_024315.1	-	3	928	17301598	17311258	Intergenic
XR_003050609.1	112487486	NC_024315.1	-	3	437	16335833	16337447	Antisense
XR_003050625.1	112487495	NC_024315.1	-	2	441	1478763	1479300	Antisense
XR_521990.3	103383146	NC_024315.1	-	3	301	173674	179330	Intergenic
XR_003050683.1	112487527	NC_024315.1	-	4	731	1204547	1207268	Antisense
XR_522036.2	103383839	NC_024315.1	-	4	911	10334938	10336320	Intergenic
XR_001760492.2	107989009	NC_024315.1	-	3	1819	996714	999468	Intergenic
XR_003050608.1	103384154	NC_024315.1	-	3	1690	16013987	16019085	Intergenic
XR_003050673.1	112487519	NC_024315.1	-	10	1112	13451355	13474847	Intergenic
XR_003050560.1	112487469	NC_024315.1	-	2	986	4676290	4677515	Intronic
XR_003050742.1	112487558	NC_024315.1	-	1	217	15786130	15786346	Intergenic
XR_003050622.1	112487492	NC_024315.1	-	3	1158	9013894	9015536	Antisense
XR_003050708.1	112487542	NC_024315.1	-	2	1554	12485118	12486950	Intergenic
XR_521987.2	103383139	NC_024315.1	-	2	1331	99012	101983	Intergenic
XR_003050547.1	112487454	NC_024315.1	-	3	709	1824994	1826589	Antisense
XR_003050554.1	103383465	NC_024315.1	-	5	1567	4206310	4209117	Intergenic
XR_001760509.2	107989018	NC_024315.1	-	4	420	16330477	16335261	Antisense
XR_003050640.1	112487501	NC_024315.1	-	3	1396	13564978	13569859	Intergenic
XR_003050674.1	112487520	NC_024315.1	-	3	5443	13474998	13481599	Intergenic
XR_003050578.1	112487478	NC_024315.1	-	2	494	49029	49990	Intergenic
XR_003050533.1	112487450	NC_024315.1	-	2	357	3058688	3059076	Intronic
XR_003050600.1	112487483	NC_024315.1	-	4	853	11057506	11064299	Antisense
XR_003050653.1	112487505	NC_024315.1	-	3	1488	17348383	17351265	Intergenic
XR_003050706.1	112487540	NC_024315.1	-	3	520	11108899	11111889	Antisense
XR_003050704.1	107989030	NC_024315.1	-	3	2972	5816786	5820337	Intergenic
XR_001760530.2	107989034	NC_024315.1	-	5	916	11232838	11281263	Intergenic
XR_003050509.1	107989067	NC_024315.1	-	3	675	2140084	2141401	Antisense
XR_522035.3	103383822	NC_024315.1	-	13	2487	10069791	10194888	Intergenic
XR_003050567.1	107989039	NC_024315.1	-	5	641	1770087	1781265	Antisense
XR_001760526.2	107989030	NC_024315.1	-	3	2952	5816786	5820337	Intergenic
XR_003050556.1	107989072	NC_024315.1	-	2	872	19445455	19446370	Antisense
XR_003050715.1	107989029	NC_024315.1	-	3	3867	4852412	4858426	Intergenic
XR_003050571.1	112487472	NC_024315.1	-	3	856	908595	911839	Antisense
XR_003050551.1	112487455	NC_024315.1	-	2	1817	6883395	6885366	Intergenic
XR_001760497.2	103384142	NC_024315.1	-	5	797	15920326	15923431	Intergenic
XR_003050680.1	112487525	NC_024315.1	-	3	318	12858059	12858911	Antisense
XR_003050521.1	103383822	NC_024315.1	-	14	2514	10069791	10194888	Intergenic
XR_522026.3	103383623	NC_024315.1	-	6	823	6812657	6814328	Intergenic
XR_003050627.1	112487497	NC_024315.1	-	4	765	4439876	4440956	Antisense
XR_003050639.1	103383549	NC_024315.1	-	6	1537	5136472	5146501	Antisense
XR_003050568.1	107989039	NC_024315.1	-	5	611	1770087	1780557	Antisense
XR_001760476.2	103383145	NC_024315.1	-	9	2073	168018	170920	Intergenic
XR_003050677.1	112487523	NC_024315.1	-	3	1558	13677200	13776793	Intergenic
XR_521999.3	103383232	NC_024315.1	-	2	1431	1190866	1192530	Intergenic
XR_003050532.1	112487449	NC_024315.1	-	6	923	3075612	3082111	Antisense
XR_001760548.2	107989040	NC_024315.1	-	3	1443	5567022	5569046	Intergenic
XR_001760479.2	107988996	NC_024315.1	-	3	2904	3010461	3015065	Intergenic
XR_003050687.1	112487530	NC_024315.1	-	2	1224	1256251	1259149	Antisense
XR_001760477.2	103383145	NC_024315.1	-	9	2071	168018	170920	Intergenic
XR_522025.3	103383617	NC_024315.1	-	6	2197	6658775	6752865	Intergenic
XR_003050739.1	112487555	NC_024315.1	-	1	215	15638649	15638863	Intergenic
XR_003050712.1	112487544	NC_024315.1	-	3	2438	15156578	15159568	Intergenic
XR_001760478.2	103383145	NC_024315.1	-	9	2073	168018	170920	Intergenic
XR_522065.3	103384044	NC_024315.1	-	3	608	14497219	14520477	Sense
XR_003050661.1	103383617	NC_024315.1	-	6	2840	6658775	6730305	Intergenic
XR_003050672.1	112487519	NC_024315.1	-	10	1117	13451355	13474847	Intergenic
XR_522011.3	103383425	NC_024315.1	-	2	452	4130768	4131301	Intergenic
XR_522077.3	103384154	NC_024315.1	-	3	1584	16013987	16018841	Intergenic
XR_001760547.2	107989039	NC_024315.1	-	5	637	1770087	1779877	Antisense
XR_001760545.2	107989038	NC_024315.1	-	7	1203	6991765	6999095	Intergenic
XR_003050668.1	112487514	NC_024315.1	-	3	1179	7092597	7094775	Intergenic
XR_521996.3	112486247	NC_024315.1	+	6	2642	1115929	1138124	Antisense
XR_003050558.1	112487467	NC_024315.1	+	2	1271	649036	650341	Intergenic
XR_003050612.1	112487488	NC_024315.1	+	4	1869	17649787	17652922	Antisense
XR_522053.3	103383972	NC_024315.1	+	6	1685	13443201	13447146	Intergenic
XR_003050553.1	112487464	NC_024315.1	+	5	737	12265395	12292161	Intergenic
XR_003050660.1	112487510	NC_024315.1	+	2	3588	17185885	17189513	Intronic
XR_003050631.1	112487498	NC_024315.1	+	3	1452	18177713	18184485	Intergenic
XR_003050695.1	107989019	NC_024315.1	+	2	1505	13274315	13275931	Antisense
XR_001760508.2	107989017	NC_024315.1	+	3	2692	16770390	16776418	Intergenic
XR_003050506.1	103383439	NC_024315.1	+	3	769	3769332	3770908	Intergenic
XR_003050555.1	112487465	NC_024315.1	+	3	1098	1453596	1459134	Antisense
XR_003050615.1	112487488	NC_024315.1	+	4	1449	17649787	17653074	Antisense
XR_003050630.1	112487498	NC_024315.1	+	4	1170	18177724	18184485	Intergenic
XR_003050666.1	107988998	NC_024315.1	+	3	947	3624093	3626794	Antisense
XR_003050670.1	112487517	NC_024315.1	+	2	570	18893718	18894320	Antisense
XR_522072.3	103384076	NC_024315.1	+	4	4773	15151096	15166357	Intergenic
XR_003050614.1	112487488	NC_024315.1	+	4	1457	17649787	17653085	Antisense
XR_003050689.1	112487531	NC_024315.1	+	3	1253	6854353	6856576	Intergenic
XR_001760580.2	107989053	NC_024315.1	+	2	652	7142403	7143597	Antisense
XR_001760523.2	107989027	NC_024315.1	+	3	1517	15665185	15668550	Intergenic
XR_003050589.1	112487480	NC_024315.1	+	5	561	6557868	6571922	Antisense
XR_003050606.1	103384214	NC_024315.1	+	5	1797	16952118	16954599	Intergenic
XR_003050596.1	107989059	NC_024315.1	+	9	2323	1414213	1422750	Antisense
XR_003050632.1	112487498	NC_024315.1	+	4	1337	18177715	18184485	Intergenic
XR_003050665.1	112487512	NC_024315.1	+	2	2887	6752946	6756282	Intergenic
XR_003050697.1	112487535	NC_024315.1	+	3	1130	1004084	1008720	Intergenic
XR_003050659.1	112487509	NC_024315.1	+	2	2020	425928	428686	Intergenic
XR_003050584.1	103383909	NC_024315.1	+	5	3142	12470660	12479275	Antisense
XR_003050648.1	112487504	NC_024315.1	+	5	3034	7078092	7083544	Antisense
XR_003050595.1	107989059	NC_024315.1	+	11	2563	1412926	1422750	Antisense
XR_003050686.1	112487529	NC_024315.1	+	2	1365	1141826	1143286	Intronic
XR_003050594.1	107989059	NC_024315.1	+	10	2498	1412929	1422750	Antisense
XR_003050507.1	112487443	NC_024315.1	+	3	893	3772955	3777016	Intergenic
XR_001760522.2	107989026	NC_024315.1	+	3	3130	15426151	15522330	Intergenic
XR_003050582.1	103383905	NC_024315.1	+	16	3015	12429896	12470635	Antisense
XR_003050718.1	112487546	NC_024315.1	+	3	1543	2941168	2945204	Intergenic
XR_003050657.1	112487508	NC_024315.1	+	2	1912	734345	736298	Intronic
XR_003050624.1	112487494	NC_024315.1	+	2	863	6128493	6129851	Intergenic
XR_003050616.1	112487488	NC_024315.1	+	4	1793	17649787	17652922	Antisense
XR_003050702.1	112487537	NC_024315.1	+	2	395	3233251	3233779	Intergenic
XR_001760591.2	107989059	NC_024315.1	+	8	2262	1414552	1422750	Antisense
XR_003050643.1	112487504	NC_024315.1	+	6	2981	7078092	7083544	Antisense
XR_001760516.2	103383487	NC_024315.1	+	5	1664	4625384	4629349	Intergenic
XR_003050592.1	107989059	NC_024315.1	+	11	2566	1412926	1422750	Antisense
XR_003050667.1	112487513	NC_024315.1	+	3	2210	3610518	3613179	Antisense
XR_522087.3	103384214	NC_024315.1	+	5	891	16952106	16954135	Intergenic
XR_003050585.1	103383909	NC_024315.1	+	6	3328	12470660	12479275	Antisense
XR_003050717.1	103383426	NC_024315.1	+	4	432	4130136	4132573	Intergenic
XR_003050617.1	112487489	NC_024315.1	+	3	1005	17646033	17649100	Antisense
XR_003050642.1	112487503	NC_024315.1	+	2	1170	5097936	5100740	Intergenic
XR_003050587.1	103383864	NC_024315.1	+	5	1980	11396634	11418693	Intergenic
XR_001760587.2	107989056	NC_024315.1	+	2	820	3538131	3538982	Intronic
XR_003050647.1	112487504	NC_024315.1	+	5	2931	7078092	7083544	Antisense
XR_003050701.1	112487536	NC_024315.1	+	3	377	3271554	3272825	Antisense
XR_003050610.1	103384174	NC_024315.1	+	3	744	16313746	16319958	Antisense
XR_001760520.2	107989025	NC_024315.1	+	3	2138	15668655	15671523	Intergenic
XR_003050635.1	112487500	NC_024315.1	+	4	534	8132479	8144243	Antisense
XR_003050575.1	112487475	NC_024315.1	+	2	1359	3592999	3594506	Intergenic
XR_003050693.1	103383972	NC_024315.1	+	6	1681	13443201	13447146	Intergenic
XR_001760483.2	107988998	NC_024315.1	+	3	935	3624102	3626794	Antisense
XR_003050603.1	103384214	NC_024315.1	+	10	4179	16933293	16954606	Antisense
XR_522068.2	103384068	NC_024315.1	+	3	329	14825390	14826383	Intergenic
XR_003050510.1	112487445	NC_024315.1	+	2	1431	3458818	3460351	Intronic
XR_001760474.2	107988995	NC_024315.1	+	2	681	4136839	4137632	Intergenic
XR_003050652.1	112487504	NC_024315.1	+	7	2448	7078092	7083544	Antisense
XR_003050645.1	112487504	NC_024315.1	+	7	3113	7078092	7083544	Antisense
XR_003050586.1	103383909	NC_024315.1	+	5	3752	12472817	12479275	Antisense
XR_003050644.1	112487504	NC_024315.1	+	6	2997	7078092	7083544	Antisense
XR_003050613.1	112487488	NC_024315.1	+	4	2483	17649787	17652922	Antisense
XR_003050583.1	103383905	NC_024315.1	+	16	3000	12429896	12470635	Antisense
XR_003050633.1	112487498	NC_024315.1	+	4	1169	18177721	18184485	Intergenic
XR_003050741.1	112487557	NC_024315.1	+	1	205	15780559	15780763	Intronic
XR_001760604.2	107989070	NC_024315.1	+	2	890	9604302	9606485	Intergenic
XR_003050537.1	112487452	NC_024315.1	+	4	499	7182263	7189477	Antisense
XR_003050590.1	112487480	NC_024315.1	+	5	570	6557868	6572044	Antisense
XR_522023.2	103383554	NC_024315.1	+	3	500	5743887	5776842	Intergenic
XR_003050598.1	107989059	NC_024315.1	+	10	2311	1412926	1422750	Antisense
XR_003050700.1	112487536	NC_024315.1	+	3	380	3271554	3273663	Antisense
XR_003050536.1	112487452	NC_024315.1	+	4	591	7182263	7189477	Antisense
XR_003050573.1	112487474	NC_024315.1	+	2	261	318889	322088	Antisense
XR_003050658.1	103383772	NC_024315.1	+	6	4827	9362621	9368030	Intergenic
XR_003050703.1	112487538	NC_024315.1	+	3	431	3268141	3269452	Antisense
XR_003050651.1	112487504	NC_024315.1	+	6	2922	7078092	7083544	Antisense
XR_003050707.1	112487541	NC_024315.1	+	4	371	7711027	7712615	Antisense
XR_003050525.1	112487447	NC_024315.1	+	3	4751	17259873	17264874	Intergenic
XR_003050605.1	103384214	NC_024315.1	+	11	3086	16933305	16954604	Antisense
XR_522100.3	103384299	NC_024315.1	+	3	1658	18625430	18627487	Intergenic
XR_003050576.1	112487476	NC_024315.1	+	3	303	9218443	9223283	Antisense
XR_003050649.1	112487504	NC_024315.1	+	7	2972	7078092	7083544	Antisense
XR_003050593.1	107989059	NC_024315.1	+	11	2522	1412926	1425817	Antisense
XR_001760596.2	107989065	NC_024315.1	+	4	1274	4094978	4097322	Intronic
XR_001760506.2	107989016	NC_024315.1	+	4	1151	15919161	15921908	Intergenic
XR_003050684.1	112486247	NC_024315.1	+	5	2731	1115929	1138124	Antisense
XR_522018.3	103383487	NC_024315.1	+	4	1741	4625384	4629343	Intergenic
XR_001760524.2	107989028	NC_024315.1	+	4	3073	15640321	15645813	Antisense
XR_003050669.1	112487515	NC_024315.1	+	3	1072	7101824	7103675	Intergenic
XR_001760470.2	103383972	NC_024315.1	+	7	1544	13443201	13447146	Intergenic
XR_003050580.1	103383905	NC_024315.1	+	16	2972	12429896	12470635	Antisense
XR_522043.3	103383905	NC_024315.1	+	16	2987	12429896	12470635	Antisense
XR_003050572.1	112487473	NC_024315.1	+	2	659	9691911	9692766	Intronic
XR_003050597.1	107989059	NC_024315.1	+	9	2299	1414213	1422750	Antisense
XR_001760491.2	112486247	NC_024315.1	+	3	2300	1123439	1138124	Antisense
XR_003050650.1	112487504	NC_024315.1	+	8	3104	7078092	7083544	Antisense
XR_003050588.1	112487479	NC_024315.1	+	3	662	6572918	6578997	Antisense
XR_001760498.2	103384214	NC_024315.1	+	10	2770	16933313	16954602	Antisense
XR_003050581.1	103383905	NC_024315.1	+	16	2977	12429896	12470635	Antisense
XR_003050685.1	112486247	NC_024315.1	+	4	2285	1123439	1138445	Antisense
XR_003050562.1	103383432	NC_024315.1	+	3	816	3872061	3955170	Antisense
XR_522088.3	103384221	NC_024315.1	+	3	463	16963957	16966359	Intergenic
XR_003050591.1	112487481	NC_024315.1	+	2	1871	17394913	17396885	Intergenic
XR_003050621.1	112487491	NC_024315.1	+	2	229	17798202	17800283	Antisense
XR_003050710.1	112487543	NC_024315.1	+	3	2517	816165	819568	Intergenic
XR_003050540.1	112487453	NC_024315.1	+	2	527	4507121	4507689	Intronic
XR_003050604.1	103384214	NC_024315.1	+	10	4175	16933292	16954606	Antisense
XR_003050646.1	112487504	NC_024315.1	+	6	2410	7078092	7082257	Antisense
XR_522085.3	103384214	NC_024315.1	+	5	1300	16952141	16954133	Intergenic
XR_003049195.1	107988256	NW_007594090.1	+	3	221	1	485	Intergenic
XR_001759841.2	107988256	NW_007594090.1	+	3	223	1	482	Intergenic
XR_523624.2	103399321	NW_007587318.1	-	3	440	171	772	Intergenic
XR_001759815.2	107988146	NW_007585344.1	-	2	581	688	1909	Intergenic
XR_003049211.1	112486745	NW_007601194.1	+	2	222	1	299	Intergenic
XR_523630.2	103399380	NW_007587957.1	-	3	350	157	807	Intergenic
XR_003050857.1	112487599	NC_024307.1	-	4	613	20465008	20488282	Antisense
XR_003050886.1	112487620	NC_024307.1	-	3	610	4248025	4248825	Intergenic
XR_003051681.1	112488022	NC_024307.1	-	2	350	94695	96865	Intergenic
XR_003051146.1	112487750	NC_024307.1	-	2	1163	23150319	23158853	Antisense
XR_003051579.1	112487965	NC_024307.1	-	4	2770	13861204	13874189	Intergenic
XR_522442.3	103387599	NC_024307.1	-	5	2447	26110477	26169553	Intergenic
XR_003049543.1	112486937	NC_024307.1	-	2	703	20288542	20289281	Antisense
XR_003052014.1	112488181	NC_024307.1	-	4	536	19852992	19856131	Antisense
XR_003051180.1	112487769	NC_024307.1	-	2	400	32158947	32159452	Intronic
XR_001760328.2	107988826	NC_024307.1	-	2	428	29079068	29081477	Intergenic
XR_001760154.2	107988683	NC_024307.1	-	3	1455	21345618	21348086	Intergenic
XR_003052409.1	112488396	NC_024307.1	-	2	2331	11062494	11064887	Intergenic
XR_003049393.1	112486845	NC_024307.1	-	5	1121	33454723	33498099	Antisense
XR_003049948.1	112487138	NC_024307.1	-	3	623	17552040	17554516	Intergenic
XR_003049942.1	103382137	NC_024307.1	-	6	2330	16186275	16192868	Antisense
XR_003051376.1	112487876	NC_024307.1	-	2	411	10662976	10663421	Intergenic
XR_003049992.1	112487163	NC_024307.1	-	7	3781	25356581	25390034	Antisense
XR_003052082.1	112488234	NC_024307.1	-	1	215	26648733	26648947	Intergenic
XR_003050505.1	112487442	NC_024307.1	-	4	621	320039	323851	Antisense
XR_003049228.1	112486761	NC_024307.1	-	3	1500	12329830	12342606	Intergenic
XR_003048999.1	112486515	NC_024307.1	-	8	1310	29692265	29713559	Antisense
XR_003051018.1	112487694	NC_024307.1	-	3	559	340954	344008	Antisense
XR_003051193.1	107988564	NC_024307.1	-	5	2620	19536595	19585613	Intergenic
XR_522652.3	103390052	NC_024307.1	-	5	361	4243406	4245342	Intergenic
XR_003050479.1	112487422	NC_024307.1	-	2	1202	13372823	13374099	Antisense
XR_003051716.1	112488041	NC_024307.1	-	2	2456	33820675	33823231	Intergenic
XR_522755.3	103391037	NC_024307.1	-	2	3304	32091095	32094551	Intergenic
XR_003050488.1	112487427	NC_024307.1	-	2	4569	7531524	7542393	Antisense
XR_001760148.2	107988677	NC_024307.1	-	3	623	28663318	28666668	Antisense
XR_001760364.2	107988858	NC_024307.1	-	5	631	23137157	23140924	Antisense
XR_003051192.1	107988564	NC_024307.1	-	6	1933	19536156	19585613	Intergenic
XR_001760216.2	107988715	NC_024307.1	-	4	1227	12172076	12192237	Antisense
XR_003050186.1	107989423	NC_024307.1	-	4	792	10366115	10367533	Antisense
XR_001760611.2	103382137	NC_024307.1	-	6	2289	16186305	16192868	Antisense
XR_003050185.1	107989423	NC_024307.1	-	3	905	10366115	10367533	Antisense
XR_003049153.1	112486595	NC_024307.1	-	5	575	29713741	29721202	Antisense
XR_522654.2	103390104	NC_024307.1	-	5	949	4241011	4242660	Intergenic
XR_521528.3	103378755	NC_024307.1	-	2	1477	10753937	10756887	Intergenic
XR_003050055.1	112487197	NC_024307.1	-	3	240	5388318	5391659	Antisense
XR_003050577.1	112487477	NC_024307.1	-	2	1772	26365212	26367062	Intergenic
XR_003049231.1	112486767	NC_024307.1	-	2	816	24123081	24124759	Antisense
XR_001760252.2	103379811	NC_024307.1	-	3	772	12697831	12722932	Antisense
XR_003051541.1	112487949	NC_024307.1	-	4	2703	14211339	14228260	Intergenic
XR_521614.3	103379811	NC_024307.1	-	3	1739	12701607	12722932	Antisense
XR_003049991.1	112487163	NC_024307.1	-	7	3785	25356581	25390033	Antisense
XR_003049067.1	112486570	NC_024307.1	-	3	1683	23060415	23064208	Antisense
XR_003051469.1	112487917	NC_024307.1	-	3	5006	31961326	31972723	Intergenic
XR_003051323.1	103389574	NC_024307.1	-	3	2944	28673052	28678417	Antisense
XR_003052357.1	103389236	NC_024307.1	-	3	473	28164102	28177078	Antisense
XR_003049935.1	112487133	NC_024307.1	-	3	3092	17826958	17831762	Antisense
XR_003051027.1	112487699	NC_024307.1	-	2	5927	4120752	4126825	Intronic
XR_522498.2	103388234	NC_024307.1	-	2	1485	27087579	27089105	Intergenic
XR_003051471.1	112487919	NC_024307.1	-	2	7451	32059927	32067478	Intronic
XR_003050853.1	112487601	NC_024307.1	-	3	633	29231525	29274070	Intergenic
XR_003049954.1	112487144	NC_024307.1	-	4	773	18132452	18135321	Intergenic
XR_003048881.1	107989020	NC_024307.1	-	2	632	5103976	5105331	Intergenic
XR_003050057.1	112487197	NC_024307.1	-	3	266	5388318	5391753	Antisense
XR_003050579.1	112487477	NC_024307.1	-	2	1561	26365212	26367047	Intergenic
XR_003051753.1	112488056	NC_024307.1	-	3	1429	22491667	22493203	Intronic
XR_003049938.1	112487135	NC_024307.1	-	4	1637	18506885	18520235	Intergenic
XR_003049936.1	112487134	NC_024307.1	-	3	5040	17097132	17103364	Intergenic
XR_001761016.2	107989442	NC_024307.1	-	2	1142	14032132	14033314	Intergenic
XR_003049822.1	112487089	NC_024307.1	-	3	5810	31246789	31260986	Intronic
XR_001760210.2	103378381	NC_024307.1	-	3	315	10198025	10201881	Antisense
XR_003049929.1	107988885	NC_024307.1	-	4	516	15970865	15974291	Antisense
XR_003052061.1	112488218	NC_024307.1	-	1	215	26647786	26648000	Intergenic
XR_003050790.1	112487582	NC_024307.1	-	2	1774	2452333	2454162	Intronic
XR_001760041.2	107988564	NC_024307.1	-	3	2537	19581636	19585613	Intergenic
XR_003050933.1	112487641	NC_024307.1	-	4	1054	32383186	32435926	Intergenic
XR_003049933.1	112487133	NC_024307.1	-	2	3447	17826958	17831762	Antisense
XR_003051580.1	112487965	NC_024307.1	-	5	2331	13864063	13879153	Intergenic
XR_003051318.1	112486251	NC_024307.1	-	2	667	28556676	28558001	Intergenic
XR_003051017.1	112487694	NC_024307.1	-	2	773	341024	342623	Intergenic
XR_003049961.1	112487151	NC_024307.1	-	3	2110	33634954	33638431	Antisense
XR_003049934.1	112487133	NC_024307.1	-	3	3071	17826958	17831762	Antisense
XR_001760193.1	107988701	NC_024307.1	-	2	286	26218858	26220433	Intergenic
XR_003051019.1	112487694	NC_024307.1	-	4	664	341024	344008	Antisense
XR_521931.3	103382469	NC_024307.1	-	3	1570	16834023	16835782	Antisense
XR_003049952.1	112487142	NC_024307.1	-	2	302	15475134	15475585	Antisense
XR_003051740.1	112488050	NC_024307.1	-	2	1598	26608071	26610253	Intergenic
XR_003051147.1	107988858	NC_024307.1	-	5	866	23137157	23140924	Antisense
XR_003050420.1	112487372	NC_024307.1	-	2	1056	2636276	2637387	Intergenic
XR_003049217.1	112486682	NC_024307.1	-	4	767	29721283	29725739	Antisense
XR_003049937.1	112487135	NC_024307.1	-	3	2377	18510339	18520235	Intergenic
XR_003050396.1	112487354	NC_024307.1	-	4	439	26691435	26692568	Antisense
XR_003050504.1	112487442	NC_024307.1	-	4	654	320035	323851	Antisense
XR_003050430.1	112487379	NC_024307.1	-	3	3107	7130893	7139591	Antisense
XR_522386.3	103387062	NC_024307.1	-	4	558	25423501	25432732	Intergenic
XR_003049392.1	112486845	NC_024307.1	-	4	1205	33454723	33495464	Antisense
XR_001760098.2	103385176	NC_024307.1	-	2	630	3217351	3218689	Intergenic
XR_003051578.1	112487965	NC_024307.1	-	4	3725	13864063	13874193	Intergenic
XR_003049055.1	112486515	NC_024307.1	-	7	1207	29692265	29713559	Antisense
XR_003051742.1	112488050	NC_024307.1	-	3	2137	26608071	26611731	Intergenic
XR_003049928.1	107988885	NC_024307.1	-	5	687	15970865	15974286	Antisense
XR_003051773.1	112488064	NC_024307.1	-	3	2358	4923959	4952348	Intergenic
XR_521883.3	103382157	NC_024307.1	-	4	887	16195820	16198491	Antisense
XR_003051819.1	112488090	NC_024307.1	-	3	1411	12131	38768	Intergenic
XR_003049930.1	107988885	NC_024307.1	-	5	694	15970865	15974286	Antisense
XR_003050787.1	112487580	NC_024307.1	-	3	1205	2289134	2316668	Intergenic
XR_003051436.1	103387599	NC_024307.1	-	5	2285	26110477	26169553	Intergenic
XR_003049407.1	112486850	NC_024307.1	-	3	2230	18622027	18625280	Intergenic
XR_522710.3	103390653	NC_024307.1	-	4	1413	30196226	30217052	Intergenic
XR_003049950.1	112487141	NC_024307.1	-	3	440	16182400	16186201	Antisense
XR_001760410.2	107988885	NC_024307.1	-	7	860	15968514	15974286	Antisense
XR_003052090.1	112488238	NC_024307.1	-	1	214	26646847	26647060	Intergenic
XR_003051741.1	112488050	NC_024307.1	-	3	1547	26608071	26610280	Intergenic
XR_003051434.1	103387599	NC_024307.1	-	5	711	26123882	26169553	Intergenic
XR_003050880.1	112487617	NC_024307.1	-	2	2927	3632442	3635403	Antisense
XR_522051.3	103383960	NC_024307.1	-	2	1390	19751435	19752906	Intergenic
XR_003051748.1	112488054	NC_024307.1	-	3	3896	9616486	9644741	Intergenic
XR_003051191.1	107988564	NC_024307.1	-	5	2039	19536156	19585613	Intergenic
XR_003050887.1	103389969	NC_024307.1	-	3	512	4248890	4250134	Intergenic
XR_003051026.1	107989041	NC_024307.1	-	5	1380	4087369	4105568	Antisense
XR_001760744.2	107989233	NC_024307.1	-	3	256	21599853	21605650	Intergenic
XR_003051322.1	107989249	NC_024307.1	-	3	429	28389299	28390504	Antisense
XR_001760365.2	107988859	NC_024307.1	-	4	516	23131782	23136823	Antisense
XR_521477.3	103378111	NC_024307.1	-	4	1998	8904086	8908228	Intergenic
XR_003049285.1	112486798	NC_024307.1	-	2	720	7204665	7205756	Antisense
XR_003051540.1	112487948	NC_024307.1	-	2	469	2471643	2472216	Intergenic
XR_003049956.1	112487148	NC_024307.1	+	3	2068	16611914	16615303	Intergenic
XR_003049931.1	112487131	NC_024307.1	+	2	2182	17518701	17522039	Intergenic
XR_001760109.2	107988611	NC_024307.1	+	3	746	10486516	10497990	Intergenic
XR_003049932.1	112487132	NC_024307.1	+	3	688	16016597	16018631	Intergenic
XR_003052295.1	112488333	NC_024307.1	+	2	1480	12187533	12189961	Intergenic
XR_003050789.1	112487581	NC_024307.1	+	2	901	1733036	1735212	Intergenic
XR_001760458.2	107988909	NC_024307.1	+	3	745	26644301	26645738	Antisense
XR_003051708.1	112488037	NC_024307.1	+	7	9445	24526844	24852424	Antisense
XR_522738.3	103390820	NC_024307.1	+	2	1202	29652731	29654438	Intronic
XR_003051489.1	103378329	NC_024307.1	+	4	1198	9380553	9391718	Intergenic
XR_003050534.1	112487451	NC_024307.1	+	2	2162	13426398	13430422	Intergenic
XR_522435.3	103387537	NC_024307.1	+	4	3540	26007262	26022004	Intergenic
XR_003051794.1	112488076	NC_024307.1	+	2	2316	22810245	22812607	Intronic
XR_522108.3	103384447	NC_024307.1	+	5	4485	20410759	20415798	Intergenic
XR_001761007.2	103378551	NC_024307.1	+	5	794	9740625	9743414	Intronic
XR_522005.2	103383327	NC_024307.1	+	3	711	18429317	18430476	Intronic
XR_003048698.1	112486292	NC_024307.1	+	2	985	5638642	5639812	Intronic
XR_003050656.1	112487502	NC_024307.1	+	3	223	34453319	34458731	Intergenic
XR_003050564.1	103390217	NC_024307.1	+	4	716	31471180	31475988	Intergenic
XR_003051705.1	112488037	NC_024307.1	+	6	10662	24723584	24852424	Antisense
XR_003051626.1	112487981	NC_024307.1	+	3	514	9022218	9023737	Antisense
XR_003051043.1	112487704	NC_024307.1	+	3	236	11766316	11767154	Antisense
XR_003051848.1	112488106	NC_024307.1	+	3	1370	20072591	20075663	Intergenic
XR_003051041.1	103379658	NC_024307.1	+	9	1734	11789485	11792259	Intergenic
XR_001760211.2	107988711	NC_024307.1	+	4	415	5241938	5245393	Intergenic
XR_001760049.2	107988569	NC_024307.1	+	2	376	28052203	28052798	Intronic
XR_003051923.1	112488145	NC_024307.1	+	4	1024	10448015	10464470	Intergenic
XR_003053093.1	112488714	NC_024307.1	+	3	437	32806044	32807897	Antisense
XR_003049500.1	112486921	NC_024307.1	+	4	349	2591400	2593018	Antisense
XR_003050451.1	112487391	NC_024307.1	+	2	2439	4176451	4178933	Intergenic
XR_521494.3	103378329	NC_024307.1	+	4	440	9380553	9389189	Intergenic
XR_003049435.1	112486866	NC_024307.1	+	3	1504	29081432	29084356	Intergenic
XR_003051181.1	112487770	NC_024307.1	+	3	1336	32169675	32179557	Antisense
XR_003051701.1	112488035	NC_024307.1	+	3	281	13817282	13820359	Antisense
XR_001761042.2	107989487	NC_024307.1	+	3	343	5447531	5449724	Antisense
XR_001760986.2	107989427	NC_024307.1	+	3	1005	28247307	28253070	Antisense
XR_003051710.1	112488037	NC_024307.1	+	6	9616	24695945	24852424	Antisense
XR_003050444.1	103384127	NC_024307.1	+	8	461	20026539	20028536	Intergenic
XR_003050535.1	112487451	NC_024307.1	+	3	2044	13424590	13430422	Intergenic
XR_521447.3	103377800	NC_024307.1	+	5	2005	8090376	8116907	Antisense
XR_521409.3	103377370	NC_024307.1	+	3	230	1442797	1443796	Sense
XR_003051890.1	112488133	NC_024307.1	+	2	1809	20868887	20871699	Antisense
XR_003049957.1	112487149	NC_024307.1	+	2	7719	17089147	17097031	Intergenic
XR_003050786.1	112487579	NC_024307.1	+	2	1690	2077568	2079342	Intergenic
XR_003051500.1	112487932	NC_024307.1	+	3	1752	21599731	21605532	Intergenic
XR_003051321.1	112487842	NC_024307.1	+	2	464	28633476	28634086	Intergenic
XR_521976.3	103382995	NC_024307.1	+	3	1188	17842939	17851095	Antisense
XR_001760734.2	107989227	NC_024307.1	+	8	2333	19978135	19985235	Antisense
XR_522499.2	103388242	NC_024307.1	+	2	373	27088766	27089193	Intergenic
XR_003051709.1	112488037	NC_024307.1	+	6	9127	24690955	24852424	Antisense
XR_003051775.1	112488065	NC_024307.1	+	2	1817	14454045	14456244	Intergenic
XR_003049306.1	112486817	NC_024307.1	+	2	3329	8263746	8267105	Intergenic
XR_003052007.1	112488178	NC_024307.1	+	2	2944	33919346	33922341	Intronic
XR_003050688.1	112487528	NC_024307.1	+	2	1044	26845513	26846877	Antisense
XR_003051425.1	103391638	NC_024307.1	+	3	586	33735707	33742693	Antisense
XR_003050563.1	103390217	NC_024307.1	+	5	1445	31471220	31475988	Intergenic
XR_523742.2	103399980	NC_024307.1	+	4	1279	6248492	6281111	Antisense
XR_521518.2	103378551	NC_024307.1	+	5	711	9741246	9743414	Intronic
XR_003051225.1	112487799	NC_024307.1	+	5	1855	25206110	25208585	Sense
XR_003051980.1	112488170	NC_024307.1	+	5	1691	24293841	24344020	Antisense
XR_003051891.1	103390214	NC_024307.1	+	3	807	31478901	31480980	Intergenic
XR_003050471.1	112487405	NC_024307.1	+	3	1207	5941985	5944489	Intergenic
XR_003050868.1	107989227	NC_024307.1	+	9	2120	19978135	19985235	Antisense
XR_003053094.1	112488717	NC_024307.1	+	3	417	32808002	32810956	Antisense
XR_003049387.1	112486841	NC_024307.1	+	3	5731	9416015	9445780	Antisense
XR_003051744.1	112488051	NC_024307.1	+	3	1801	26074414	26081907	Intergenic
XR_003050784.1	112487577	NC_024307.1	+	2	209	1778763	1779002	Intergenic
XR_003052408.1	112488395	NC_024307.1	+	2	239	10936539	10936830	Intronic
XR_001759861.2	107988304	NC_024307.1	+	2	351	34165768	34166700	Intronic
XR_001761020.2	107989472	NC_024307.1	+	4	504	23400046	23413648	Antisense
XR_003050565.1	103390217	NC_024307.1	+	5	1427	31471220	31475988	Intergenic
XR_003050937.1	112487642	NC_024307.1	+	2	1181	9523360	9525837	Intergenic
XR_003050867.1	112487610	NC_024307.1	+	4	1353	19985769	19989440	Antisense
XR_003049223.1	112486757	NC_024307.1	+	3	541	7278976	7280873	Intergenic
XR_003051922.1	112488145	NC_024307.1	+	3	1156	10448015	10457946	Intergenic
XR_003051165.1	112487760	NC_024307.1	+	2	936	33797570	33798539	Intronic
XR_001760150.2	107988679	NC_024307.1	+	3	407	28646013	28650097	Antisense
XR_003051224.1	112487799	NC_024307.1	+	4	1920	25206110	25208585	Sense
XR_003050552.1	112487463	NC_024307.1	+	3	796	8994373	9018861	Antisense
XR_003049279.1	112486794	NC_024307.1	+	2	362	13083093	13084880	Antisense
XR_003051849.1	112488106	NC_024307.1	+	3	1321	20072591	20075661	Intergenic
XR_003051096.1	112487735	NC_024307.1	+	2	986	25609686	25611031	Intergenic
XR_003050342.1	112487329	NC_024307.1	+	2	1332	22656833	22658211	Intronic
XR_003050570.1	107989477	NC_024307.1	+	3	2739	23871854	23874804	Intergenic
XR_003052006.1	112488177	NC_024307.1	+	2	2789	33939269	33942107	Intergenic
XR_521634.3	103380070	NC_024307.1	+	3	551	13561294	13615357	Intergenic
XR_521928.3	103382437	NC_024307.1	+	3	385	16779139	16811967	Antisense
XR_003050155.1	103386758	NC_024307.1	+	8	1656	24863934	25100588	Intergenic
XR_003050785.1	112487578	NC_024307.1	+	3	341	1751831	1752297	Intergenic
XR_001760022.2	107988553	NC_024307.1	+	3	2233	27031801	27036958	Antisense
XR_001759987.1	107988500	NC_024307.1	+	2	461	20297311	20297899	Intergenic
XR_001760761.2	107989244	NC_024307.1	+	4	1049	5724952	5737905	Intergenic
XR_003051976.1	112488170	NC_024307.1	+	5	3145	24293841	24300734	Antisense
XR_003049579.1	112486953	NC_024307.1	+	2	956	31127467	31129716	Intronic
XR_001760981.2	103389050	NC_024307.1	+	4	2076	28349040	28351474	Intergenic
XR_003049478.1	112486907	NC_024307.1	+	2	1185	8816273	8817502	Intergenic
XR_003050168.1	112487242	NC_024307.1	+	4	1002	14089596	14104911	Antisense
XR_003049941.1	112487137	NC_024307.1	+	2	888	17902043	17904197	Antisense
XR_003051200.1	112487780	NC_024307.1	+	4	2023	28081527	28083851	Intergenic
XR_003050414.1	112487369	NC_024307.1	+	4	2614	24245233	24256739	Antisense
XR_003051729.1	112488047	NC_024307.1	+	3	5387	23598782	23606639	Antisense
XR_003051959.1	112488163	NC_024307.1	+	3	1157	32965664	32967732	Intergenic
XR_001759836.1	107988216	NW_007588782.1	+	2	376	10	480	Intergenic
XR_003049172.1	112486677	NW_007590535.1	+	2	527	15	626	Intergenic
XR_003049001.1	103398489	NW_007585112.1	+	5	901	85138	86621	Intergenic
XR_523499.3	103398450	NW_007585112.1	+	4	2151	153	3415	Antisense
XR_003049000.1	103398489	NW_007585112.1	+	4	1069	85138	86621	Intergenic
XR_003049002.1	112486545	NW_007585112.1	+	3	727	86738	87836	Intergenic
XR_523646.3	103399511	NW_007589523.1	-	3	391	20	678	Intergenic
XR_003049192.1	112486715	NW_007593558.1	-	2	285	124	497	Intergenic
XR_003051545.1	112487951	NC_024319.1	-	4	458	2244616	2249016	Antisense
XR_001760963.2	107989417	NC_024319.1	-	2	808	21543160	21544056	Intronic
XR_001760978.1	107989424	NC_024319.1	-	2	2230	5687751	5690127	Intergenic
XR_522480.3	103387984	NC_024319.1	-	3	839	1703281	1709201	Antisense
XR_003051470.1	112487918	NC_024319.1	-	3	442	16022070	16023216	Antisense
XR_003051539.1	112487946	NC_024319.1	-	3	605	3592435	3593980	Antisense
XR_003051589.1	112487970	NC_024319.1	-	2	550	17908966	17909646	Intergenic
XR_003051605.1	103388530	NC_024319.1	-	5	5314	10376042	10401819	Intergenic
XR_003051603.1	112487974	NC_024319.1	-	3	1984	14472737	14517313	Antisense
XR_522525.3	103388627	NC_024319.1	-	8	3321	12339953	12381147	Intergenic
XR_001760999.2	107989435	NC_024319.1	-	3	776	17650796	17654127	Antisense
XR_001761015.2	107989441	NC_024319.1	-	7	2016	20126258	20148688	Intergenic
XR_003051612.1	112487978	NC_024319.1	-	3	612	13348154	13391326	Intergenic
XR_003051504.1	112487934	NC_024319.1	-	9	1621	7316658	7326728	Antisense
XR_003051660.1	112488001	NC_024319.1	-	1	297	2181816	2182112	Intronic
XR_003051606.1	103388530	NC_024319.1	-	5	5276	10376042	10401806	Intergenic
XR_003051564.1	112487961	NC_024319.1	-	2	2097	6900271	6902494	Antisense
XR_003051448.1	112487906	NC_024319.1	-	3	889	67312	69614	Antisense
XR_003051446.1	103387991	NC_024319.1	-	4	2479	1582692	1585711	Intergenic
XR_003051607.1	103388530	NC_024319.1	-	4	6179	10376042	10397693	Intergenic
XR_522470.3	103387879	NC_024319.1	-	5	2197	589807	671755	Intergenic
XR_003051486.1	107988070	NC_024319.1	-	5	1576	15162569	15165817	Intergenic
XR_003051474.1	112487920	NC_024319.1	-	2	1292	10838244	10839619	Intergenic
XR_003051502.1	112487934	NC_024319.1	-	8	1602	7316660	7326728	Antisense
XR_003051547.1	107989441	NC_024319.1	-	6	2341	20126258	20148688	Intergenic
XR_003051518.1	112487936	NC_024319.1	-	3	7330	20045245	20059595	Intergenic
XR_003051609.1	112487975	NC_024319.1	-	3	2100	10419706	10422142	Intronic
XR_522482.3	103387989	NC_024319.1	-	4	787	1606181	1611648	Intergenic
XR_003051461.1	112487912	NC_024319.1	-	3	434	3947349	3948852	Antisense
XR_003051649.1	112487992	NC_024319.1	-	2	860	17635745	17636672	Antisense
XR_003051501.1	112487934	NC_024319.1	-	8	1532	7316662	7326728	Antisense
XR_003051561.1	112487959	NC_024319.1	-	3	570	19381053	19388063	Intergenic
XR_003051488.1	107988070	NC_024319.1	-	6	1461	15161309	15165918	Intergenic
XR_522468.1	103387878	NC_024319.1	-	2	243	587546	587894	Intergenic
XR_003051544.1	112487951	NC_024319.1	-	4	459	2244618	2249016	Antisense
XR_003051476.1	112487922	NC_024319.1	-	3	710	15589055	15594851	Antisense
XR_003051594.1	107989434	NC_024319.1	-	4	664	8059864	8062157	Antisense
XR_001760958.2	103387879	NC_024319.1	-	5	1475	587940	671755	Intergenic
XR_003051644.1	112487989	NC_024319.1	-	4	2910	19462703	19467759	Intergenic
XR_003051659.1	112488000	NC_024319.1	-	1	292	2180733	2181024	Intronic
XR_003051646.1	112487990	NC_024319.1	-	2	1245	17697346	17698679	Intergenic
XR_003051593.1	107989434	NC_024319.1	-	3	865	8059864	8062087	Antisense
XR_003051449.1	112487906	NC_024319.1	-	3	621	67312	68390	Antisense
XR_003051632.1	112487987	NC_024319.1	-	4	1512	3786347	3809366	Intergenic
XR_003051625.1	103388541	NC_024319.1	-	4	2233	10005158	10038621	Intergenic
XR_522517.3	103388541	NC_024319.1	-	4	782	9979126	10038621	Intergenic
XR_003051633.1	112487988	NC_024319.1	-	2	346	3128828	3129225	Antisense
XR_003051627.1	112487982	NC_024319.1	-	9	1059	21716137	21720754	Intergenic
XR_003051584.1	112487966	NC_024319.1	-	3	1098	16319483	16323531	Antisense
XR_003051596.1	107989437	NC_024319.1	-	3	1245	5244947	5248138	Antisense
XR_003051629.1	112487983	NC_024319.1	-	4	570	14353990	14394351	Intergenic
XR_001761002.2	107989436	NC_024319.1	-	2	651	4114164	4114845	Antisense
XR_522483.3	103387991	NC_024319.1	-	4	1497	1581515	1585711	Antisense
XR_003051604.1	103388530	NC_024319.1	-	3	6249	10376042	10397655	Intergenic
XR_001760966.2	107988070	NC_024319.1	-	6	1771	15161308	15165903	Intergenic
XR_003051450.1	103387971	NC_024319.1	-	3	3651	1847084	1861196	Antisense
XR_003051505.1	112487934	NC_024319.1	-	9	1654	7316658	7326728	Antisense
XR_003051503.1	112487934	NC_024319.1	-	8	1547	7316660	7326728	Antisense
XR_522479.3	103387971	NC_024319.1	-	3	1624	1851774	1861196	Antisense
XR_003051543.1	112487951	NC_024319.1	-	4	498	2244622	2249016	Antisense
XR_003051456.1	107989416	NC_024319.1	-	4	1203	523594	526960	Intergenic
XR_003051559.1	112487958	NC_024319.1	-	4	522	13519314	13530028	Antisense
XR_003051608.1	103388530	NC_024319.1	-	4	5938	10376042	10397690	Intergenic
XR_003051467.1	112487915	NC_024319.1	-	4	1254	11566041	11648715	Antisense
XR_003051487.1	107988070	NC_024319.1	-	7	1604	15161309	15165939	Intergenic
XR_003051575.1	112487964	NC_024319.1	-	3	1075	21131249	21133675	Antisense
XR_003051588.1	112487969	NC_024319.1	-	4	682	11693967	11698886	Intergenic
XR_001760955.2	107988073	NC_024319.1	-	6	1518	1169314	1179643	Antisense
XR_003051451.1	112487907	NC_024319.1	-	2	1251	167599	168973	Intergenic
XR_001760967.2	107988070	NC_024319.1	-	7	1724	15161308	15165949	Intergenic
XR_003051515.1	112487935	NC_024319.1	-	2	718	6128897	6129714	Intergenic
XR_522506.3	103388321	NC_024319.1	-	3	1073	6290656	6292518	Intergenic
XR_003051628.1	112487983	NC_024319.1	-	4	593	14353990	14394351	Intergenic
XR_003051643.1	103388922	NC_024319.1	-	4	1241	19953364	19954921	Intergenic
XR_003051423.1	112487898	NC_024319.1	-	2	1145	7665771	7667015	Intergenic
XR_003051650.1	103388321	NC_024319.1	-	2	1001	6290656	6292203	Intergenic
XR_522469.3	103387879	NC_024319.1	-	5	2270	589807	671755	Intergenic
XR_003051475.1	112487921	NC_024319.1	-	3	1411	19290622	19294017	Antisense
XR_001760937.1	107989407	NC_024319.1	-	4	1348	3346433	3354489	Antisense
XR_003051645.1	112487989	NC_024319.1	-	5	1818	19456939	19467759	Intergenic
XR_522516.3	103388541	NC_024319.1	-	4	1334	10017940	10038621	Intergenic
XR_001761000.2	107989435	NC_024319.1	-	4	1259	17650796	17657848	Antisense
XR_001761001.2	107989435	NC_024319.1	-	4	653	17650796	17656856	Antisense
XR_003051585.1	112487967	NC_024319.1	-	3	333	9834247	9839110	Intergenic
XR_001761003.2	103388712	NC_024319.1	+	4	3210	15337722	15348847	Intergenic
XR_003051600.1	112487972	NC_024319.1	+	3	2017	18993934	19016611	Intergenic
XR_003051536.1	112487942	NC_024319.1	+	3	2226	11717307	11739874	Antisense
XR_003051499.1	112487931	NC_024319.1	+	2	1832	9665105	9667001	Antisense
XR_003051637.1	103388921	NC_024319.1	+	5	2422	19948596	19953740	Intergenic
XR_003051445.1	112487904	NC_024319.1	+	6	1279	498301	501527	Antisense
XR_003051642.1	103388921	NC_024319.1	+	5	1158	19948407	19953740	Intergenic
XR_003051454.1	112487910	NC_024319.1	+	2	1171	1885719	1887334	Intergenic
XR_003051465.1	112487913	NC_024319.1	+	2	569	5342340	5342941	Intergenic
XR_522555.3	103388962	NC_024319.1	+	3	435	20760239	20761065	Intergenic
XR_003051466.1	112487914	NC_024319.1	+	3	1663	5348071	5363157	Antisense
XR_003051653.1	112487994	NC_024319.1	+	2	211	21895259	21895529	Intergenic
XR_003051549.1	112487954	NC_024319.1	+	2	713	2298255	2299042	Intronic
XR_003051419.1	112487897	NC_024319.1	+	3	2139	18983142	18993838	Intergenic
XR_003051452.1	112487908	NC_024319.1	+	2	3140	427346	430722	Antisense
XR_003051613.1	112487979	NC_024319.1	+	3	2365	18728498	18734030	Antisense
XR_003051494.1	103388197	NC_024319.1	+	4	1065	4394797	4398817	Intergenic
XR_003051639.1	103388921	NC_024319.1	+	6	2485	19948588	19953740	Intergenic
XR_003051498.1	112487930	NC_024319.1	+	3	487	10760636	10766397	Intergenic
XR_003051432.1	112487901	NC_024319.1	+	2	5600	10315735	10321483	Antisense
XR_003051490.1	112487927	NC_024319.1	+	6	816	4347005	4365334	Antisense
XR_003051491.1	112487927	NC_024319.1	+	5	701	4361743	4365334	Antisense
XR_003051611.1	112487976	NC_024319.1	+	2	3033	16113903	16120702	Intronic
XR_001761014.2	107989440	NC_024319.1	+	3	1326	9104331	9109537	Antisense
XR_003051638.1	103388921	NC_024319.1	+	5	1854	19949998	19953740	Intergenic
XR_001760991.2	107989431	NC_024319.1	+	4	3495	15981693	16006278	Antisense
XR_003051431.1	112487900	NC_024319.1	+	2	1130	17213468	17214646	Intronic
XR_001760989.2	107989430	NC_024319.1	+	8	2020	3154716	3177899	Antisense
XR_003051554.1	112487957	NC_024319.1	+	3	1004	21113953	21121921	Intergenic
XR_003051552.1	112487956	NC_024319.1	+	2	1486	19718077	19723282	Intergenic
XR_003051641.1	103388921	NC_024319.1	+	5	1158	19948404	19953740	Intergenic
XR_522501.2	103388246	NC_024319.1	+	5	533	5011261	5062314	Antisense
XR_003051601.1	112487973	NC_024319.1	+	2	518	5882461	5883110	Intergenic
XR_003051542.1	112487950	NC_024319.1	+	2	1196	16332981	16334297	Intergenic
XR_003051574.1	112487963	NC_024319.1	+	2	1154	3339342	3340539	Antisense
XR_003051453.1	112487909	NC_024319.1	+	3	1534	1339969	1343188	Antisense
XR_001760934.2	103388303	NC_024319.1	+	5	790	6052697	6120981	Antisense
XR_522538.2	103388743	NC_024319.1	+	3	5723	15723083	15733296	Intergenic
XR_003051599.1	112487972	NC_024319.1	+	3	3114	18993934	19083078	Intergenic
XR_522552.3	103388921	NC_024319.1	+	5	1102	19949769	19953740	Intergenic
XR_003051630.1	112487984	NC_024319.1	+	2	1545	7216964	7218850	Intergenic
XR_001760943.2	107989411	NC_024319.1	+	4	1618	5063488	5072704	Antisense
XR_003051631.1	112487986	NC_024319.1	+	2	1725	8866464	8868505	Intergenic
XR_003051462.1	107989396	NC_024319.1	+	3	2112	11053143	11056094	Antisense
XR_003051648.1	107989399	NC_024319.1	+	5	1275	20204884	20215822	Intergenic
XR_003051647.1	107989399	NC_024319.1	+	4	1917	20204884	20215822	Intergenic
XR_003051447.1	112487905	NC_024319.1	+	2	704	284936	285754	Intergenic
XR_003051444.1	112487904	NC_024319.1	+	5	1401	498301	501527	Antisense
XR_003051477.1	112487923	NC_024319.1	+	2	1613	21856205	21875694	Antisense
XR_003051615.1	112487980	NC_024319.1	+	6	1205	19797252	19804136	Antisense
XR_003051537.1	112487943	NC_024319.1	+	3	3726	6114523	6118341	Intergenic
XR_001760917.2	107989401	NC_024319.1	+	3	4102	10960390	10965932	Intergenic
XR_003051546.1	112487952	NC_024319.1	+	3	1127	8327292	8339500	Antisense
XR_003051565.1	112487962	NC_024319.1	+	4	1052	17097127	17100830	Antisense
XR_003051468.1	112487916	NC_024319.1	+	2	746	20866269	20867078	Antisense
XR_003051495.1	112487929	NC_024319.1	+	3	2646	5546010	5549095	Antisense
XR_001760948.2	107989413	NC_024319.1	+	2	960	3392881	3393937	Antisense
XR_001760992.2	107989431	NC_024319.1	+	3	3227	15981700	16006278	Antisense
XR_003051640.1	103388921	NC_024319.1	+	6	2490	19948586	19953740	Intergenic
XR_522537.3	103388712	NC_024319.1	+	4	2519	15334676	15348847	Intergenic
XR_522495.3	103388212	NC_024319.1	+	4	1008	4805250	4808928	Antisense
XR_003051519.1	112487938	NC_024319.1	+	2	1253	3674048	3677410	Antisense
XR_001760912.2	103388921	NC_024319.1	+	5	1270	19949745	19953740	Intergenic
XR_522509.3	103388388	NC_024319.1	+	4	2120	8365298	8370957	Antisense
XR_003051651.1	112487993	NC_024319.1	+	4	1935	21437743	21451238	Intergenic
XR_003051635.1	103388921	NC_024319.1	+	5	2730	19948577	19953750	Intergenic
XR_003051520.1	107989431	NC_024319.1	+	3	2725	15981699	16002986	Intergenic
XR_003051598.1	112487972	NC_024319.1	+	4	2030	18993934	19085736	Intergenic
XR_003051636.1	103388921	NC_024319.1	+	5	1851	19949998	19953740	Intergenic
XR_003051492.1	112487927	NC_024319.1	+	5	660	4347033	4365334	Antisense
XR_003051597.1	112487972	NC_024319.1	+	3	2074	18993934	19016611	Intergenic
XR_003051430.1	112487899	NC_024319.1	+	3	1779	20721451	20736720	Antisense
XR_522510.3	103388395	NC_024319.1	+	3	613	8578040	8579183	Intergenic
XR_003051506.1	107989391	NC_024319.1	+	2	1559	7220525	7222180	Intergenic
XR_003051534.1	112487941	NC_024319.1	+	2	16571	14570475	14590233	Intergenic
XR_003051418.1	112487896	NC_024319.1	+	3	686	14235066	14236992	Intergenic
XR_001760916.2	107989400	NC_024319.1	+	3	1080	16599677	16602145	Intergenic
XR_523599.2	103399178	NW_007586058.1	-	2	943	1	1022	Intergenic
XR_523684.3	103399698	NW_007593376.1	+	3	215	35	480	Intergenic
XR_003049182.1	112486696	NW_007591527.1	+	2	292	17	403	Intergenic
XR_003049154.1	112486645	NW_007586882.1	+	3	372	21	918	Intergenic
XR_523660.3	103399609	NW_007591117.1	-	3	334	46	549	Intergenic
XR_523690.2	103399720	NW_007594362.1	-	3	267	8	477	Intergenic
XR_003049118.1	103398998	NW_007585260.1	+	2	1309	500	2160	Intergenic
XR_003049117.1	103398998	NW_007585260.1	+	2	1574	488	2160	Intergenic
XR_523521.3	103398616	NW_007585117.1	-	3	4681	302667	307717	Intronic
XR_003049027.1	112486555	NW_007585117.1	+	3	684	210877	212930	Antisense
XR_003049028.1	112486556	NW_007585117.1	+	3	705	213522	215620	Intergenic
XR_523601.3	103399201	NW_007586274.1	-	3	332	1	1080	Intergenic
XR_523707.2	103399781	NW_007597856.1	+	3	204	1	384	Intergenic
XR_003049088.1	112486583	NW_007585144.1	+	3	490	809	1502	Intergenic
XR_003049167.1	112486662	NW_007588661.1	+	2	349	272	702	Intergenic
XR_003049410.1	103377317	NC_024309.1	-	12	1349	11670248	11687356	Antisense
XR_003049350.1	103377412	NC_024309.1	-	9	2179	13483382	13512991	Intergenic
XR_521407.3	103377388	NC_024309.1	-	4	1707	12776226	12784823	Intergenic
XR_003049401.1	103377297	NC_024309.1	-	4	1671	11105838	11112547	Antisense
XR_003049389.1	112486843	NC_024309.1	-	2	1197	12613308	12616471	Intergenic
XR_003049414.1	103377034	NC_024309.1	-	7	917	5962203	6024895	Intergenic
XR_003049342.1	112486823	NC_024309.1	-	4	3974	5819754	5827294	Intergenic
XR_003049349.1	112486825	NC_024309.1	-	3	411	5356272	5358107	Antisense
XR_003049377.1	103376950	NC_024309.1	-	4	947	3892316	3903930	Antisense
XR_003049426.1	112486867	NC_024309.1	-	3	450	3104911	3109616	Antisense
XR_003049313.1	103376887	NC_024309.1	-	7	1741	2178779	2193887	Antisense
XR_003049348.1	107988396	NC_024309.1	-	4	3123	3336216	3342820	Intergenic
XR_003049402.1	103377297	NC_024309.1	-	5	966	11105788	11112547	Antisense
XR_003049352.1	103377412	NC_024309.1	-	9	3557	13481986	13512226	Intergenic
XR_521414.3	103377445	NC_024309.1	-	3	352	14861696	14870375	Antisense
XR_001759870.2	107988367	NC_024309.1	-	9	1108	13513570	13571656	Intergenic
XR_003049421.1	112486861	NC_024309.1	-	3	1299	4175017	4201449	Intergenic
XR_001759868.2	107988367	NC_024309.1	-	9	1112	13513570	13571656	Intergenic
XR_003049432.1	112486873	NC_024309.1	-	4	2324	12871013	12894935	Antisense
XR_003049391.1	107988394	NC_024309.1	-	3	795	12767549	12773748	Antisense
XR_003049345.1	107988396	NC_024309.1	-	4	3097	3336216	3342820	Intergenic
XR_003049434.1	112486873	NC_024309.1	-	4	664	12888157	12894935	Antisense
XR_001759920.2	107988394	NC_024309.1	-	4	648	12767549	12773748	Antisense
XR_521396.3	103377317	NC_024309.1	-	11	1523	11670248	11687257	Antisense
XR_003049347.1	107988396	NC_024309.1	-	3	2191	3336216	3342820	Intergenic
XR_003049423.1	112486863	NC_024309.1	-	3	4678	3625360	3660927	Intergenic
XR_003049360.1	112486827	NC_024309.1	-	2	4009	9744732	9748778	Intronic
XR_003049438.1	112486882	NC_024309.1	-	4	3492	3931534	3942862	Intergenic
XR_003049412.1	103377333	NC_024309.1	-	4	754	11503464	11508295	Antisense
XR_003049458.1	112486892	NC_024309.1	-	2	511	13854722	13855329	Intergenic
XR_003049340.1	103377153	NC_024309.1	-	5	1485	9397090	9516434	Antisense
XR_003049427.1	112486868	NC_024309.1	-	3	2862	3114961	3129392	Antisense
XR_003049351.1	103377412	NC_024309.1	-	9	2026	13483382	13513511	Intergenic
XR_003049437.1	112486874	NC_024309.1	-	3	690	13182650	13185293	Intergenic
XR_521398.3	103377333	NC_024309.1	-	3	997	11503464	11508295	Antisense
XR_003049362.1	112486829	NC_024309.1	-	2	1308	15990643	15992008	Intergenic
XR_003049384.1	112486839	NC_024309.1	-	2	2600	15232870	15235541	Intergenic
XR_003049413.1	112486852	NC_024309.1	-	2	2292	11579982	11582504	Intronic
XR_003049355.1	103377412	NC_024309.1	-	9	1795	13483382	13513571	Intergenic
XR_003049341.1	112486823	NC_024309.1	-	4	4036	5819754	5827294	Intergenic
XR_003049460.1	103377451	NC_024309.1	-	3	371	14840377	14841252	Intergenic
XR_003049429.1	112486871	NC_024309.1	-	3	709	13810387	13811837	Intergenic
XR_003049379.1	103376950	NC_024309.1	-	5	4552	3868695	3903930	Antisense
XR_003049361.1	112486828	NC_024309.1	-	3	764	15995834	15997389	Intergenic
XR_521349.3	103376887	NC_024309.1	-	7	1693	2178779	2193887	Antisense
XR_521410.3	103377412	NC_024309.1	-	9	2382	13483382	13512220	Intergenic
XR_521351.3	103376950	NC_024309.1	-	5	2674	3859265	3903930	Antisense
XR_003049344.1	107988396	NC_024309.1	-	3	3249	3336216	3342820	Intergenic
XR_003049308.1	103377511	NC_024309.1	-	3	1468	15916936	15920732	Antisense
XR_003049354.1	103377412	NC_024309.1	-	9	1984	13483382	13513511	Intergenic
XR_003049385.1	112486840	NC_024309.1	-	3	593	13057874	13059320	Intergenic
XR_003049357.1	107988367	NC_024309.1	-	8	1259	13513570	13570803	Intergenic
XR_001759917.2	107988392	NC_024309.1	-	5	1329	12607710	12611160	Intergenic
XR_003049436.1	112486874	NC_024309.1	-	3	660	13182650	13187484	Intergenic
XR_003049420.1	112486860	NC_024309.1	-	2	2800	11928112	11935857	Intergenic
XR_003049315.1	112486822	NC_024309.1	-	2	877	13386577	13387690	Antisense
XR_003049433.1	112486873	NC_024309.1	-	4	812	12887046	12894935	Antisense
XR_003049416.1	112486855	NC_024309.1	-	2	3616	10190203	10193910	Intronic
XR_521355.3	103377034	NC_024309.1	-	6	1928	6019508	6024888	Intergenic
XR_003049411.1	103377333	NC_024309.1	-	4	850	11503464	11508295	Antisense
XR_003049390.1	112486844	NC_024309.1	-	2	960	3597936	3599846	Antisense
XR_003049415.1	112486854	NC_024309.1	-	4	324	13098553	13115841	Intergenic
XR_003049378.1	103376950	NC_024309.1	-	5	2871	3859265	3903930	Antisense
XR_003049450.1	112486889	NC_024309.1	-	4	1018	14687194	14693136	Antisense
XR_003049383.1	112486839	NC_024309.1	-	3	2840	15232556	15235541	Intergenic
XR_003049346.1	107988396	NC_024309.1	-	4	2256	3336216	3342820	Intergenic
XR_001759877.2	107988370	NC_024309.1	-	5	731	4203627	4226241	Intergenic
XR_001759930.2	107988399	NC_024309.1	-	3	562	3919751	3920708	Intergenic
XR_003049356.1	103377412	NC_024309.1	-	9	2395	13483382	13512220	Intergenic
XR_003049447.1	112486888	NC_024309.1	-	4	936	14693323	14697706	Antisense
XR_003049449.1	112486889	NC_024309.1	-	3	642	14687954	14693136	Antisense
XR_521393.3	103377297	NC_024309.1	-	5	1604	11105838	11112553	Antisense
XR_003049448.1	112486889	NC_024309.1	-	3	639	14687954	14693136	Antisense
XR_003049353.1	103377412	NC_024309.1	-	10	2160	13483382	13513512	Intergenic
XR_003049367.1	112486831	NC_024309.1	+	3	1416	15652352	15655948	Antisense
XR_003049369.1	112486831	NC_024309.1	+	5	1080	15652352	15659434	Antisense
XR_003049430.1	112486872	NC_024309.1	+	3	2535	12919127	12922936	Antisense
XR_003049375.1	112486836	NC_024309.1	+	3	1342	12070110	12072468	Intergenic
XR_001759916.2	107988391	NC_024309.1	+	2	800	12089916	12091261	Intergenic
XR_003049428.1	112486870	NC_024309.1	+	2	7198	2865036	2872269	Intronic
XR_003049370.1	112486832	NC_024309.1	+	5	627	15659734	15683339	Antisense
XR_521425.3	103377525	NC_024309.1	+	3	739	15684429	15686963	Intergenic
XR_001759902.2	107988384	NC_024309.1	+	4	481	10386412	10406055	Antisense
XR_003049409.1	112486851	NC_024309.1	+	2	1093	11672459	11673613	Intergenic
XR_003049386.1	112486842	NC_024309.1	+	3	350	10161226	10163811	Antisense
XR_003049365.1	112486830	NC_024309.1	+	3	643	14709261	14714155	Intergenic
XR_003049440.1	112486883	NC_024309.1	+	3	1831	555127	558919	Intergenic
XR_003049368.1	112486831	NC_024309.1	+	4	1507	15652352	15658980	Antisense
XR_003049453.1	112486890	NC_024309.1	+	7	1374	14499979	14582667	Intergenic
XR_003049376.1	112486836	NC_024309.1	+	3	1403	12070110	12072468	Intergenic
XR_003049422.1	112486862	NC_024309.1	+	3	768	65375	68333	Intergenic
XR_003049459.1	112486893	NC_024309.1	+	2	1774	3677804	3680851	Intergenic
XR_001759905.2	107988386	NC_024309.1	+	3	500	13120159	13123207	Antisense
XR_521418.3	103377493	NC_024309.1	+	3	1674	16069307	16082468	Antisense
XR_001759872.2	107988368	NC_024309.1	+	4	1128	2893453	2919931	Intergenic
XR_003049442.1	112486884	NC_024309.1	+	2	283	7933903	7934241	Intergenic
XR_003049424.1	112486864	NC_024309.1	+	4	2989	1015176	1022176	Intergenic
XR_003049343.1	112486824	NC_024309.1	+	2	750	5835315	5837039	Antisense
XR_003049406.1	112486849	NC_024309.1	+	4	663	10040191	10042709	Antisense
XR_003049400.1	103377272	NC_024309.1	+	5	1668	11058112	11072667	Intergenic
XR_003049418.1	112486858	NC_024309.1	+	4	995	9071679	9101388	Intergenic
XR_003049310.1	112486819	NC_024309.1	+	5	4295	5491364	5510124	Intergenic
XR_003049419.1	112486859	NC_024309.1	+	6	908	8909446	8912127	Antisense
XR_003049455.1	112486891	NC_024309.1	+	3	1916	14212213	14227022	Antisense
XR_003049358.1	112486826	NC_024309.1	+	2	2751	13484195	13487005	Intergenic
XR_001759871.2	107988368	NC_024309.1	+	3	1031	2893453	2919931	Intergenic
XR_003049454.1	112486890	NC_024309.1	+	5	2220	14495347	14532718	Intergenic
XR_003049445.1	112486886	NC_024309.1	+	7	2293	7681742	7703085	Intergenic
XR_521367.3	103377110	NC_024309.1	+	3	361	8620717	8622703	Intergenic
XR_001759914.2	103377121	NC_024309.1	+	6	695	8931969	8934798	Intronic
XR_521378.3	103377195	NC_024309.1	+	3	455	10074347	10075048	Antisense
XR_003049444.1	112486886	NC_024309.1	+	6	652	7683908	7703085	Intergenic
XR_003049373.1	112486835	NC_024309.1	+	3	760	406076	410396	Antisense
XR_003049451.1	112486890	NC_024309.1	+	7	1396	14495347	14582667	Intergenic
XR_003049457.1	112486891	NC_024309.1	+	3	1905	14212213	14227022	Antisense
XR_521356.3	103377047	NC_024309.1	+	3	559	6899815	6900948	Intergenic
XR_003049431.1	112486872	NC_024309.1	+	3	2482	12919127	12922936	Antisense
XR_521382.3	103377227	NC_024309.1	+	4	1078	10429485	10440037	Antisense
XR_521381.3	103377227	NC_024309.1	+	5	1148	10425736	10440037	Antisense
XR_003049452.1	112486890	NC_024309.1	+	7	1409	14495347	14582667	Intergenic
XR_003049301.1	112486816	NC_024309.1	+	3	677	16242446	16244225	Intergenic
XR_001759879.2	107988371	NC_024309.1	+	3	3209	8209364	8213166	Intergenic
XR_003049446.1	112486887	NC_024309.1	+	2	835	10601591	10602561	Intergenic
XR_003049456.1	112486891	NC_024309.1	+	4	992	14212213	14246632	Antisense
XR_003049300.1	112486815	NC_024309.1	+	3	687	16240553	16241727	Intergenic
XR_003049403.1	112486847	NC_024309.1	+	2	848	11187541	11188447	Antisense
XR_001759878.2	107988371	NC_024309.1	+	3	2770	8209375	8213589	Intergenic
XR_521408.3	103377395	NC_024309.1	+	5	435	12687765	12689185	Intergenic
XR_003049443.1	112486885	NC_024309.1	+	3	441	7318051	7319570	Intergenic
XR_523578.3	103399042	NW_007585362.1	-	3	2754	7	3231	Intergenic
XR_523677.3	103399668	NW_007592552.1	+	2	294	43	535	Intergenic
XR_523657.2	103399593	NW_007590839.1	-	3	266	97	548	Intergenic
XR_003049169.1	112486669	NW_007589151.1	-	2	348	280	704	Intergenic
XR_001759790.2	107988127	NW_007585121.1	-	4	1278	2824	18689	Antisense
XR_003049047.1	107988127	NW_007585121.1	-	4	776	7109	18689	Antisense
XR_003049049.1	112486557	NW_007585121.1	+	2	2902	102541	105811	Intergenic
XR_003049050.1	112486557	NW_007585121.1	+	2	2967	102541	105811	Intergenic
XR_003048908.1	112486467	NC_024328.1	-	4	910	21304551	21309004	Intergenic
XR_001761781.2	107990228	NC_024328.1	-	3	1629	10732652	10736306	Intergenic
XR_523440.2	103397330	NC_024328.1	-	3	334	445873	446460	Intronic
XR_003048911.1	103398168	NC_024328.1	-	7	1029	16551162	16554873	Intronic
XR_003048918.1	112486471	NC_024328.1	-	5	1326	17931711	17943898	Intergenic
XR_003048922.1	112486471	NC_024328.1	-	5	1312	17931711	17943898	Intergenic
XR_003048971.1	112486516	NC_024328.1	-	2	1481	14288001	14290700	Intergenic
XR_003048957.1	112486496	NC_024328.1	-	2	5428	11595580	11606349	Intergenic
XR_003048973.1	112486518	NC_024328.1	-	3	1104	9937941	9939461	Intergenic
XR_003048931.1	112486477	NC_024328.1	-	3	1599	21375218	21377813	Intronic
XR_003048920.1	112486471	NC_024328.1	-	4	1258	17931711	17943898	Intergenic
XR_003048916.1	112486471	NC_024328.1	-	6	1370	17931711	17943898	Intergenic
XR_003048966.1	112486510	NC_024328.1	-	4	589	16239853	16240820	Intergenic
XR_003048942.1	112486486	NC_024328.1	-	2	233	17488409	17492763	Intergenic
XR_001761799.2	107990251	NC_024328.1	-	3	1835	16165017	16168098	Intergenic
XR_523483.3	103398214	NC_024328.1	-	4	3652	18188681	18196577	Intergenic
XR_003048941.1	112486485	NC_024328.1	-	3	814	17514598	17521366	Intergenic
XR_523480.3	103398168	NC_024328.1	-	7	1034	16551161	16554873	Intronic
XR_003048904.1	112486465	NC_024328.1	-	2	2182	2136375	2138630	Antisense
XR_003048926.1	112486472	NC_024328.1	-	2	2648	8737116	8744004	Antisense
XR_001761802.1	107990254	NC_024328.1	-	3	310	13832625	13833756	Intergenic
XR_003048923.1	112486471	NC_024328.1	-	4	1263	17931711	17943898	Intergenic
XR_003048910.1	103398214	NC_024328.1	-	5	6480	18185007	18196577	Intergenic
XR_003048938.1	112486484	NC_024328.1	-	2	1329	2490974	2492880	Intronic
XR_523451.3	103397503	NC_024328.1	-	4	4515	3386139	3426415	Intergenic
XR_003048924.1	112486471	NC_024328.1	-	5	1307	17931711	17943898	Intergenic
XR_003048917.1	112486471	NC_024328.1	-	6	1375	17931711	17943898	Intergenic
XR_523467.3	103397794	NC_024328.1	-	3	1073	8730643	8734419	Antisense
XR_003048970.1	107990258	NC_024328.1	-	4	2561	10673069	10684056	Intergenic
XR_003048928.1	112486474	NC_024328.1	-	3	1365	3112564	3117599	Intronic
XR_003048975.1	103398219	NC_024328.1	-	3	1142	17836027	17839155	Intergenic
XR_003048919.1	112486471	NC_024328.1	-	6	1309	17931711	17943898	Intergenic
XR_003048909.1	112486468	NC_024328.1	-	2	938	2062446	2063489	Intergenic
XR_003048879.1	112486452	NC_024328.1	-	3	933	5202012	5203471	Intergenic
XR_523472.3	103397901	NC_024328.1	-	3	786	12494828	12497121	Antisense
XR_001761780.2	107990227	NC_024328.1	-	2	1051	19256528	19261503	Intergenic
XR_003048921.1	112486471	NC_024328.1	-	5	1321	17931711	17943898	Intergenic
XR_003048912.1	112486469	NC_024328.1	-	2	732	16543736	16544593	Intronic
XR_003048947.1	112486490	NC_024328.1	-	5	586	13553529	13554866	Antisense
XR_003048958.1	112486498	NC_024328.1	-	3	1560	21344868	21347308	Intergenic
XR_003048969.1	107990258	NC_024328.1	-	4	2543	10673070	10684055	Intergenic
XR_001761801.2	107990253	NC_024328.1	-	2	489	705139	705763	Intergenic
XR_523439.3	103397321	NC_024328.1	-	3	1338	379652	381191	Intergenic
XR_523473.3	103397901	NC_024328.1	-	3	806	12494803	12497121	Antisense
XR_003048883.1	112486455	NC_024328.1	+	5	1128	9989355	9993267	Antisense
XR_001761800.1	107990252	NC_024328.1	+	3	442	9259235	9259909	Intronic
XR_001761821.2	107990271	NC_024328.1	+	3	496	15494878	15506310	Intergenic
XR_523469.3	103397873	NC_024328.1	+	5	2024	10356354	10361351	Intergenic
XR_001761810.2	107990261	NC_024328.1	+	3	756	10486806	10490249	Antisense
XR_523474.3	103397949	NC_024328.1	+	3	927	13625568	13630986	Intergenic
XR_001761803.2	107990255	NC_024328.1	+	2	770	11124079	11125403	Intergenic
XR_003048884.1	112486455	NC_024328.1	+	6	1653	9984164	9993267	Antisense
XR_003048903.1	112486463	NC_024328.1	+	3	375	20629621	20630944	Antisense
XR_003048902.1	112486462	NC_024328.1	+	2	265	20608068	20626541	Antisense
XR_003048900.1	112486461	NC_024328.1	+	3	834	17075257	17087329	Intergenic
XR_001761806.2	107990259	NC_024328.1	+	3	640	4065273	4066114	Intergenic
XR_001761804.2	107990256	NC_024328.1	+	3	1518	5890788	5892515	Intergenic
XR_003048968.1	112486513	NC_024328.1	+	2	2257	19151894	19154319	Intergenic
XR_001761798.2	107990249	NC_024328.1	+	2	1691	12951279	12953108	Intergenic
XR_003048929.1	112486475	NC_024328.1	+	2	346	14551511	14552052	Antisense
XR_003048886.1	112486456	NC_024328.1	+	3	531	2027133	2028210	Intergenic
XR_003048885.1	112486456	NC_024328.1	+	3	528	2027133	2028210	Intergenic
XR_523443.3	103397352	NC_024328.1	+	3	2459	669422	675764	Intergenic
XR_003048889.1	112486457	NC_024328.1	+	2	954	2249068	2250357	Intronic
XR_003048936.1	112486482	NC_024328.1	+	3	1221	7885792	7890941	Intergenic
XR_003048901.1	112486462	NC_024328.1	+	2	1432	20613758	20626541	Antisense
XR_003048933.1	112486478	NC_024328.1	+	2	714	14756478	14757289	Intergenic
XR_003048951.1	112486492	NC_024328.1	+	2	614	12613030	12616018	Intergenic
XR_001761813.2	107990267	NC_024328.1	+	3	429	3873182	3874128	Antisense
XR_003048967.1	112486512	NC_024328.1	+	3	438	7151322	7153400	Antisense
XR_001759771.2	107988082	NC_024328.1	+	2	582	21700394	21701262	Intergenic
XR_003048944.1	112486487	NC_024328.1	+	2	507	3720825	3721416	Intergenic
XR_001759834.2	107988208	NW_007588165.1	+	4	431	1	780	Intergenic
XR_003049180.1	112486694	NW_007591384.1	+	2	439	23	584	Intergenic
XR_523650.2	103399554	NW_007590126.1	-	3	303	45	534	Intergenic
XR_523590.3	103399144	NW_007585838.1	-	3	515	1	1083	Intergenic
XR_523681.3	103399678	NW_007592823.1	+	3	328	7	526	Intergenic
XR_523582.3	103399093	NW_007585566.1	-	3	465	33	1174	Intergenic
XR_523602.3	103399206	NW_007586319.1	+	3	254	271	1079	Intergenic
XR_003049159.1	112486651	NW_007587365.1	+	2	614	51	740	Intergenic
XR_003049026.1	112486552	NW_007585116.1	+	2	310	1224	1780	Intergenic
XR_523520.2	103398591	NW_007585116.1	+	7	1223	367534	386377	Intergenic
XR_523616.2	103399291	NW_007587020.1	+	2	321	116	514	Intergenic
XR_003049199.1	112486723	NW_007594374.1	-	2	389	1	479	Intergenic
XR_523558.3	103398964	NW_007585211.1	+	4	741	71	3301	Intergenic
XR_003051792.1	112488074	NC_024320.1	-	2	1627	12620328	12622563	Intergenic
XR_003051809.1	112488083	NC_024320.1	-	7	1061	8173151	8180471	Antisense
XR_003051727.1	112488046	NC_024320.1	-	3	1796	13509154	13741370	Antisense
XR_001761041.2	107989486	NC_024320.1	-	3	1531	20533799	20545076	Sense
XR_003051852.1	112488111	NC_024320.1	-	3	508	24027013	24064832	Intergenic
XR_522618.3	103389564	NC_024320.1	-	3	864	10716585	10719282	Intergenic
XR_001761024.2	107989474	NC_024320.1	-	4	434	24375420	24378468	Antisense
XR_001761019.2	107989471	NC_024320.1	-	2	2679	11905579	11909264	Intergenic
XR_522588.3	103389301	NC_024320.1	-	4	2501	4938293	4951366	Intergenic
XR_522648.3	103390054	NC_024320.1	-	2	577	20157817	20173917	Antisense
XR_522596.3	103389394	NC_024320.1	-	5	3630	6580169	6590411	Intergenic
XR_001761091.2	107989507	NC_024320.1	-	3	2473	14706824	14719787	Intergenic
XR_003051737.1	112488049	NC_024320.1	-	2	829	10075195	10080533	Antisense
XR_003051838.1	107989474	NC_024320.1	-	3	405	24375420	24376180	Antisense
XR_001761050.2	107989492	NC_024320.1	-	3	400	21549073	21582225	Intergenic
XR_522610.3	103389487	NC_024320.1	-	3	2099	9011349	9023270	Intergenic
XR_522599.3	103389398	NC_024320.1	-	9	2651	6516951	6537859	Intergenic
XR_003051801.1	107989485	NC_024320.1	-	3	5618	21003546	21009303	Intronic
XR_003051765.1	112488059	NC_024320.1	-	3	665	15990388	15996968	Antisense
XR_003051688.1	112488028	NC_024320.1	-	3	1058	9735895	9739105	Antisense
XR_522666.3	103390223	NC_024320.1	-	3	1263	24380008	24382238	Intergenic
XR_001761027.2	107989475	NC_024320.1	-	4	1479	5064791	5078522	Antisense
XR_003051805.1	103390189	NC_024320.1	-	5	1324	23324195	23357591	Intergenic
XR_003051796.1	112488078	NC_024320.1	-	2	572	10230837	10231940	Intergenic
XR_001761025.2	107989474	NC_024320.1	-	4	401	24375420	24378468	Antisense
XR_522572.3	103389141	NC_024320.1	-	3	1117	3176799	3196443	Intergenic
XR_522653.3	103390107	NC_024320.1	-	4	770	21337398	21370631	Intergenic
XR_003051696.1	112488032	NC_024320.1	-	3	622	6136180	6137833	Intergenic
XR_003051790.1	112488072	NC_024320.1	-	2	2217	9911892	9922068	Intergenic
XR_003051808.1	112488083	NC_024320.1	-	10	1986	8161684	8180471	Antisense
XR_003051766.1	112488060	NC_024320.1	-	2	978	16522103	16523174	Intergenic
XR_003051743.1	112488052	NC_024320.1	-	3	3018	24181815	24185793	Intronic
XR_522604.3	103389449	NC_024320.1	-	3	585	8181442	8190171	Antisense
XR_003051728.1	112488046	NC_024320.1	-	4	711	13508623	13741370	Antisense
XR_003051804.1	103390189	NC_024320.1	-	6	585	23247080	23357591	Sense
XR_522661.3	103390189	NC_024320.1	-	4	1411	23313147	23357591	Intergenic
XR_003051718.1	107989523	NC_024320.1	-	2	2022	22119410	22121579	Antisense
XR_003051689.1	112488028	NC_024320.1	-	3	1054	9735895	9739104	Antisense
XR_001761138.2	107989527	NC_024320.1	-	2	1366	11651041	11652436	Antisense
XR_003051807.1	112488083	NC_024320.1	-	10	1995	8161684	8180471	Antisense
XR_003051724.1	112488044	NC_024320.1	-	2	1152	26380451	26381644	Intergenic
XR_003051700.1	103389398	NC_024320.1	-	7	1594	6516951	6531174	Intergenic
XR_522605.3	103389449	NC_024320.1	-	3	583	8180481	8190164	Antisense
XR_001761124.2	107989520	NC_024320.1	-	3	1072	14457553	14466406	Intronic
XR_003051826.1	112488093	NC_024320.1	-	2	724	6007706	6010975	Antisense
XR_001761036.2	107989484	NC_024320.1	-	3	3394	1691048	1713733	Antisense
XR_003051810.1	112488084	NC_024320.1	-	2	1454	25793551	25795957	Antisense
XR_003051672.1	112488014	NC_024320.1	-	2	969	2554755	2555759	Intergenic
XR_003051837.1	112488099	NC_024320.1	-	3	1953	7019234	7022199	Antisense
XR_003051806.1	112488082	NC_024320.1	-	3	327	22173147	22311444	Intergenic
XR_003051795.1	112488077	NC_024320.1	-	2	1613	10234933	10236878	Antisense
XR_001761026.2	107989475	NC_024320.1	-	3	1490	5064791	5078554	Antisense
XR_003051834.1	112488096	NC_024320.1	-	2	1543	3455864	3457504	Antisense
XR_003051771.1	112488063	NC_024320.1	-	2	3093	17272676	17278999	Antisense
XR_001761126.2	107989521	NC_024320.1	-	2	1015	26408288	26409366	Intergenic
XR_003051770.1	112488062	NC_024320.1	-	3	714	16160459	16163699	Antisense
XR_522681.3	103390346	NC_024320.1	-	5	452	26958510	26959615	Intergenic
XR_003051677.1	112488016	NC_024320.1	-	2	3712	18432525	18436283	Antisense
XR_003051803.1	103390189	NC_024320.1	-	5	1516	23313147	23357591	Intergenic
XR_003051833.1	107989475	NC_024320.1	-	4	4477	5064791	5078535	Antisense
XR_003051726.1	112488045	NC_024320.1	-	4	1253	15080888	15082854	Intergenic
XR_003051827.1	112488094	NC_024320.1	-	3	1962	9710424	9715394	Antisense
XR_003051784.1	112488070	NC_024320.1	-	3	2383	15188524	15191725	Antisense
XR_003051694.1	112488030	NC_024320.1	-	2	1480	25527817	25529362	Antisense
XR_003051781.1	112488069	NC_024320.1	-	2	721	26031375	26032167	Intronic
XR_001761125.2	103390294	NC_024320.1	-	3	516	26410644	26412530	Intergenic
XR_003051768.1	107989483	NC_024320.1	+	2	1534	16374778	16376692	Intergenic
XR_003051678.1	112488017	NC_024320.1	+	2	1301	4611691	4613199	Intergenic
XR_003051695.1	112488031	NC_024320.1	+	3	711	11272104	11273619	Antisense
XR_003051735.1	103389524	NC_024320.1	+	6	3966	10060398	10067852	Intergenic
XR_001761032.2	107989483	NC_024320.1	+	3	1377	16374778	16376692	Intergenic
XR_003051763.1	107989481	NC_024320.1	+	9	3319	16324472	16354261	Antisense
XR_003051676.1	107989511	NC_024320.1	+	3	923	13032371	13039343	Intergenic
XR_522601.3	103389438	NC_024320.1	+	3	1010	8324530	8327934	Intergenic
XR_003051844.1	112488104	NC_024320.1	+	2	3190	734282	737544	Intronic
XR_003051846.1	103389993	NC_024320.1	+	3	981	18685705	18712706	Intergenic
XR_003051850.1	112488109	NC_024320.1	+	3	560	14639879	14641946	Antisense
XR_003051788.1	112488071	NC_024320.1	+	3	1432	13133857	13137247	Intergenic
XR_003051671.1	112488013	NC_024320.1	+	2	270	19083930	19084240	Intergenic
XR_003051787.1	112488071	NC_024320.1	+	3	1350	13133857	13137247	Intergenic
XR_003051840.1	112488100	NC_024320.1	+	3	1238	1905879	1911243	Intergenic
XR_003051717.1	107989495	NC_024320.1	+	3	2598	19352435	19399899	Intergenic
XR_003051668.1	112488009	NC_024320.1	+	2	260	22474831	22475129	Intronic
XR_003051839.1	103390373	NC_024320.1	+	3	254	27201691	27248058	Intergenic
XR_003051665.1	107989493	NC_024320.1	+	8	1885	27579542	27587442	Antisense
XR_001761030.2	107989481	NC_024320.1	+	10	2427	16324472	16354261	Antisense
XR_001761099.2	107989509	NC_024320.1	+	2	477	14642499	14643219	Intronic
XR_003051675.1	107989511	NC_024320.1	+	3	1492	13032371	13038116	Intergenic
XR_003051829.1	103389274	NC_024320.1	+	5	1203	5453270	5459490	Intergenic
XR_001761047.1	107989489	NC_024320.1	+	3	835	26177229	26178235	Intergenic
XR_522657.3	103390169	NC_024320.1	+	4	732	22544674	22549525	Antisense
XR_522594.2	103389383	NC_024320.1	+	2	2167	6312346	6314678	Intergenic
XR_001761034.2	103389064	NC_024320.1	+	6	1885	1483281	1498805	Antisense
XR_522667.3	103390242	NC_024320.1	+	3	1057	24561905	24573362	Intergenic
XR_003051769.1	107989483	NC_024320.1	+	3	818	16375323	16376692	Intergenic
XR_003051789.1	112488071	NC_024320.1	+	3	1445	13133857	13137247	Intergenic
XR_003051674.1	107989511	NC_024320.1	+	3	994	13032371	13045363	Intergenic
XR_003051698.1	112488033	NC_024320.1	+	2	1073	5626298	5628206	Antisense
XR_003051762.1	107989481	NC_024320.1	+	9	4127	16324472	16351591	Antisense
XR_003051854.1	103389555	NC_024320.1	+	5	840	11109691	11117883	Intergenic
XR_001761035.2	103389064	NC_024320.1	+	6	1832	1483282	1498805	Antisense
XR_003051767.1	112488061	NC_024320.1	+	3	1528	16307637	16312004	Intergenic
XR_003051776.1	103390065	NC_024320.1	+	4	1996	19942849	19947541	Antisense
XR_003051817.1	112488089	NC_024320.1	+	3	3011	17951320	17962114	Intergenic
XR_003051667.1	112488008	NC_024320.1	+	2	451	27538094	27539169	Antisense
XR_003051816.1	112488088	NC_024320.1	+	2	431	24508564	24509035	Antisense
XR_003051851.1	112488110	NC_024320.1	+	4	1464	20459884	20467514	Intergenic
XR_003051815.1	112488087	NC_024320.1	+	4	4128	17568744	17598641	Intergenic
XR_003051824.1	112488091	NC_024320.1	+	5	753	22997416	22998886	Antisense
XR_003051764.1	112488058	NC_024320.1	+	3	769	15841554	15852757	Intergenic
XR_003051712.1	103389561	NC_024320.1	+	3	2936	10732636	10744965	Antisense
XR_003051802.1	112488081	NC_024320.1	+	2	348	20914779	20915464	Intronic
XR_001761064.2	107989501	NC_024320.1	+	4	4366	12566429	12572130	Intergenic
XR_003051811.1	112488085	NC_024320.1	+	5	1855	10015768	10019845	Intergenic
XR_001761051.2	107989493	NC_024320.1	+	8	1896	27579542	27587442	Antisense
XR_003051853.1	112488112	NC_024320.1	+	3	10642	14354138	14371936	Antisense
XR_003051791.1	112488073	NC_024320.1	+	3	337	28787348	28788343	Intronic
XR_522642.3	103389992	NC_024320.1	+	2	2306	18657192	18659569	Intergenic
XR_003051842.1	112488102	NC_024320.1	+	4	947	1201796	1206620	Intergenic
XR_003051736.1	103389524	NC_024320.1	+	6	3177	10060398	10071318	Intergenic
XR_003051683.1	112488026	NC_024320.1	+	4	1678	8475709	8483549	Antisense
XR_001761135.2	107989526	NC_024320.1	+	2	552	28481608	28482332	Intergenic
XR_522595.3	103389384	NC_024320.1	+	3	1605	6352420	6357174	Intergenic
XR_003051830.1	103389274	NC_024320.1	+	5	1184	5453271	5459490	Intergenic
XR_001761111.2	107989514	NC_024320.1	+	5	1070	22005577	22019540	Antisense
XR_001761061.2	107989499	NC_024320.1	+	3	1520	4391636	4393845	Intergenic
XR_003051693.1	112488029	NC_024320.1	+	5	1266	25646017	25649142	Intronic
XR_003051692.1	112488029	NC_024320.1	+	4	1384	25646017	25649142	Intronic
XR_003051779.1	112488068	NC_024320.1	+	2	629	1919182	1919904	Intergenic
XR_522583.3	103389257	NC_024320.1	+	3	1198	4842004	4857270	Antisense
XR_001761098.2	107989508	NC_024320.1	+	2	395	19801886	19804386	Intronic
XR_003051714.1	103389561	NC_024320.1	+	3	2914	10732636	10744965	Antisense
XR_003051793.1	112488075	NC_024320.1	+	3	1970	15455787	15458954	Intronic
XR_003051699.1	112488036	NC_024320.1	+	3	422	25374970	25421637	Antisense
XR_001761039.2	103389274	NC_024320.1	+	5	1188	5453271	5459490	Intergenic
XR_003051666.1	107989493	NC_024320.1	+	8	2460	27579542	27587442	Antisense
XR_003051845.1	112488105	NC_024320.1	+	3	769	18801670	18834123	Intergenic
XR_522656.3	103390168	NC_024320.1	+	7	2896	22530792	22539531	Antisense
XR_003051843.1	112488103	NC_024320.1	+	2	574	1222975	1223584	Antisense
XR_001761048.2	107989490	NC_024320.1	+	2	1561	28340613	28342204	Intergenic
XR_003051855.1	103389555	NC_024320.1	+	4	700	11109701	11117883	Intergenic
XR_003051828.1	107989470	NC_024320.1	+	2	2067	12372536	12374793	Intergenic
XR_003051799.1	112488079	NC_024320.1	+	3	396	20531021	20533215	Antisense
XR_003051725.1	103389600	NC_024320.1	+	4	486	11483178	11496131	Antisense
XR_003051687.1	103389999	NC_024320.1	+	5	549	18900016	18901924	Antisense
XR_003051777.1	112488067	NC_024320.1	+	3	692	26296415	26299162	Antisense
XR_003051841.1	103389064	NC_024320.1	+	6	1870	1483281	1498805	Antisense
XR_003051831.1	103389274	NC_024320.1	+	5	1248	5453270	5459490	Intergenic
XR_003051713.1	103389561	NC_024320.1	+	4	2779	10732636	10744965	Antisense
XR_003051721.1	112488043	NC_024320.1	+	3	882	22543318	22544547	Intronic
XR_522613.3	103389524	NC_024320.1	+	5	4129	10060398	10067863	Intergenic
XR_001761093.1	103389561	NC_024320.1	+	4	2583	10732636	10744965	Antisense
XR_003051664.1	107989493	NC_024320.1	+	7	2531	27579542	27587442	Antisense
XR_003051673.1	112488015	NC_024320.1	+	2	3738	2614865	2618777	Intergenic
XR_003051691.1	112488029	NC_024320.1	+	4	1115	25646017	25649142	Intronic
XR_003051814.1	112488087	NC_024320.1	+	3	4341	17568744	17598641	Intergenic
XR_003051719.1	112488042	NC_024320.1	+	2	387	8216762	8217197	Sense
XR_003051825.1	112488092	NC_024320.1	+	2	2963	22865336	22868345	Intronic
XR_522655.3	103390152	NC_024320.1	+	3	408	22727253	22732400	Antisense
XR_003051856.1	112488114	NC_024320.1	+	2	577	3536946	3537694	Antisense
XR_001761046.2	107989488	NC_024320.1	+	3	870	26179625	26180709	Intergenic
XR_003051836.1	112488098	NC_024320.1	+	3	6402	19626423	19636687	Intergenic
XR_003051835.1	112488097	NC_024320.1	+	2	1062	7063890	7066992	Intronic
XR_003051760.1	107989481	NC_024320.1	+	9	3315	16324472	16354261	Antisense
XR_522622.2	103389600	NC_024320.1	+	3	406	11483178	11495964	Antisense
XR_003051715.1	112488040	NC_024320.1	+	2	2641	6078024	6080778	Intergenic
XR_003051723.1	103390451	NC_024320.1	+	3	381	28144471	28150234	Antisense
XR_003051759.1	112488057	NC_024320.1	+	3	1480	16089417	16091465	Antisense
XR_003051734.1	103389524	NC_024320.1	+	6	3177	10060398	10067008	Intergenic
XR_003051761.1	107989481	NC_024320.1	+	10	3158	16324472	16354261	Antisense
XR_003051800.1	112488080	NC_024320.1	+	3	659	20822757	20831511	Intergenic
XR_003049139.1	112486623	NW_007585429.1	-	3	402	1	1416	Intergenic
XR_003052287.1	112488330	NC_024322.1	-	4	824	11102221	11104566	Antisense
XR_003052141.1	107989809	NC_024322.1	-	6	936	10967608	10973369	Intergenic
XR_003052320.1	112488346	NC_024322.1	-	4	564	2478881	2480510	Antisense
XR_003052235.1	112488315	NC_024322.1	-	9	2091	18249247	18287216	Intergenic
XR_003052171.1	112488288	NC_024322.1	-	2	1745	14558906	14560703	Antisense
XR_003052209.1	112488298	NC_024322.1	-	3	1845	7774780	7783778	Antisense
XR_003052155.1	103392455	NC_024322.1	-	7	1415	17514071	17521803	Intergenic
XR_001761311.2	107989799	NC_024322.1	-	4	1012	1359984	1363943	Antisense
XR_003052236.1	112488315	NC_024322.1	-	9	1478	18249247	18282379	Intergenic
XR_003052115.1	112488257	NC_024322.1	-	2	4630	2317990	2322656	Intergenic
XR_003052156.1	112488280	NC_024322.1	-	8	1132	10818724	10829337	Antisense
XR_003052251.1	103392190	NC_024322.1	-	4	457	12603845	12605606	Intergenic
XR_001761303.2	107989792	NC_024322.1	-	4	607	18508201	18524049	Intergenic
XR_003052211.1	112488300	NC_024322.1	-	3	1124	8314160	8329677	Antisense
XR_003052227.1	107989775	NC_024322.1	-	3	332	16536089	16538989	Antisense
XR_003052152.1	112488275	NC_024322.1	-	4	970	10306973	10311995	Intergenic
XR_522883.3	103392252	NC_024322.1	-	3	310	13961523	13965151	Intergenic
XR_003052116.1	112488258	NC_024322.1	-	5	847	7182397	7183877	Antisense
XR_001761312.2	107989799	NC_024322.1	-	5	1099	1359973	1363965	Antisense
XR_003052139.1	107989811	NC_024322.1	-	9	1270	12109312	12117231	Antisense
XR_001761254.2	107989769	NC_024322.1	-	3	924	4560003	4568930	Antisense
XR_003052239.1	112488315	NC_024322.1	-	9	1044	18250642	18282379	Intergenic
XR_003052157.1	112488280	NC_024322.1	-	7	1089	10818724	10829336	Antisense
XR_003052325.1	112488351	NC_024322.1	-	3	2387	3549068	3551787	Intronic
XR_003052119.1	103392182	NC_024322.1	-	18	7880	12399762	12552200	Antisense
XR_003052228.1	112488310	NC_024322.1	-	2	1558	16276511	16278108	Antisense
XR_003052226.1	112488309	NC_024322.1	-	2	2233	16477072	16479718	Antisense
XR_003052130.1	112488262	NC_024322.1	-	2	1835	13638592	13640576	Antisense
XR_003052153.1	112488276	NC_024322.1	-	2	2559	10316150	10320284	Intergenic
XR_522823.3	103391794	NC_024322.1	-	6	1249	5802612	5805697	Antisense
XR_003052214.1	112488303	NC_024322.1	-	2	1068	17463183	17464328	Intergenic
XR_003052134.1	103392492	NC_024322.1	-	3	1402	18293021	18295762	Intergenic
XR_001761294.2	107989785	NC_024322.1	-	4	726	2245616	2250860	Intergenic
XR_003052306.1	107989813	NC_024322.1	-	3	2884	4684289	4695965	Antisense
XR_003052154.1	112488277	NC_024322.1	-	2	1531	10320809	10322633	Intergenic
XR_001761302.2	107989792	NC_024322.1	-	4	634	18508201	18524049	Intergenic
XR_001761260.2	103392418	NC_024322.1	-	10	1698	16403135	16437528	Intergenic
XR_003052250.1	112488319	NC_024322.1	-	3	1064	2251106	2252460	Intergenic
XR_003052305.1	107989769	NC_024322.1	-	4	1041	4559997	4568930	Antisense
XR_001761338.2	107989813	NC_024322.1	-	4	2899	4681316	4696263	Antisense
XR_003052225.1	112488308	NC_024322.1	-	3	698	16534914	16535852	Antisense
XR_522856.2	103392036	NC_024322.1	-	4	1017	10027827	10033734	Intergenic
XR_522847.3	103391952	NC_024322.1	-	4	1294	8890791	8892911	Intergenic
XR_003052212.1	112488301	NC_024322.1	-	2	4669	8532634	8537449	Intergenic
XR_001761292.2	107989784	NC_024322.1	-	2	355	7251319	7253867	Antisense
XR_003052240.1	112488315	NC_024322.1	-	8	925	18250644	18282379	Intergenic
XR_003052234.1	112488315	NC_024322.1	-	8	1361	18249247	18282379	Intergenic
XR_003052323.1	112488349	NC_024322.1	-	2	5339	3715846	3721220	Intronic
XR_001761310.2	107989797	NC_024322.1	-	3	6684	4607022	4635687	Antisense
XR_003052221.1	103392418	NC_024322.1	-	10	1698	16403135	16437542	Intergenic
XR_003052159.1	112488280	NC_024322.1	-	7	1091	10818724	10829341	Antisense
XR_003052319.1	107989771	NC_024322.1	-	4	766	2473176	2474767	Antisense
XR_522827.3	103391839	NC_024322.1	-	4	513	6084338	6101010	Antisense
XR_522817.3	103391755	NC_024322.1	-	5	1722	3618393	3627842	Intronic
XR_522894.3	103392306	NC_024322.1	-	3	1869	15078364	15082351	Intergenic
XR_003052122.1	112488261	NC_024322.1	-	3	313	2110489	2114760	Antisense
XR_001761293.2	107989785	NC_024322.1	-	4	673	2245792	2250860	Intergenic
XR_003052140.1	107989809	NC_024322.1	-	6	1607	10968583	10973369	Intergenic
XR_003052117.1	112488259	NC_024322.1	-	3	448	7178183	7180103	Antisense
XR_001761253.2	107989769	NC_024322.1	-	4	1017	4560012	4568930	Antisense
XR_003052332.1	103392289	NC_024322.1	-	4	1417	14753332	14759778	Intergenic
XR_003052210.1	112488299	NC_024322.1	-	3	1178	8549943	8554602	Antisense
XR_003052197.1	112488295	NC_024322.1	-	2	499	5380323	5382055	Antisense
XR_522834.3	103391864	NC_024322.1	-	4	2565	6457611	6478772	Intergenic
XR_003052206.1	112488297	NC_024322.1	-	4	4822	8337558	8344414	Antisense
[truncated: 11,385 more rows]
