# Supplementary material for: ceRNA crosstalk mediated by ncRNAs is a novel regulatory mechanism in fish sex determination and differentiation
Source: HighWire-hosted journal article supplement (doi:10.1101/gr.275962.121), 2022-08-01
Supplement: Supplemental_Table_S3-2.xlsx [file Supplemental_Table_S3-2.xlsx]

## Sheet: Supplementary Table S3
Table S3. Classification and distribution of circRNAs in the Chinese tongue sole genome.
txID	gID	chrom	Strand	exonCount	txLength	txStart	txEnd	LocInfo
circ_529	circ_529	NC_024319.1	-	3	417	15540391	15542014	exonintron
circ_727	circ_727	NC_024319.1	+	4	672	11648630	11651203	multiexon
circ_1018	circ_1018	NC_024319.1	+	1	803	7935080	7935882	exon
circ_766	circ_766	NC_024319.1	+	3	361	5426178	5426820	multiexon
circ_345	circ_345	NC_024319.1	+	3	475	13083962	13089066	multiexon
circ_130	circ_130	NC_024319.1	+	2	433	15049370	15055985	multiexon
circ_922	circ_922	NC_024319.1	+	3	399	10698014	10704634	multiexon
circ_526	circ_526	NC_024319.1	+	4	1193	12620347	12625172	multiexon
circ_767	circ_767	NC_024319.1	+	4	447	10467966	10468690	multiexon
circ_1047	circ_1047	NC_024319.1	+	4	684	13057968	13059822	multiexon
circ_921	circ_921	NC_024319.1	+	10	1798	7697467	7726778	multiexon
circ_855	circ_855	NC_024319.1	+	3	541	21069483	21078025	multiexon
circ_806	circ_806	NC_024319.1	+	5	735	20804208	20805363	multiexon
circ_520	circ_520	NC_024319.1	+	4	570	6019247	6030681	multiexon
circ_344	circ_344	NC_024319.1	+	3	500	12958847	12973024	multiexon
circ_519	circ_519	NC_024319.1	+	4	285	4916129	4917772	multiexon
circ_920	circ_920	NC_024319.1	+	2	364	3160031	3162118	multiexon
circ_680	circ_680	NC_024319.1	+	4	452	8776495	8782345	multiexon
circ_342	circ_342	NC_024319.1	+	5	563	10861726	10864433	multiexon
circ_624	circ_624	NC_024319.1	+	8	912	5109498	5112130	multiexon
circ_678	circ_678	NC_024319.1	+	3	294	2399924	2421103	multiexon
circ_119	circ_119	NC_024319.1	+	2	311	10675935	10676473	multiexon
circ_804	circ_804	NC_024319.1	+	3	747	7990962	8011313	multiexon
circ_341	circ_341	NC_024319.1	+	2	246	10618452	10645465	multiexon
circ_1070	circ_1070	NC_024319.1	+	2	158	6017080	6019355	multiexon
circ_525	circ_525	NC_024319.1	+	3	305	12597624	12610318	multiexon
circ_533	circ_533	NC_024319.1	+	2	427	21600253	21604123	multiexon
circ_116	circ_116	NC_024319.1	+	5	668	5983996	5998253	multiexon
circ_728	circ_728	NC_024319.1	+	2	1268	13473784	13476396	multiexon
circ_805	circ_805	NC_024319.1	+	3	825	17539193	17540540	multiexon
circ_129	circ_129	NC_024319.1	+	3	605	13122799	13126775	multiexon
circ_521	circ_521	NC_024319.1	+	4	951	7990962	8021405	multiexon
circ_853	circ_853	NC_024319.1	+	3	390	17986104	17988998	multiexon
circ_123	circ_123	NC_024319.1	+	1	736	12229588	12230323	exon
circ_923	circ_923	NC_024319.1	+	5	574	12263499	12304050	multiexon
circ_854	circ_854	NC_024319.1	+	1	709	19607908	19608616	exon
circ_339	circ_339	NC_024319.1	+	3	476	5994631	5998253	multiexon
circ_133	circ_133	NC_024319.1	+	2	423	21269608	21271087	multiexon
circ_117	circ_117	NC_024319.1	+	2	348	5994631	5995797	multiexon
circ_803	circ_803	NC_024319.1	+	2	342	179549	180652	multiexon
circ_132	circ_132	NC_024319.1	+	4	563	19160204	19163993	multiexon
circ_128	circ_128	NC_024319.1	+	3	901	13105576	13107332	multiexon
circ_340	circ_340	NC_024319.1	+	2	985	7935080	7955952	multiexon
circ_338	circ_338	NC_024319.1	+	4	540	5983996	5995797	multiexon
circ_677	circ_677	NC_024319.1	+	2	275	412076	412456	multiexon
circ_346	circ_346	NC_024319.1	+	3	544	15049370	15064914	multiexon
circ_121	circ_121	NC_024319.1	+	3	418	11837570	11843229	multiexon
circ_125	circ_125	NC_024319.1	+	3	525	12924734	12926548	multiexon
circ_785	circ_785	NC_024319.1	+	3	712	14891756	14894969	multiexon
circ_127	circ_127	NC_024319.1	+	2	453	13035840	13038052	multiexon
circ_124	circ_124	NC_024319.1	+	1	731	12229593	12230323	exon
circ_531	circ_531	NC_024319.1	+	5	861	21049171	21085363	multiexon
circ_122	circ_122	NC_024319.1	+	4	539	11837570	11848659	multiexon
circ_522	circ_522	NC_024319.1	+	10	931	9802788	9805224	multiexon
circ_120	circ_120	NC_024319.1	+	5	1043	10675935	10683130	multiexon
circ_343	circ_343	NC_024319.1	+	3	336	12263499	12279983	multiexon
circ_625	circ_625	NC_024319.1	+	4	258	17903239	17904334	multiexon
circ_524	circ_524	NC_024319.1	+	4	299	12313334	12324475	multiexon
circ_131	circ_131	NC_024319.1	+	2	339	15438250	15438679	multiexon
circ_1017	circ_1017	NC_024319.1	+	3	367	879987	881011	multiexon
circ_337	circ_337	NC_024319.1	+	6	666	5109498	5111309	multiexon
circ_527	circ_527	NC_024319.1	+	15	2474	13008918	13089066	multiexon
circ_919	circ_919	NC_024319.1	+	13	1952	1109444	1117713	multiexon
circ_126	circ_126	NC_024319.1	+	2	315	12972146	12973024	multiexon
circ_118	circ_118	NC_024319.1	+	5	694	9192100	9194663	multiexon
circ_532	circ_532	NC_024319.1	+	4	714	21069483	21085363	multiexon
circ_523	circ_523	NC_024319.1	+	6	537	12301593	12324475	multiexon
circ_681	circ_681	NC_024319.1	+	6	690	8776495	8799132	multiexon
circ_528	circ_528	NC_024319.1	+	3	377	14146554	14151858	multiexon
circ_851	circ_851	NC_024319.1	+	2	291	2996582	2997536	multiexon
circ_852	circ_852	NC_024319.1	+	3	542	13058815	13059822	multiexon
circ_530	circ_530	NC_024319.1	+	2	426	18898889	18900652	multiexon
circ_679	circ_679	NC_024319.1	+	11	1383	5109498	5114081	multiexon
circ_784	circ_784	NC_024319.1	+	2	518	7584961	7587753	multiexon
circ_980	circ_980	NC_024319.1	+	2	490	398951	399782	multiexon
circ_410	circ_410	NC_024324.1	+	9	1460	11427000	11444099	multiexon
circ_815	circ_815	NC_024324.1	+	4	341	14679986	14693173	multiexon
circ_406	circ_406	NC_024324.1	+	4	313	5760009	5767508	multiexon
circ_408	circ_408	NC_024324.1	+	5	6633	6148759	6188713	multiexon
circ_404	circ_404	NC_024324.1	+	3	316	1896509	1897047	multiexon
circ_1029	circ_1029	NC_024324.1	+	2	152	2102026	2104335	multiexon
circ_205	circ_205	NC_024324.1	+	2	306	7277038	7277441	multiexon
circ_199	circ_199	NC_024324.1	+	6	766	3252528	3264686	multiexon
circ_203	circ_203	NC_024324.1	+	2	403	7059134	7063053	multiexon
circ_1055	circ_1055	NC_024324.1	+	3	264	3687805	3692608	multiexon
circ_409	circ_409	NC_024324.1	+	2	380	11427000	11428839	multiexon
circ_214	circ_214	NC_024324.1	+	1	669	11395493	11396161	exon
circ_202	circ_202	NC_024324.1	+	3	346	6218243	6224026	multiexon
circ_583	circ_583	NC_024324.1	+	9	7111	6148759	6245074	multiexon
circ_200	circ_200	NC_024324.1	+	3	359	5101858	5105591	multiexon
circ_411	circ_411	NC_024324.1	+	3	446	12509960	12512555	multiexon
circ_210	circ_210	NC_024324.1	+	3	399	11332204	11356580	multiexon
circ_587	circ_587	NC_024324.1	+	4	458	13483567	13486042	multiexon
circ_580	circ_580	NC_024324.1	+	3	611	3232393	3248525	multiexon
circ_212	circ_212	NC_024324.1	+	3	911	11356449	11396161	multiexon
circ_206	circ_206	NC_024324.1	+	4	566	7277038	7282391	multiexon
circ_1028	circ_1028	NC_024324.1	+	3	562	1992161	1994141	multiexon
circ_216	circ_216	NC_024324.1	+	4	652	11427000	11435560	multiexon
circ_201	circ_201	NC_024324.1	+	13	7663	6122308	6259197	multiexon
circ_934	circ_934	NC_024324.1	+	3	463	7227161	7241521	multiexon
circ_211	circ_211	NC_024324.1	+	5	1178	11332204	11396161	multiexon
circ_197	circ_197	NC_024324.1	+	2	738	3179517	3181583	multiexon
circ_207	circ_207	NC_024324.1	+	3	440	8037373	8040442	multiexon
circ_933	circ_933	NC_024324.1	+	2	821	5688528	5690268	multiexon
circ_887	circ_887	NC_024324.1	+	2	242	11356449	11377561	multiexon
circ_793	circ_793	NC_024324.1	+	2	288	3468766	3470528	multiexon
circ_208	circ_208	NC_024324.1	+	3	393	8065205	8065922	multiexon
circ_1056	circ_1056	NC_024324.1	+	4	340	7199287	7205940	multiexon
circ_1030	circ_1030	NC_024324.1	+	2	311	5864069	5883761	multiexon
circ_584	circ_584	NC_024324.1	+	6	914	9174728	9177966	multiexon
circ_585	circ_585	NC_024324.1	+	3	397	10307014	10318334	multiexon
circ_581	circ_581	NC_024324.1	+	11	973	5208851	5227840	multiexon
circ_1031	circ_1031	NC_024324.1	+	2	253	6223698	6224026	multiexon
circ_407	circ_407	NC_024324.1	+	6	6688	6122308	6188713	multiexon
circ_582	circ_582	NC_024324.1	+	2	466	5611262	5613711	multiexon
circ_993	circ_993	NC_024324.1	+	10	1542	11980749	11990649	multiexon
circ_652	circ_652	NC_024324.1	+	3	341	14088095	14088722	multiexon
circ_217	circ_217	NC_024324.1	+	2	389	15081136	15082361	multiexon
circ_405	circ_405	NC_024324.1	+	3	200	5577963	5586645	multiexon
circ_886	circ_886	NC_024324.1	+	9	7034	6122308	6224026	multiexon
circ_215	circ_215	NC_024324.1	+	3	470	11427000	11431137	multiexon
circ_204	circ_204	NC_024324.1	+	4	536	7225621	7241521	multiexon
circ_1032	circ_1032	NC_024324.1	+	6	990	11435379	11444099	multiexon
circ_885	circ_885	NC_024324.1	+	1	1465	5092688	5094152	exon
circ_586	circ_586	NC_024324.1	+	9	1082	11686765	11698955	multiexon
circ_209	circ_209	NC_024324.1	+	2	372	9176751	9177206	multiexon
circ_213	circ_213	NC_024324.1	+	2	779	11377452	11396161	multiexon
circ_198	circ_198	NC_024324.1	+	2	486	3232393	3237500	multiexon
circ_1037	circ_1037	NC_024321.1	+	9	899	10060772	10091214	multiexon
circ_435	circ_435	NC_024321.1	+	4	1242	10154978	10164496	multiexon
circ_944	circ_944	NC_024321.1	+	5	636	17268438	17273735	multiexon
circ_438	circ_438	NC_024321.1	+	4	1216	16696044	16702073	multiexon
circ_27	circ_27	NC_024321.1	+	2	425	19299907	19304370	multiexon
circ_825	circ_825	NC_024321.1	+	5	456	5455050	5476624	multiexon
circ_897	circ_897	NC_024321.1	+	5	888	4285666	4289058	multiexon
circ_436	circ_436	NC_024321.1	+	2	384	15673905	15674408	multiexon
circ_599	circ_599	NC_024321.1	+	3	328	5464619	5476624	multiexon
circ_437	circ_437	NC_024321.1	+	2	283	15777417	15777814	multiexon
circ_251	circ_251	NC_024321.1	+	7	860	9848150	9849943	multiexon
circ_249	circ_249	NC_024321.1	+	3	421	7352968	7354882	multiexon
circ_22	circ_22	NC_024321.1	+	3	437	1436323	1437457	multiexon
circ_23	circ_23	NC_024321.1	+	2	244	5473612	5476624	multiexon
circ_441	circ_441	NC_024321.1	+	7	1209	18611483	18620626	multiexon
circ_1000	circ_1000	NC_024321.1	+	9	1179	10290798	10298163	multiexon
circ_25	circ_25	NC_024321.1	+	4	583	7352968	7359218	multiexon
circ_254	circ_254	NC_024321.1	+	5	2656	18434652	18438126	multiexon
circ_779	circ_779	NC_024321.1	+	11	1098	1575411	1579873	multiexon
circ_747	circ_747	NC_024321.1	+	4	642	17653637	17655777	multiexon
circ_28	circ_28	NC_024321.1	+	3	469	20034566	20035379	multiexon
circ_439	circ_439	NC_024321.1	+	3	678	18575166	18591653	multiexon
circ_253	circ_253	NC_024321.1	+	6	323	16727353	16741035	multiexon
circ_248	circ_248	NC_024321.1	+	5	431	6788962	6797534	multiexon
circ_252	circ_252	NC_024321.1	+	2	293	16311018	16312640	multiexon
circ_24	circ_24	NC_024321.1	+	5	691	7347813	7359218	multiexon
circ_440	circ_440	NC_024321.1	+	2	471	18581855	18591653	multiexon
circ_250	circ_250	NC_024321.1	+	5	420	8515968	8527093	multiexon
circ_434	circ_434	NC_024321.1	+	4	529	7347813	7354882	multiexon
circ_705	circ_705	NC_024321.1	+	3	358	16122481	16123392	multiexon
circ_26	circ_26	NC_024321.1	+	4	351	8515968	8521733	multiexon
circ_600	circ_600	NC_024321.1	+	3	270	7337652	7347920	multiexon
circ_979	circ_979	NW_007585117.1	+	6	537	332395	339432	multiexon
circ_892	circ_892	NW_007585132.1	+	7	949	127511	130778	multiexon
circ_247	circ_247	NW_007585144.1	+	3	412	62011	62621	multiexon
circ_492	circ_492	NC_024309.1	+	2	415	12531042	12541164	multiexon
circ_716	circ_716	NC_024309.1	+	3	287	5673129	5675008	multiexon
circ_95	circ_95	NC_024309.1	+	2	284	10889671	10890413	multiexon
circ_669	circ_669	NC_024309.1	+	2	245	15737021	15741504	multiexon
circ_717	circ_717	NC_024309.1	+	1	763	8427663	8428425	exon
circ_97	circ_97	NC_024309.1	+	3	355	14527836	14565770	multiexon
circ_1065	circ_1065	NC_024309.1	+	4	357	15489059	15489992	multiexon
circ_494	circ_494	NC_024309.1	+	3	879	15733416	15736166	multiexon
circ_614	circ_614	NC_024309.1	+	8	1673	15849136	15851974	multiexon
circ_493	circ_493	NC_024309.1	+	2	367	12586706	12592904	multiexon
circ_667	circ_667	NC_024309.1	+	2	337	11247668	11249140	multiexon
circ_90	circ_90	NC_024309.1	+	4	1147	5468106	5470539	multiexon
circ_306	circ_306	NC_024309.1	+	2	288	5476392	5479749	multiexon
circ_670	circ_670	NC_024309.1	+	9	1784	15849136	15852276	multiexon
circ_91	circ_91	NC_024309.1	+	5	1317	5468106	5476561	multiexon
circ_310	circ_310	NC_024309.1	+	6	1039	12876602	12889503	Intron
circ_305	circ_305	NC_024309.1	+	3	753	2081776	2086062	multiexon
circ_613	circ_613	NC_024309.1	+	4	538	8878861	8880506	multiexon
circ_308	circ_308	NC_024309.1	+	5	646	11325743	11327513	multiexon
circ_309	circ_309	NC_024309.1	+	2	319	11876473	11877460	multiexon
circ_615	circ_615	NC_024309.1	+	6	1357	15850116	15851974	multiexon
circ_100	circ_100	NC_024309.1	+	10	1825	15848457	15852276	multiexon
circ_967	circ_967	NC_024309.1	+	3	996	12490410	12541164	multiexon
circ_94	circ_94	NC_024309.1	+	3	408	9999595	10000743	multiexon
circ_495	circ_495	NC_024309.1	+	1	416	15735751	15736166	exon
circ_1064	circ_1064	NC_024309.1	+	3	399	11816915	11819734	multiexon
circ_970	circ_970	NC_024309.1	+	7	731	14974378	14981481	multiexon
circ_307	circ_307	NC_024309.1	+	5	638	9848287	9849418	multiexon
circ_92	circ_92	NC_024309.1	+	4	515	8876171	8880016	multiexon
circ_312	circ_312	NC_024309.1	+	3	331	16223148	16224931	multiexon
circ_668	circ_668	NC_024309.1	+	2	254	11326926	11327513	multiexon
circ_98	circ_98	NC_024309.1	+	34	4192	14716560	14737684	multiexon
circ_911	circ_911	NC_024309.1	+	4	399	4851071	4858558	multiexon
circ_96	circ_96	NC_024309.1	+	3	400	14500653	14528018	multiexon
circ_969	circ_969	NC_024309.1	+	4	457	14974378	14979010	multiexon
circ_840	circ_840	NC_024309.1	+	4	305	15209990	15211535	multiexon
circ_801	circ_801	NC_024309.1	+	2	362	12876602	12880055	Intron
circ_99	circ_99	NC_024309.1	+	5	426	15209990	15213679	multiexon
circ_1014	circ_1014	NC_024309.1	+	6	510	10057559	10066341	multiexon
circ_839	circ_839	NC_024309.1	+	1	297	10982657	10982953	Intergenic
circ_311	circ_311	NC_024309.1	+	5	1889	15701563	15708177	multiexon
circ_491	circ_491	NC_024309.1	+	1	581	12490410	12490990	exon
circ_968	circ_968	NC_024309.1	+	5	869	12552777	12572637	multiexon
circ_93	circ_93	NC_024309.1	+	3	484	8878861	8880016	multiexon
circ_388	circ_388	NC_024310.1	+	3	238	17050972	17058939	multiexon
circ_695	circ_695	NC_024310.1	+	11	962	19510802	19522712	multiexon
circ_383	circ_383	NC_024310.1	+	3	444	10186931	10194403	multiexon
circ_876	circ_876	NC_024310.1	+	2	262	13029570	13052033	multiexon
circ_561	circ_561	NC_024310.1	+	5	585	4453350	4465434	multiexon
circ_791	circ_791	NC_024310.1	+	2	417	10736645	10771630	multiexon
circ_874	circ_874	NC_024310.1	+	2	414	12475719	12480436	Intron
circ_737	circ_737	NC_024310.1	+	4	640	1841849	1851147	multiexon
circ_559	circ_559	NC_024310.1	+	3	571	1841849	1844601	multiexon
circ_1075	circ_1075	NC_024310.1	+	3	343	6181630	6182259	multiexon
circ_173	circ_173	NC_024310.1	+	2	407	11443082	11444880	multiexon
circ_167	circ_167	NC_024310.1	+	8	981	4453350	4475269	multiexon
circ_166	circ_166	NC_024310.1	+	6	611	4417352	4426030	multiexon
circ_175	circ_175	NC_024310.1	+	7	644	17050972	17064629	multiexon
circ_389	circ_389	NC_024310.1	+	5	485	17058861	17064629	multiexon
circ_168	circ_168	NC_024310.1	+	3	389	4464809	4465434	multiexon
circ_170	circ_170	NC_024310.1	+	3	396	4472937	4475269	multiexon
circ_385	circ_385	NC_024310.1	+	2	3983	11380318	11390556	multiexon
circ_380	circ_380	NC_024310.1	+	3	616	4435947	4453500	multiexon
circ_387	circ_387	NC_024310.1	+	6	914	14996009	15005243	multiexon
circ_694	circ_694	NC_024310.1	+	4	364	12301316	12302704	multiexon
circ_172	circ_172	NC_024310.1	+	1	327	10063248	10063574	exon
circ_174	circ_174	NC_024310.1	+	12	3265	16933373	16945716	multiexon
circ_379	circ_379	NC_024310.1	+	1	1163	1574592	1575754	exon
circ_875	circ_875	NC_024310.1	+	2	300	13006056	13029741	multiexon
circ_1024	circ_1024	NC_024310.1	+	8	1269	10165526	10176877	multiexon
circ_381	circ_381	NC_024310.1	+	2	373	9150140	9150594	multiexon
circ_639	circ_639	NC_024310.1	+	2	320	8056903	8057849	multiexon
circ_877	circ_877	NC_024310.1	+	4	406	17061410	17064629	multiexon
circ_165	circ_165	NC_024310.1	+	3	1280	1574592	1583739	multiexon
circ_562	circ_562	NC_024310.1	+	2	269	8585965	8588805	multiexon
circ_169	circ_169	NC_024310.1	+	6	785	4464809	4475269	multiexon
circ_563	circ_563	NC_024310.1	+	1	3841	11380318	11384158	exon
circ_384	circ_384	NC_024310.1	+	3	1167	11213579	11218413	multiexon
circ_560	circ_560	NC_024310.1	+	4	426	4420293	4426030	multiexon
circ_929	circ_929	NC_024310.1	+	2	308	12936462	12941365	multiexon
circ_928	circ_928	NC_024310.1	+	10	2589	5160412	5166915	multiexon
circ_382	circ_382	NC_024310.1	+	3	418	10150453	10151710	multiexon
circ_171	circ_171	NC_024310.1	+	3	319	7296353	7296925	multiexon
circ_814	circ_814	NC_024310.1	+	4	456	363808	364669	multiexon
circ_738	circ_738	NC_024310.1	+	3	534	18533539	18534353	multiexon
circ_1023	circ_1023	NC_024310.1	+	5	569	8599781	8621946	multiexon
circ_386	circ_386	NC_024310.1	+	3	314	13029570	13060486	multiexon
circ_813	circ_813	NC_024310.1	+	2	240	358711	359457	multiexon
circ_924	circ_924	NW_007585120.1	+	9	1228	122629	125595	multiexon
circ_164	circ_164	NC_024328.1	+	2	432	21388678	21389207	multiexon
circ_163	circ_163	NC_024328.1	+	4	379	20015992	20017559	multiexon
circ_637	circ_637	NC_024328.1	+	5	652	2356458	2358441	multiexon
circ_870	circ_870	NC_024328.1	+	3	433	15366694	15368657	multiexon
circ_374	circ_374	NC_024328.1	+	5	636	3947071	3950978	multiexon
circ_989	circ_989	NC_024328.1	+	9	1130	8138661	8142174	multiexon
circ_1073	circ_1073	NC_024328.1	+	6	589	5986072	5994060	multiexon
circ_735	circ_735	NC_024328.1	+	2	252	9413700	9414998	multiexon
circ_693	circ_693	NC_024328.1	+	6	659	15324596	15325864	multiexon
circ_162	circ_162	NC_024328.1	+	4	455	14720093	14720925	multiexon
circ_690	circ_690	NC_024328.1	+	9	740	7186322	7191093	multiexon
circ_869	circ_869	NC_024328.1	+	5	594	14518434	14520008	multiexon
circ_868	circ_868	NC_024328.1	+	3	283	13845707	13846215	multiexon
circ_377	circ_377	NC_024328.1	+	2	371	9416857	9420062	multiexon
circdmrt1	circdmrt1	NC_024328.1	+	1	190	8545042	8570473	exon
circ_554	circ_554	NC_024328.1	+	6	621	9064291	9066102	multiexon
circ_866	circ_866	NC_024328.1	+	4	363	8839865	8843593	multiexon
circ_773	circ_773	NC_024328.1	+	2	374	13919029	13919505	multiexon
circ_375	circ_375	NC_024328.1	+	4	518	5029357	5031832	multiexon
circ_871	circ_871	NC_024328.1	+	8	747	16556445	16561193	multiexon
circ_553	circ_553	NC_024328.1	+	5	493	5986072	5988626	multiexon
circ_555	circ_555	NC_024328.1	+	1	632	9989298	9989929	exon
circ_873	circ_873	NC_024328.1	+	3	483	19781966	19783111	multiexon
circ_557	circ_557	NC_024328.1	+	4	531	20073223	20083355	multiexon
circ_692	circ_692	NC_024328.1	+	2	287	7329346	7330676	multiexon
circ_865	circ_865	NC_024328.1	+	5	688	4094157	4095346	multiexon
circ_558	circ_558	NC_024328.1	+	4	356	20433169	20435145	multiexon
circ_789	circ_789	NC_024328.1	+	2	294	1710596	1711749	multiexon
circ_378	circ_378	NC_024328.1	+	2	329	15248800	15249394	multiexon
circ_1074	circ_1074	NC_024328.1	+	3	226	7340673	7344170	multiexon
circ_373	circ_373	NC_024328.1	+	3	298	2326344	2327004	multiexon
circ_736	circ_736	NC_024328.1	+	3	333	21386920	21388097	multiexon
circ_556	circ_556	NC_024328.1	+	4	484	14518856	14520008	multiexon
circ_790	circ_790	NC_024328.1	+	7	674	5986072	5996704	multiexon
circ_552	circ_552	NC_024328.1	+	3	368	3323306	3325069	multiexon
circ_161	circ_161	NC_024328.1	+	4	531	4504703	4505968	multiexon
circ_867	circ_867	NC_024328.1	+	3	435	11761808	11764524	multiexon
circ_376	circ_376	NC_024328.1	+	4	507	5842744	5845009	multiexon
circ_872	circ_872	NC_024328.1	+	1	362	17051103	17051464	exon
circ_638	circ_638	NC_024328.1	+	3	449	10301610	10304410	multiexon
circ_691	circ_691	NC_024328.1	+	2	292	7329341	7330676	multiexon
circ_912	circ_912	NC_024312.1	+	5	502	172559	183349	multiexon
circ_844	circ_844	NC_024312.1	+	5	684	17897560	17936297	multiexon
circ_843	circ_843	NC_024312.1	+	6	672	8835768	8840180	multiexon
circ_513	circ_513	NC_024312.1	+	5	427	18724291	18725745	multiexon
circ_914	circ_914	NC_024312.1	+	5	478	6352200	6357590	multiexon
circ_1066	circ_1066	NC_024312.1	+	2	296	4097337	4126014	multiexon
circ_325	circ_325	NC_024312.1	+	2	299	6344842	6348185	multiexon
circ_324	circ_324	NC_024312.1	+	2	353	6092481	6098372	multiexon
circ_510	circ_510	NC_024312.1	+	4	432	16772310	16775940	multiexon
circ_502	circ_502	NC_024312.1	+	2	407	738936	739873	multiexon
circ_106	circ_106	NC_024312.1	+	3	318	9474404	9476244	multiexon
circ_512	circ_512	NC_024312.1	+	2	1118	18533529	18534790	multiexon
circ_322	circ_322	NC_024312.1	+	2	431	5526233	5529204	multiexon
circ_913	circ_913	NC_024312.1	+	3	332	5543764	5551409	multiexon
circ_619	circ_619	NC_024312.1	+	4	386	5004983	5006906	multiexon
circ_105	circ_105	NC_024312.1	+	3	318	8273606	8277848	multiexon
circ_973	circ_973	NC_024312.1	+	12	1784	1186743	1190269	multiexon
circ_107	circ_107	NC_024312.1	+	4	584	9936500	9940063	multiexon
circ_509	circ_509	NC_024312.1	+	3	525	4169437	4180032	multiexon
circ_507	circ_507	NC_024312.1	+	5	1631	3223159	3227097	multiexon
circ_618	circ_618	NC_024312.1	+	2	315	4962721	4963165	multiexon
circ_103	circ_103	NC_024312.1	+	2	270	3177855	3192238	multiexon
circ_974	circ_974	NC_024312.1	+	4	637	5508075	5529204	multiexon
circ_104	circ_104	NC_024312.1	+	2	329	4961854	4962274	multiexon
circ_845	circ_845	NC_024312.1	+	7	943	17897560	17952525	multiexon
circ_511	circ_511	NC_024312.1	+	4	631	17145168	17148562	multiexon
circ_783	circ_783	NC_024312.1	+	4	431	9039409	9040709	multiexon
circ_327	circ_327	NC_024312.1	+	1	161	13416364	13416524	exon
circ_503	circ_503	NC_024312.1	+	3	497	1185645	1186333	multiexon
circ_672	circ_672	NC_024312.1	+	2	310	18088884	18089285	multiexon
circ_109	circ_109	NC_024312.1	+	4	446	14909391	14913257	multiexon
circ_326	circ_326	NC_024312.1	+	3	314	7060580	7061442	multiexon
circ_506	circ_506	NC_024312.1	+	15	3789	3219547	3229503	multiexon
circ_1067	circ_1067	NC_024312.1	+	4	316	12580868	12591804	multiexon
circ_328	circ_328	NC_024312.1	+	2	497	15469790	15479564	multiexon
circ_110	circ_110	NC_024312.1	+	2	419	17245625	17248381	multiexon
circ_329	circ_329	NC_024312.1	+	3	470	17240107	17248381	multiexon
circ_782	circ_782	NC_024312.1	+	9	1156	199682	203107	multiexon
circ_323	circ_323	NC_024312.1	+	3	546	5567149	5570558	multiexon
circ_108	circ_108	NC_024312.1	+	3	450	9963038	9964222	multiexon
circ_763	circ_763	NC_024312.1	+	7	750	14568088	14575837	multiexon
circ_508	circ_508	NC_024312.1	+	2	248	3270236	3272599	multiexon
circ_504	circ_504	NC_024312.1	+	7	1123	2181837	2186141	multiexon
circ_762	circ_762	NC_024312.1	+	3	402	11327178	11328007	multiexon
circ_723	circ_723	NC_024312.1	+	2	135	12620023	12620974	multiexon
circ_505	circ_505	NC_024312.1	+	3	288	2588944	2590566	multiexon
circ_1044	circ_1044	NC_024312.1	+	2	259	17949381	17952525	multiexon
circ_975	circ_975	NC_024312.1	+	10	1274	18088531	18099703	multiexon
circ_321	circ_321	NC_024312.1	+	2	376	4169437	4172850	multiexon
circ_415	circ_415	NC_024308.1	+	3	386	2003165	2004523	multiexon
circ_5	circ_5	NC_024308.1	+	2	322	9985227	9991171	multiexon
circ_420	circ_420	NC_024308.1	+	2	248	9226828	9239242	multiexon
circ_820	circ_820	NC_024308.1	+	4	418	11554400	11556390	Intergenic
circ_9	circ_9	NC_024308.1	+	11	3332	18146639	18194809	Intron
circ_423	circ_423	NC_024308.1	+	1	529	11395210	11395738	exon
circ_230	circ_230	NC_024308.1	+	9	1072	7822310	7829056	multiexon
circ_8	circ_8	NC_024308.1	+	10	3218	18146639	18178545	Intron
circ_417	circ_417	NC_024308.1	+	3	397	4588867	4592202	multiexon
circ_1057	circ_1057	NC_024308.1	+	5	1430	700187	720845	multiexon
circ_228	circ_228	NC_024308.1	+	3	455	1642217	1642860	multiexon
circ_743	circ_743	NC_024308.1	+	2	693	7430968	7431740	multiexon
circ_819	circ_819	NC_024308.1	+	2	372	10791939	10792524	multiexon
circ_1035	circ_1035	NC_024308.1	+	2	279	8195941	8196329	multiexon
circ_744	circ_744	NC_024308.1	+	14	1795	16035070	16042117	multiexon
circ_656	circ_656	NC_024308.1	+	2	392	661458	680302	multiexon
circ_425	circ_425	NC_024308.1	+	1	268	17149377	17149644	exon
circ_424	circ_424	NC_024308.1	+	4	410	16967175	16968398	multiexon
circ_236	circ_236	NC_024308.1	+	4	394	18623534	18628287	Intron
circ_235	circ_235	NC_024308.1	+	2	439	18316700	18317224	Intron
circ_233	circ_233	NC_024308.1	+	3	387	18205187	18208484	Intron
circ_2	circ_2	NC_024308.1	+	1	549	1947981	1948529	exon
circ_938	circ_938	NC_024308.1	+	3	405	5682484	5684846	multiexon
circ_234	circ_234	NC_024308.1	+	2	304	18256540	18257112	Intron
circ_7	circ_7	NC_024308.1	+	3	507	17149377	17166508	multiexon
circ_999	circ_999	NC_024308.1	+	2	405	10359223	10359715	multiexon
circ_422	circ_422	NC_024308.1	+	2	295	10229486	10231944	multiexon
circ_231	circ_231	NC_024308.1	+	2	198	15999960	16000437	multiexon
circ_940	circ_940	NC_024308.1	+	3	220	17545999	17555632	multiexon
circ_237	circ_237	NC_024308.1	+	3	310	18627051	18628287	Intron
circ_4	circ_4	NC_024308.1	+	2	312	9294617	9323793	multiexon
circ_939	circ_939	NC_024308.1	+	4	366	9066086	9066927	multiexon
circ_421	circ_421	NC_024308.1	+	3	352	9294617	9351124	multiexon
circ_232	circ_232	NC_024308.1	+	4	497	17233389	17236391	multiexon
circ_658	circ_658	NC_024308.1	+	2	454	11936815	11937890	multiexon
circ_427	circ_427	NC_024308.1	+	3	354	17496593	17497720	multiexon
circ_10	circ_10	NC_024308.1	+	3	428	18256540	18261179	Intron
circ_998	circ_998	NC_024308.1	+	7	1179	6835119	6843954	Intron
circ_821	circ_821	NC_024308.1	+	3	540	17634807	17635682	multiexon
circ_595	circ_595	NC_024308.1	+	2	354	5419023	5419992	multiexon
circ_593	circ_593	NC_024308.1	+	8	1277	723453	732187	multiexon
circ_6	circ_6	NC_024308.1	+	9	1048	11511333	11514195	multiexon
circ_3	circ_3	NC_024308.1	+	2	453	7799353	7800974	Intron
circ_11	circ_11	NC_024308.1	+	4	416	18391548	18393627	Intron
circ_890	circ_890	NC_024308.1	+	5	423	5019345	5033821	multiexon
circ_818	circ_818	NC_024308.1	+	4	459	8038445	8040101	multiexon
circ_594	circ_594	NC_024308.1	+	2	343	1968423	1969021	multiexon
circ_1034	circ_1034	NC_024308.1	+	3	949	1883187	1884561	multiexon
circ_596	circ_596	NC_024308.1	+	3	440	6860756	6862180	multiexon
circ_704	circ_704	NC_024308.1	+	9	1099	1250980	1261280	multiexon
circ_657	circ_657	NC_024308.1	+	5	1382	1353010	1358295	multiexon
circ_426	circ_426	NC_024308.1	+	5	674	17233389	17239910	multiexon
circ_997	circ_997	NC_024308.1	+	5	389	5841311	5843824	multiexon
circ_891	circ_891	NC_024308.1	+	2	244	11273100	11273428	multiexon
circ_229	circ_229	NC_024308.1	+	4	353	5759919	5762160	multiexon
circ_937	circ_937	NC_024308.1	+	19	2639	2010337	2017200	multiexon
circ_429	circ_429	NC_024308.1	+	8	776	18614460	18628287	Intron
circ_428	circ_428	NC_024308.1	+	4	382	18614460	18617784	Intron
circ_419	circ_419	NC_024308.1	+	5	540	9071688	9080699	multiexon
circ_418	circ_418	NC_024308.1	+	4	586	5672748	5675684	multiexon
circ_1	circ_1	NC_024308.1	+	3	590	713669	720377	multiexon
circ_416	circ_416	NC_024308.1	+	3	1697	2412734	2417477	multiexon
circ_746	circ_746	NW_007585116.1	+	8	853	204983	217514	multiexon
circ_842	circ_842	NC_024317.1	+	4	515	19199661	19207149	multiexon
circ_721	circ_721	NC_024317.1	+	11	1388	15653342	15660675	multiexon
circ_501	circ_501	NC_024317.1	+	5	513	20332561	20333800	multiexon
circ_313	circ_313	NC_024317.1	+	1	505	580321	580825	exon
circ_617	circ_617	NC_024317.1	+	3	369	19567580	19569780	multiexon
circ_616	circ_616	NC_024317.1	+	6	987	14491972	14502795	multiexon
circ_318	circ_318	NC_024317.1	+	7	836	7703933	7713106	multiexon
circ_971	circ_971	NC_024317.1	+	2	360	3013240	3013698	multiexon
circ_718	circ_718	NC_024317.1	+	3	432	8410688	8416430	multiexon
circ_319	circ_319	NC_024317.1	+	4	429	7865393	7872177	multiexon
circ_760	circ_760	NC_024317.1	+	3	271	5561783	5566834	multiexon
circ_1043	circ_1043	NC_024317.1	+	3	234	15328531	15329259	multiexon
circ_719	circ_719	NC_024317.1	+	5	610	8424654	8439028	multiexon
circ_314	circ_314	NC_024317.1	+	6	642	921020	937950	multiexon
circ_102	circ_102	NC_024317.1	+	2	492	13754255	13758035	multiexon
circ_499	circ_499	NC_024317.1	+	3	409	17642355	17642971	multiexon
circ_722	circ_722	NC_024317.1	+	6	673	20377045	20379063	multiexon
circ_841	circ_841	NC_024317.1	+	5	420	5101471	5104846	multiexon
circ_497	circ_497	NC_024317.1	+	2	410	9246352	9254478	multiexon
circ_671	circ_671	NC_024317.1	+	2	246	19569147	19569780	multiexon
circ_802	circ_802	NC_024317.1	+	4	2095	1364093	1371205	multiexon
circ_972	circ_972	NC_024317.1	+	3	388	6334469	6336064	multiexon
circ_761	circ_761	NC_024317.1	+	4	295	11136723	11139369	Intron
circ_317	circ_317	NC_024317.1	+	3	697	6413208	6421894	multiexon
circ_720	circ_720	NC_024317.1	+	1	666	14296060	14296725	exon
circ_101	circ_101	NC_024317.1	+	4	708	13391853	13393184	multiexon
circ_500	circ_500	NC_024317.1	+	3	386	19410224	19418998	multiexon
circ_498	circ_498	NC_024317.1	+	1	685	13728171	13728855	exon
circ_496	circ_496	NC_024317.1	+	2	160	1581193	1586029	multiexon
circ_320	circ_320	NC_024317.1	+	4	434	14147733	14148994	multiexon
circ_316	circ_316	NC_024317.1	+	1	348	4603355	4603702	exon
circ_315	circ_315	NC_024317.1	+	1	714	2759663	2760376	exon
circ_901	circ_901	NC_024325.1	+	5	797	12262006	12303578	multiexon
circ_36	circ_36	NC_024325.1	+	1	985	8805733	8806717	exon
circ_260	circ_260	NC_024325.1	+	2	359	7299990	7309230	multiexon
circ_33	circ_33	NC_024325.1	+	4	407	5731775	5745096	multiexon
circ_946	circ_946	NC_024325.1	+	7	980	10644451	10655716	multiexon
circ_448	circ_448	NC_024325.1	+	3	535	3278529	3281393	multiexon
circ_452	circ_452	NC_024325.1	+	2	285	17506940	17509365	multiexon
circ_948	circ_948	NC_024325.1	+	11	3507	17613817	17661111	multiexon
circ_947	circ_947	NC_024325.1	+	3	403	15306880	15309845	multiexon
circ_827	circ_827	NC_024325.1	+	2	581	12314346	12317596	multiexon
circ_37	circ_37	NC_024325.1	+	4	408	9469569	9474415	multiexon
circ_899	circ_899	NC_024325.1	+	3	1056	9702028	9786448	multiexon
circ_44	circ_44	NC_024325.1	+	5	987	17657987	17661111	multiexon
circ_451	circ_451	NC_024325.1	+	3	478	8848398	8859716	multiexon
circ_42	circ_42	NC_024325.1	+	2	767	15686104	15688502	multiexon
circ_257	circ_257	NC_024325.1	+	3	3117	707243	720006	multiexon
circ_1060	circ_1060	NC_024325.1	+	2	336	1245971	1248251	multiexon
circ_264	circ_264	NC_024325.1	+	4	1903	14754740	14759281	multiexon
circ_43	circ_43	NC_024325.1	+	10	2469	17628351	17661111	multiexon
circ_707	circ_707	NC_024325.1	+	4	386	14273850	14275282	multiexon
circ_32	circ_32	NC_024325.1	+	2	312	4929275	4930409	multiexon
circ_30	circ_30	NC_024325.1	+	2	3002	715604	720006	multiexon
circ_898	circ_898	NC_024325.1	+	3	450	7251811	7309230	multiexon
circ_795	circ_795	NC_024325.1	+	3	406	15327599	15328238	multiexon
circ_749	circ_749	NC_024325.1	+	3	318	11036034	11037247	multiexon
circ_449	circ_449	NC_024325.1	+	7	1282	3278529	3290293	multiexon
circ_35	circ_35	NC_024325.1	+	3	426	6461983	6469429	multiexon
circ_826	circ_826	NC_024325.1	+	2	468	1829737	1830301	multiexon
circ_34	circ_34	NC_024325.1	+	4	1047	5947058	5948777	multiexon
circ_40	circ_40	NC_024325.1	+	4	638	12293899	12303578	multiexon
circ_262	circ_262	NC_024325.1	+	2	486	8870522	8877888	multiexon
circ_750	circ_750	NC_024325.1	+	5	574	15304558	15320717	multiexon
circ_265	circ_265	NC_024325.1	+	4	485	15304558	15309845	multiexon
circ_39	circ_39	NC_024325.1	+	2	954	9702028	9740660	multiexon
circ_41	circ_41	NC_024325.1	+	3	1806	14757231	14759281	multiexon
circ_31	circ_31	NC_024325.1	+	4	400	2022074	2027929	multiexon
circ_828	circ_828	NC_024325.1	+	3	1502	17613817	17631860	multiexon
circ_601	circ_601	NC_024325.1	+	4	477	3879287	3880690	multiexon
circ_945	circ_945	NC_024325.1	+	12	1185	2002933	2038432	multiexon
circ_263	circ_263	NC_024325.1	+	1	744	9702028	9702771	exon
circ_453	circ_453	NC_024325.1	+	3	406	17506940	17533261	multiexon
circ_450	circ_450	NC_024325.1	+	5	580	3879287	3881946	multiexon
circ_900	circ_900	NC_024325.1	+	2	312	9740451	9786448	multiexon
circ_1002	circ_1002	NC_024325.1	+	3	398	12300513	12303578	multiexon
circ_748	circ_748	NC_024325.1	+	6	569	9469569	9483701	multiexon
circ_258	circ_258	NC_024325.1	+	1	327	911977	912303	exon
circ_38	circ_38	NC_024325.1	+	2	404	9558930	9566365	multiexon
circ_259	circ_259	NC_024325.1	+	3	498	4699552	4701721	multiexon
circ_261	circ_261	NC_024325.1	+	4	1463	8805733	8859716	multiexon
circ_751	circ_751	NC_024325.1	+	2	464	17628351	17631860	multiexon
circ_191	circ_191	NW_007585141.1	+	5	729	44477	45573	multiexon
circ_81	circ_81	NC_024313.1	+	3	769	8916480	8920452	multiexon
circ_910	circ_910	NC_024313.1	+	1	391	10912548	10912938	Intron
circ_612	circ_612	NC_024313.1	+	2	234	9610264	9610570	multiexon
circ_909	circ_909	NC_024313.1	+	5	1049	6853437	6874832	multiexon
circ_88	circ_88	NC_024313.1	+	2	318	13117297	13118014	multiexon
circ_715	circ_715	NC_024313.1	+	6	562	12097211	12100126	multiexon
circ_666	circ_666	NC_024313.1	+	4	354	12063394	12068663	multiexon
circ_83	circ_83	NC_024313.1	+	2	291	12070123	12071150	multiexon
circ_302	circ_302	NC_024313.1	+	3	390	9605983	9610570	multiexon
circ_79	circ_79	NC_024313.1	+	3	389	6884898	6894321	multiexon
circ_301	circ_301	NC_024313.1	+	4	434	9600996	9610570	multiexon
circ_713	circ_713	NC_024313.1	+	2	346	2004933	2007225	multiexon
circ_488	circ_488	NC_024313.1	+	3	525	8556410	8560263	multiexon
circ_482	circ_482	NC_024313.1	+	5	842	6327052	6335913	multiexon
circ_76	circ_76	NC_024313.1	+	3	731	6428076	6433956	multiexon
circ_87	circ_87	NC_024313.1	+	3	480	13084725	13085736	multiexon
circ_1041	circ_1041	NC_024313.1	+	2	347	7702559	7703290	multiexon
circ_759	circ_759	NC_024313.1	+	2	285	13762467	13762847	Intron
circ_487	circ_487	NC_024313.1	+	3	558	8334818	8354685	multiexon
circ_86	circ_86	NC_024313.1	+	4	401	12795906	12798929	multiexon
circ_714	circ_714	NC_024313.1	+	3	244	9547036	9547448	multiexon
circ_77	circ_77	NC_024313.1	+	4	645	6744491	6753305	multiexon
circ_485	circ_485	NC_024313.1	+	5	915	7375209	7392277	multiexon
circ_80	circ_80	NC_024313.1	+	5	583	8889679	8895386	multiexon
circ_303	circ_303	NC_024313.1	+	1	393	10912548	10912940	Intron
circ_299	circ_299	NC_024313.1	+	2	688	8278104	8281362	multiexon
circ_486	circ_486	NC_024313.1	+	2	336	8299148	8305190	multiexon
circ_300	circ_300	NC_024313.1	+	4	596	8299148	8308498	multiexon
circ_966	circ_966	NC_024313.1	+	6	645	12063394	12071150	multiexon
circ_78	circ_78	NC_024313.1	+	6	1138	6853437	6884986	multiexon
circ_484	circ_484	NC_024313.1	+	2	300	6891741	6894321	multiexon
circ_481	circ_481	NC_024313.1	+	2	432	6327052	6328196	multiexon
circ_297	circ_297	NC_024313.1	+	4	385	102443	104918	multiexon
circ_965	circ_965	NC_024313.1	+	3	614	6327052	6331399	multiexon
circ_304	circ_304	NC_024313.1	+	3	684	12517803	12518769	multiexon
circ_84	circ_84	NC_024313.1	+	1	527	12398160	12398686	exon
circ_489	circ_489	NC_024313.1	+	2	200	9600996	9606138	multiexon
circ_82	circ_82	NC_024313.1	+	2	706	9437746	9442172	multiexon
circ_758	circ_758	NC_024313.1	+	2	995	8173672	8176500	multiexon
circ_89	circ_89	NC_024313.1	+	3	460	13523124	13523752	multiexon
circ_483	circ_483	NC_024313.1	+	4	778	6428076	6437753	multiexon
circ_490	circ_490	NC_024313.1	+	2	410	13084725	13085324	multiexon
circ_665	circ_665	NC_024313.1	+	4	343	9547036	9548741	multiexon
circ_1012	circ_1012	NC_024313.1	+	8	1216	1550314	1553107	multiexon
circ_85	circ_85	NC_024313.1	+	4	355	12569345	12576116	multiexon
circ_1042	circ_1042	NC_024313.1	+	4	762	13521172	13522783	multiexon
circ_1013	circ_1013	NC_024313.1	+	6	534	12710440	12713983	multiexon
circ_298	circ_298	NC_024313.1	+	3	501	6744491	6747391	multiexon
circ_733	circ_733	NC_024314.1	+	1	397	14970001	14970397	exon
circ_863	circ_863	NC_024314.1	+	4	487	15985581	15992926	multiexon
circ_147	circ_147	NC_024314.1	+	2	279	2283264	2283989	multiexon
circ_158	circ_158	NC_024314.1	+	3	388	22053406	22061364	multiexon
circ_683	circ_683	NC_024314.1	+	3	582	3140392	3144318	multiexon
circ_151	circ_151	NC_024314.1	+	3	395	9522326	9530699	multiexon
circ_149	circ_149	NC_024314.1	+	1	647	5678698	5679344	exon
circ_810	circ_810	NC_024314.1	+	2	252	3112898	3114824	multiexon
circ_365	circ_365	NC_024314.1	+	1	379	12958741	12959119	exon
circ_686	circ_686	NC_024314.1	+	4	783	15256245	15258515	multiexon
circ_359	circ_359	NC_024314.1	+	5	575	9517832	9530699	multiexon
circ_150	circ_150	NC_024314.1	+	3	415	6554258	6567891	multiexon
circ_734	circ_734	NC_024314.1	+	1	522	21245259	21245780	exon
circ_159	circ_159	NC_024314.1	+	2	512	22661050	22668086	multiexon
circ_689	circ_689	NC_024314.1	+	3	211	21773385	21775313	multiexon
circ_684	circ_684	NC_024314.1	+	8	864	9983617	9988118	multiexon
circ_787	circ_787	NC_024314.1	+	3	312	4832768	4833887	multiexon
circ_984	circ_984	NC_024314.1	+	4	427	2244267	2283989	multiexon
circ_546	circ_546	NC_024314.1	+	6	580	14679014	14680232	multiexon
circ_688	circ_688	NC_024314.1	+	5	465	18642641	18643566	multiexon
circ_771	circ_771	NC_024314.1	+	3	495	2676949	2677803	multiexon
circ_812	circ_812	NC_024314.1	+	2	199	21758096	21759363	multiexon
circ_633	circ_633	NC_024314.1	+	3	484	20998793	21001638	multiexon
circ_632	circ_632	NC_024314.1	+	3	421	12997869	12999756	multiexon
circ_862	circ_862	NC_024314.1	+	1	230	13684207	13684436	exon
circ_152	circ_152	NC_024314.1	+	6	1900	11855819	11872291	multiexon
circ_363	circ_363	NC_024314.1	+	10	1622	11923943	11938459	multiexon
circ_687	circ_687	NC_024314.1	+	5	441	18506377	18507185	multiexon
circ_364	circ_364	NC_024314.1	+	3	1192	11960497	11965347	multiexon
circ_983	circ_983	NC_024314.1	+	3	453	2071232	2103714	multiexon
circ_156	circ_156	NC_024314.1	+	3	329	15957645	15975396	multiexon
circ_369	circ_369	NC_024314.1	+	3	383	21861636	21862649	multiexon
circ_985	circ_985	NC_024314.1	+	3	843	5630461	5679344	multiexon
circ_360	circ_360	NC_024314.1	+	3	303	11408935	11412973	multiexon
circ_371	circ_371	NC_024314.1	+	3	905	23012404	23017129	multiexon
circ_154	circ_154	NC_024314.1	+	4	510	13811593	13814252	multiexon
circ_361	circ_361	NC_024314.1	+	5	1802	11866634	11872291	multiexon
circ_1022	circ_1022	NC_024314.1	+	3	377	448639	450916	multiexon
circ_927	circ_927	NC_024314.1	+	2	1456	14700887	14718036	multiexon
circ_811	circ_811	NC_024314.1	+	7	935	13600799	13603093	multiexon
circ_551	circ_551	NC_024314.1	+	4	461	28888333	28893423	multiexon
circ_1072	circ_1072	NC_024314.1	+	8	564	29767931	29772362	multiexon
circ_358	circ_358	NC_024314.1	+	4	517	7678515	7684999	multiexon
circ_772	circ_772	NC_024314.1	+	4	567	3166723	3168228	multiexon
circ_987	circ_987	NC_024314.1	+	9	996	25435778	25448532	multiexon
circ_864	circ_864	NC_024314.1	+	2	528	17134423	17141628	multiexon
circ_370	circ_370	NC_024314.1	+	9	1068	21895899	21911600	multiexon
circ_544	circ_544	NC_024314.1	+	1	540	5594657	5595196	exonintron
circ_160	circ_160	NC_024314.1	+	3	330	29271237	29271764	multiexon
circ_861	circ_861	NC_024314.1	+	2	291	5742005	5748963	multiexon
circ_1052	circ_1052	NC_024314.1	+	3	381	29047915	29048497	multiexon
circ_367	circ_367	NC_024314.1	+	4	531	19266133	19271210	multiexon
circ_368	circ_368	NC_024314.1	+	8	883	21636100	21655012	multiexon
circ_860	circ_860	NC_024314.1	+	2	282	2071232	2073402	multiexon
circ_155	circ_155	NC_024314.1	+	1	1351	14716686	14718036	exon
circ_926	circ_926	NC_024314.1	+	2	310	13659364	13659756	multiexon
circ_630	circ_630	NC_024314.1	+	2	438	7668447	7678576	multiexon
circ_988	circ_988	NC_024314.1	+	2	387	29893113	29893582	multiexon
circ_545	circ_545	NC_024314.1	+	2	1672	12227089	12229132	multiexon
circ_148	circ_148	NC_024314.1	+	3	1716	2785877	2795316	multiexon
circ_685	circ_685	NC_024314.1	+	1	480	14283171	14283650	exon
circ_550	circ_550	NC_024314.1	+	2	860	23998939	24001344	multiexon
circ_788	circ_788	NC_024314.1	+	4	408	18302527	18305490	multiexon
circ_372	circ_372	NC_024314.1	+	3	337	25880508	25881474	multiexon
circ_366	circ_366	NC_024314.1	+	7	870	14087354	14089669	multiexon
circ_357	circ_357	NC_024314.1	+	2	770	5656301	5679344	multiexon
circ_549	circ_549	NC_024314.1	+	3	385	21853203	21854341	multiexon
circ_548	circ_548	NC_024314.1	+	5	685	15069815	15073898	multiexon
circ_631	circ_631	NC_024314.1	+	7	636	10103688	10106604	multiexon
circ_636	circ_636	NC_024314.1	+	5	527	29603004	29605261	multiexon
circ_634	circ_634	NC_024314.1	+	3	264	22722564	22732362	multiexon
circ_153	circ_153	NC_024314.1	+	4	609	11881161	11883979	multiexon
circ_732	circ_732	NC_024314.1	+	3	329	4684780	4688468	multiexon
circ_362	circ_362	NC_024314.1	+	7	1100	11923943	11931505	multiexon
circ_547	circ_547	NC_024314.1	+	3	355	15069815	15071914	multiexon
circ_157	circ_157	NC_024314.1	+	3	428	20917378	20923647	multiexon
circ_635	circ_635	NC_024314.1	+	4	425	25867803	25870180	multiexon
circ_986	circ_986	NC_024314.1	+	1	189	22010355	22010543	exon
circ_177	circ_177	NC_024320.1	-	2	335	9012518	9012961	exonintron
circ_1077	circ_1077	NC_024320.1	+	3	545	20261517	20268416	multiexon
circ_391	circ_391	NC_024320.1	+	2	339	10988336	11011375	multiexon
circ_181	circ_181	NC_024320.1	+	2	282	16935828	16941332	multiexon
circ_396	circ_396	NC_024320.1	+	3	508	18360544	18362334	multiexon
circ_184	circ_184	NC_024320.1	+	5	475	19101549	19105545	multiexon
circ_182	circ_182	NC_024320.1	+	2	378	17005837	17006360	multiexon
circ_570	circ_570	NC_024320.1	+	13	2039	19549460	19611539	multiexon
circ_564	circ_564	NC_024320.1	+	7	523	4906635	4922110	multiexon
circ_176	circ_176	NC_024320.1	+	3	278	1484829	1486668	Intron
circ_642	circ_642	NC_024320.1	+	2	404	12122721	12123970	multiexon
circ_1076	circ_1076	NC_024320.1	+	3	552	18349192	18352788	multiexon
circ_640	circ_640	NC_024320.1	+	6	441	11614134	11616246	multiexon
circ_572	circ_572	NC_024320.1	+	4	812	22980095	22983444	multiexon
circ_183	circ_183	NC_024320.1	+	3	490	17005837	17014660	multiexon
circ_696	circ_696	NC_024320.1	+	4	329	4906635	4911274	multiexon
circ_991	circ_991	NC_024320.1	+	5	974	20801714	20805777	Intron
circ_565	circ_565	NC_024320.1	+	2	368	5988344	5988786	multiexon
circ_190	circ_190	NC_024320.1	+	3	514	22968329	22971798	multiexon
circ_1026	circ_1026	NC_024320.1	+	6	708	19664545	19665935	multiexon
circ_878	circ_878	NC_024320.1	+	5	627	10430248	10433250	multiexon
circ_741	circ_741	NC_024320.1	+	2	276	20163289	20164121	Intron
circ_739	circ_739	NC_024320.1	+	8	964	11521231	11524137	multiexon
circ_698	circ_698	NC_024320.1	+	3	620	15801849	15802692	multiexon
circ_645	circ_645	NC_024320.1	+	5	657	20163289	20169057	Intron
circ_643	circ_643	NC_024320.1	+	24	2880	15716820	15722730	multiexon
circ_740	circ_740	NC_024320.1	+	2	303	17460680	17462879	multiexon
circ_697	circ_697	NC_024320.1	+	5	751	11573620	11578118	multiexon
circ_990	circ_990	NC_024320.1	+	18	2792	5725419	5730470	multiexon
circ_644	circ_644	NC_024320.1	+	6	596	18230078	18235929	multiexon
circ_569	circ_569	NC_024320.1	+	5	835	17229363	17237202	multiexon
circ_792	circ_792	NC_024320.1	+	7	1390	21163366	21170318	Intron
circ_568	circ_568	NC_024320.1	+	4	713	17113401	17117305	multiexon
circ_881	circ_881	NC_024320.1	+	3	418	24711418	24714727	multiexon
circ_185	circ_185	NC_024320.1	+	3	455	19549460	19570084	multiexon
circ_879	circ_879	NC_024320.1	+	4	781	15801849	15806927	multiexon
circ_647	circ_647	NC_024320.1	+	2	383	27673750	27674227	multiexon
circ_180	circ_180	NC_024320.1	+	2	341	14548011	14548438	multiexon
circ_393	circ_393	NC_024320.1	+	8	974	13071323	13085161	multiexon
circ_880	circ_880	NC_024320.1	+	3	468	20163289	20166555	Intron
circ_567	circ_567	NC_024320.1	+	4	670	13008730	13020828	multiexon
circ_1027	circ_1027	NC_024320.1	+	2	297	25317249	25319409	multiexon
circ_398	circ_398	NC_024320.1	+	4	755	24695386	24696992	multiexon
circ_392	circ_392	NC_024320.1	+	2	422	13008730	13013441	multiexon
circ_775	circ_775	NC_024320.1	+	17	2630	17418550	17458535	multiexon
circ_186	circ_186	NC_024320.1	+	2	343	19584922	19586246	multiexon
circ_188	circ_188	NC_024320.1	+	3	321	20147539	20151975	multiexon
circ_641	circ_641	NC_024320.1	+	3	473	12120835	12123970	multiexon
circ_397	circ_397	NC_024320.1	+	5	489	20147539	20159900	multiexon
circ_390	circ_390	NC_024320.1	+	3	322	10430248	10431338	multiexon
circ_189	circ_189	NC_024320.1	+	2	338	20601752	20605844	Intron
circ_774	circ_774	NC_024320.1	+	1	693	1505610	1506302	Intron
circ_566	circ_566	NC_024320.1	+	6	611	8116887	8119732	multiexon
circ_187	circ_187	NC_024320.1	+	2	301	19655478	19656774	multiexon
circ_1025	circ_1025	NC_024320.1	+	2	246	17237052	17240707	multiexon
circ_699	circ_699	NC_024320.1	+	3	630	17229363	17232952	multiexon
circ_646	circ_646	NC_024320.1	+	3	267	26993428	26993867	multiexon
circ_178	circ_178	NC_024320.1	+	2	655	13061266	13064499	multiexon
circ_700	circ_700	NC_024320.1	+	2	337	25249455	25250801	multiexon
circ_394	circ_394	NC_024320.1	+	23	2461	13279494	13289240	multiexon
circ_571	circ_571	NC_024320.1	+	5	857	19598344	19611539	multiexon
circ_179	circ_179	NC_024320.1	+	3	621	14534798	14548438	multiexon
circ_573	circ_573	NC_024320.1	+	2	169	24641380	24645754	multiexon
circ_395	circ_395	NC_024320.1	+	3	469	16446958	16448446	multiexon
circ_347	circ_347	NW_007585128.1	+	5	502	117079	117923	multiexon
circ_626	circ_626	NW_007585128.1	+	4	1093	146535	147905	multiexon
circ_413	circ_413	NC_024322.1	-	3	331	16629390	16632685	Intergenic
circ_888	circ_888	NC_024322.1	-	2	204	16629390	16631360	Intergenic
circ_654	circ_654	NC_024322.1	+	1	381	9482163	9482543	exon
circ_592	circ_592	NC_024322.1	+	3	399	18228599	18229863	multiexon
circ_227	circ_227	NC_024322.1	+	1	296	15378513	15378808	exon
circ_221	circ_221	NC_024322.1	+	3	375	3129601	3133841	multiexon
circ_817	circ_817	NC_024322.1	+	2	828	9518476	9523217	multiexon
circ_889	circ_889	NC_024322.1	+	2	263	18595968	18598443	multiexon
circ_776	circ_776	NC_024322.1	+	4	272	13537086	13540413	multiexon
circ_588	circ_588	NC_024322.1	+	2	338	393780	394370	multiexon
circ_220	circ_220	NC_024322.1	+	5	1492	3116553	3133841	multiexon
circ_223	circ_223	NC_024322.1	+	7	1021	4535011	4548749	Intron
circ_224	circ_224	NC_024322.1	+	1	652	7494007	7494658	exon
circ_1033	circ_1033	NC_024322.1	+	3	429	5776907	5777814	multiexon
circ_994	circ_994	NC_024322.1	+	6	1762	3090609	3133841	multiexon
circ_816	circ_816	NC_024322.1	+	2	309	3225463	3226842	multiexon
circ_590	circ_590	NC_024322.1	+	3	376	6964627	6965852	multiexon
circ_226	circ_226	NC_024322.1	+	2	492	14478919	14481854	multiexon
circ_995	circ_995	NC_024322.1	+	6	831	6021985	6025957	multiexon
circ_225	circ_225	NC_024322.1	+	2	776	7494007	7504116	multiexon
circ_222	circ_222	NC_024322.1	+	2	338	4458052	4459734	Intron
circ_936	circ_936	NC_024322.1	+	3	709	18098531	18104869	multiexon
circ_412	circ_412	NC_024322.1	+	3	355	7542444	7548636	multiexon
circ_996	circ_996	NC_024322.1	+	1	2309	14589599	14591907	exon
circ_1080	circ_1080	NC_024322.1	+	17	2044	18608269	18631144	multiexon
circ_703	circ_703	NC_024322.1	+	12	1794	11340349	11357304	multiexon
circ_935	circ_935	NC_024322.1	+	5	649	14619621	14622221	multiexon
circ_414	circ_414	NC_024322.1	+	2	348	18080179	18081385	multiexon
circ_655	circ_655	NC_024322.1	+	7	1968	15978787	15981315	multiexon
circ_589	circ_589	NC_024322.1	+	6	963	4547012	4548749	Intron
circ_591	circ_591	NC_024322.1	+	4	662	6964627	6974429	multiexon
circ_1079	circ_1079	NC_024322.1	+	6	655	16300824	16302816	multiexon
circ_1078	circ_1078	NC_024322.1	+	4	504	6028759	6031646	multiexon
circ_219	circ_219	NC_024322.1	+	2	1117	3116553	3117763	multiexon
circ_653	circ_653	NC_024322.1	+	2	499	8447427	8449527	multiexon
circ_1045	circ_1045	NC_024326.1	+	3	347	886304	886828	multiexon
circ_977	circ_977	NC_024326.1	+	3	564	12620516	12622605	multiexon
circ_848	circ_848	NC_024326.1	+	2	236	8386475	8387259	multiexon
circ_516	circ_516	NC_024326.1	+	2	280	11540532	11541574	multiexon
circ_850	circ_850	NC_024326.1	+	3	364	13677305	13678091	multiexon
circ_765	circ_765	NC_024326.1	+	2	308	13340708	13342042	multiexon
circ_978	circ_978	NC_024326.1	+	2	177	13672513	13673649	multiexon
circ_846	circ_846	NC_024326.1	+	2	291	1714003	1716041	multiexon
circ_115	circ_115	NC_024326.1	+	2	294	12574408	12576575	multiexon
circ_335	circ_335	NC_024326.1	+	3	550	12521072	12522945	multiexon
circ_622	circ_622	NC_024326.1	+	4	346	13395690	13404125	multiexon
circ_330	circ_330	NC_024326.1	+	4	442	882986	886828	multiexon
circ_514	circ_514	NC_024326.1	+	2	738	537606	541722	multiexon
circ_517	circ_517	NC_024326.1	+	4	716	12628601	12636864	multiexon
circ_918	circ_918	NC_024326.1	+	2	341	13230244	13232477	multiexon
circ_1046	circ_1046	NC_024326.1	+	5	652	8386475	8422834	multiexon
circ_333	circ_333	NC_024326.1	+	2	411	5570074	5572131	multiexon
circ_917	circ_917	NC_024326.1	+	8	827	5501523	5517377	multiexon
circ_621	circ_621	NC_024326.1	+	2	258	7947055	7954496	multiexon
circ_674	circ_674	NC_024326.1	+	3	536	10347991	10351892	multiexon
circ_673	circ_673	NC_024326.1	+	5	387	7573332	7575015	Intron
circ_518	circ_518	NC_024326.1	+	1	1141	13555013	13556153	exon
circ_726	circ_726	NC_024326.1	+	7	513	7573332	7575995	Intron
circ_331	circ_331	NC_024326.1	+	5	429	4838341	4842882	multiexon
circ_1015	circ_1015	NC_024326.1	+	4	656	1751407	1753816	multiexon
circ_515	circ_515	NC_024326.1	+	4	361	1803906	1807351	multiexon
circ_676	circ_676	NC_024326.1	+	4	374	14766872	14767601	multiexon
circ_1068	circ_1068	NC_024326.1	+	1	843	8365080	8365922	exon
circ_113	circ_113	NC_024326.1	+	2	255	7947058	7954496	multiexon
circ_847	circ_847	NC_024326.1	+	3	390	4970120	4973313	multiexon
circ_620	circ_620	NC_024326.1	+	8	606	7573332	7576641	Intron
circ_1016	circ_1016	NC_024326.1	+	7	1280	12620516	12636864	multiexon
circ_111	circ_111	NC_024326.1	+	3	664	1611194	1612885	multiexon
circ_675	circ_675	NC_024326.1	+	3	343	11295350	11296712	multiexon
circ_976	circ_976	NC_024326.1	+	2	841	5501036	5505126	multiexon
circ_623	circ_623	NC_024326.1	+	7	1493	14559918	14563617	multiexon
circ_764	circ_764	NC_024326.1	+	14	993	5283960	5287508	multiexon
circ_1069	circ_1069	NC_024326.1	+	6	985	12620516	12631073	multiexon
circ_332	circ_332	NC_024326.1	+	2	394	5457751	5459224	multiexon
circ_724	circ_724	NC_024326.1	+	1	267	7572001	7572267	exon
circ_112	circ_112	NC_024326.1	+	6	473	5513505	5517377	multiexon
circ_725	circ_725	NC_024326.1	+	3	255	7573332	7574163	Intron
circ_336	circ_336	NC_024326.1	+	2	605	13129786	13133439	multiexon
circ_334	circ_334	NC_024326.1	+	4	732	12510101	12522945	multiexon
circ_915	circ_915	NC_024326.1	+	9	824	872730	886828	multiexon
circ_916	circ_916	NC_024326.1	+	3	487	4806539	4809142	multiexon
circ_849	circ_849	NC_024326.1	+	3	421	12628601	12631073	multiexon
circ_114	circ_114	NC_024326.1	+	2	374	11586745	11592471	multiexon
circ_768	circ_768	NC_024318.1	+	3	307	1949797	1953035	multiexon
circ_142	circ_142	NC_024318.1	+	3	486	8086068	8087960	multiexon
circ_140	circ_140	NC_024318.1	+	4	475	8065806	8073833	multiexon
circ_1071	circ_1071	NC_024318.1	+	4	510	4618506	4626212	multiexon
circ_925	circ_925	NC_024318.1	+	2	284	8044743	8048013	multiexon
circ_770	circ_770	NC_024318.1	+	3	389	17067946	17068843	multiexon
circ_135	circ_135	NC_024318.1	+	1	341	6801256	6801596	exon
circ_351	circ_351	NC_024318.1	+	3	988	7887438	7896058	multiexon
circ_146	circ_146	NC_024318.1	+	3	393	14213544	14215557	multiexon
circ_627	circ_627	NC_024318.1	+	3	374	632509	633241	Intron
circ_729	circ_729	NC_024318.1	+	4	690	5404034	5404987	multiexon
circ_139	circ_139	NC_024318.1	+	5	990	7908387	7913092	multiexon
circ_856	circ_856	NC_024318.1	+	3	483	379299	383732	multiexon
circ_352	circ_352	NC_024318.1	+	2	144	10040507	10042145	multiexon
circ_138	circ_138	NC_024318.1	+	11	2391	7887438	7945584	multiexon
circ_1050	circ_1050	NC_024318.1	+	3	259	15093330	15115900	multiexon
circ_535	circ_535	NC_024318.1	+	4	577	632509	634704	Intron
circ_137	circ_137	NC_024318.1	+	10	2209	7887438	7913092	multiexon
circ_858	circ_858	NC_024318.1	+	1	297	14171613	14171909	exon
circ_541	circ_541	NC_024318.1	+	8	864	16513649	16516648	multiexon
circ_807	circ_807	NC_024318.1	+	3	381	1921782	1923255	multiexon
circ_1051	circ_1051	NC_024318.1	+	2	314	17245841	17246830	multiexon
circ_859	circ_859	NC_024318.1	+	2	281	15432185	15454627	multiexon
circ_534	circ_534	NC_024318.1	+	3	1883	175056	178915	multiexon
circ_141	circ_141	NC_024318.1	+	4	586	8073734	8087960	multiexon
circ_1049	circ_1049	NC_024318.1	+	3	382	12149923	12173069	multiexon
circ_349	circ_349	NC_024318.1	+	3	972	1278116	1280772	multiexon
circ_144	circ_144	NC_024318.1	+	3	261	12371304	12372248	multiexon
circ_981	circ_981	NC_024318.1	+	4	661	7977817	8008084	multiexon
circ_730	circ_730	NC_024318.1	+	3	391	16874229	16874864	multiexon
circ_536	circ_536	NC_024318.1	+	5	687	7635702	7637164	multiexon
circ_982	circ_982	NC_024318.1	+	7	598	15454514	15502930	multiexon
circ_731	circ_731	NC_024318.1	+	2	404	16879322	16880747	multiexon
circ_1021	circ_1021	NC_024318.1	+	3	244	12369415	12369830	multiexon
circ_1020	circ_1020	NC_024318.1	+	2	355	4339026	4340285	multiexon
circ_134	circ_134	NC_024318.1	+	2	491	4585977	4595568	multiexon
circ_540	circ_540	NC_024318.1	+	9	990	16392567	16395491	multiexon
circ_136	circ_136	NC_024318.1	+	2	604	7887438	7890585	multiexon
circ_145	circ_145	NC_024318.1	+	3	368	14213544	14215532	multiexon
circ_350	circ_350	NC_024318.1	+	2	452	6801256	6824625	multiexon
circ_857	circ_857	NC_024318.1	+	2	333	13205186	13205739	multiexon
circ_629	circ_629	NC_024318.1	+	2	435	6987785	6990225	multiexon
circ_539	circ_539	NC_024318.1	+	2	323	16323434	16324738	multiexon
circ_682	circ_682	NC_024318.1	+	2	406	14211359	14213323	multiexon
circ_353	circ_353	NC_024318.1	+	4	380	10075171	10078554	multiexon
circ_628	circ_628	NC_024318.1	+	2	305	4413956	4415050	multiexon
circ_143	circ_143	NC_024318.1	+	3	334	8554380	8591503	multiexon
circ_1048	circ_1048	NC_024318.1	+	2	274	11521249	11526271	Intron
circ_809	circ_809	NC_024318.1	+	3	329	13693142	13696321	multiexon
circ_348	circ_348	NC_024318.1	+	5	569	918940	920243	multiexon
circ_354	circ_354	NC_024318.1	+	4	395	10255819	10258937	multiexon
circ_538	circ_538	NC_024318.1	+	2	218	11012996	11013292	multiexon
circ_543	circ_543	NC_024318.1	+	5	474	18366380	18367854	multiexon
circ_537	circ_537	NC_024318.1	+	4	1447	7820889	7837802	multiexon
circ_786	circ_786	NC_024318.1	+	4	544	10196702	10199292	multiexon
circ_542	circ_542	NC_024318.1	+	2	308	18257581	18258834	multiexon
circ_1019	circ_1019	NC_024318.1	+	2	956	177439	178915	multiexon
circ_808	circ_808	NC_024318.1	+	3	262	12483719	12484423	multiexon
circ_356	circ_356	NC_024318.1	+	4	401	14986544	14989769	multiexon
circ_355	circ_355	NC_024318.1	+	6	993	12616355	12620088	multiexon
circ_769	circ_769	NC_024318.1	+	4	429	5912230	5915083	multiexon
circ_777	circ_777	NW_007585384.1	+	2	339	1626	2358	multiexon
circ_742	circ_742	NW_007585115.1	+	3	363	204032	206044	multiexon
circ_218	circ_218	NW_007585115.1	+	3	589	267834	270087	multiexon
circ_745	circ_745	NC_024311.1	+	2	245	15631204	15631536	Intron
circ_597	circ_597	NC_024311.1	+	2	386	7556094	7557759	multiexon
circ_13	circ_13	NC_024311.1	+	3	3585	4698044	4703084	multiexon
circ_598	circ_598	NC_024311.1	+	2	356	11598455	11599300	multiexon
circ_16	circ_16	NC_024311.1	+	2	315	10948386	10955466	multiexon
circ_243	circ_243	NC_024311.1	+	7	1050	15494906	15507056	multiexon
circ_941	circ_941	NC_024311.1	+	3	413	11099868	11149967	multiexon
circ_433	circ_433	NC_024311.1	+	4	531	17023095	17027346	multiexon
circ_18	circ_18	NC_024311.1	+	6	896	16481909	16494062	multiexon
circ_894	circ_894	NC_024311.1	+	3	334	12501968	12504572	multiexon
circ_896	circ_896	NC_024311.1	+	9	1112	16434400	16494062	multiexon
circ_943	circ_943	NC_024311.1	+	11	1432	16434400	16532685	multiexon
circ_240	circ_240	NC_024311.1	+	2	1415	9150422	9152853	multiexon
circ_659	circ_659	NC_024311.1	+	4	501	15655959	15658395	Intron
circ_1058	circ_1058	NC_024311.1	+	4	515	15505047	15510294	multiexon
circ_893	circ_893	NC_024311.1	+	5	532	6533054	6536023	multiexon
circ_822	circ_822	NC_024311.1	+	3	353	243251	244418	multiexon
circ_794	circ_794	NC_024311.1	+	2	1346	17847543	17851857	multiexon
circ_20	circ_20	NC_024311.1	+	2	231	18379761	18380341	multiexon
circ_244	circ_244	NC_024311.1	+	3	478	17177013	17179175	multiexon
circ_245	circ_245	NC_024311.1	+	15	2265	18280829	18293844	multiexon
circ_12	circ_12	NC_024311.1	+	1	1695	834107	835801	exon
circ_778	circ_778	NC_024311.1	+	3	302	7542479	7544397	multiexon
circ_15	circ_15	NC_024311.1	+	5	628	7558170	7561322	multiexon
circ_19	circ_19	NC_024311.1	+	4	527	17610513	17614475	multiexon
circ_241	circ_241	NC_024311.1	+	3	510	12491559	12498334	multiexon
circ_1036	circ_1036	NC_024311.1	+	1	232	4725995	4726226	exon
circ_432	circ_432	NC_024311.1	+	3	440	16481909	16484190	multiexon
circ_430	circ_430	NC_024311.1	+	5	569	243251	245924	multiexon
circ_823	circ_823	NC_024311.1	+	2	286	11149056	11149967	multiexon
circ_942	circ_942	NC_024311.1	+	6	1053	12526879	12537030	multiexon
circ_431	circ_431	NC_024311.1	+	3	251	8309222	8310169	multiexon
circ_238	circ_238	NC_024311.1	+	2	1860	823676	835801	multiexon
circ_17	circ_17	NC_024311.1	+	3	357	12987636	12989569	multiexon
circ_895	circ_895	NC_024311.1	+	9	1195	15494906	15521879	multiexon
circ_239	circ_239	NC_024311.1	+	2	338	4761152	4761780	multiexon
circ_1059	circ_1059	NC_024311.1	+	8	1154	16470310	16521244	multiexon
circ_242	circ_242	NC_024311.1	+	6	883	12558048	12565119	multiexon
circ_824	circ_824	NC_024311.1	+	8	1128	15494906	15510294	multiexon
circ_14	circ_14	NC_024311.1	+	1	299	7510444	7510742	exon
circ_579	circ_579	NC_024316.1	-	2	284	17283817	17288537	exonintron
circ_1054	circ_1054	NC_024316.1	+	2	238	15166472	15168748	multiexon
circ_992	circ_992	NC_024316.1	+	3	276	17568656	17687292	multiexon
circ_651	circ_651	NC_024316.1	+	4	681	19660475	19662207	multiexon
circ_702	circ_702	NC_024316.1	+	4	847	19950433	19952744	multiexon
circ_884	circ_884	NC_024316.1	+	2	1530	20531388	20533208	multiexon
circ_195	circ_195	NC_024316.1	+	4	1904	20531388	20535702	multiexon
circ_194	circ_194	NC_024316.1	+	3	510	13627188	13629544	multiexon
circ_649	circ_649	NC_024316.1	+	3	1528	10112375	10121377	multiexon
circ_401	circ_401	NC_024316.1	+	2	606	9466454	9467364	multiexon
circ_196	circ_196	NC_024316.1	+	3	410	20892127	20892839	multiexon
circ_882	circ_882	NC_024316.1	+	4	506	14067931	14070880	multiexon
circ_403	circ_403	NC_024316.1	+	2	1508	15681542	15687514	multiexon
circ_932	circ_932	NC_024316.1	+	4	696	19613418	19614904	multiexon
circ_402	circ_402	NC_024316.1	+	4	420	9484364	9492166	multiexon
circ_1053	circ_1053	NC_024316.1	+	3	657	9194309	9200532	multiexon
circ_701	circ_701	NC_024316.1	+	2	432	9196518	9200532	multiexon
circ_399	circ_399	NC_024316.1	+	5	649	248176	249266	multiexon
circ_883	circ_883	NC_024316.1	+	2	278	16529789	16530323	multiexon
circ_577	circ_577	NC_024316.1	+	2	192	10759458	10759839	multiexon
circ_650	circ_650	NC_024316.1	+	6	699	16496118	16499774	multiexon
circ_400	circ_400	NC_024316.1	+	2	1091	2817445	2818627	multiexon
circ_575	circ_575	NC_024316.1	+	3	821	6480997	6483375	Intron
circ_648	circ_648	NC_024316.1	+	6	767	4768499	4770805	multiexon
circ_930	circ_930	NC_024316.1	+	1	356	3074229	3074584	exon
circ_578	circ_578	NC_024316.1	+	2	412	15808553	15810782	multiexon
circ_574	circ_574	NC_024316.1	+	1	768	4787775	4788542	exon
circ_931	circ_931	NC_024316.1	+	2	456	15221989	15224531	multiexon
circ_192	circ_192	NC_024316.1	+	2	361	1284274	1301709	multiexon
circ_576	circ_576	NC_024316.1	+	3	1105	10579668	10582394	multiexon
circ_193	circ_193	NC_024316.1	+	2	319	9380579	9380980	multiexon
circ_68	circ_68	NC_024315.1	-	2	449	3150898	3152333	exonintron
circ_610	circ_610	NC_024315.1	+	2	339	10687391	10694886	multiexon
circ_757	circ_757	NC_024315.1	+	3	612	19330529	19331390	multiexon
circ_478	circ_478	NC_024315.1	+	2	204	14206334	14215267	multiexon
circ_962	circ_962	NC_024315.1	+	4	658	345273	346993	multiexon
circ_479	circ_479	NC_024315.1	+	3	372	15097762	15098696	multiexon
circ_611	circ_611	NC_024315.1	+	3	328	18401220	18408348	multiexon
circ_476	circ_476	NC_024315.1	+	4	525	9192593	9194780	multiexon
circ_473	circ_473	NC_024315.1	+	4	608	1682031	1688757	multiexon
circ_292	circ_292	NC_024315.1	+	5	396	8710865	8749261	multiexon
circ_70	circ_70	NC_024315.1	+	2	415	9096126	9097432	multiexon
circ_755	circ_755	NC_024315.1	+	2	279	1674738	1676187	multiexon
circ_1009	circ_1009	NC_024315.1	+	7	697	10936596	10945761	multiexon
circ_838	circ_838	NC_024315.1	+	6	658	1644699	1674840	multiexon
circ_294	circ_294	NC_024315.1	+	2	192	10919596	10920941	multiexon
circ_964	circ_964	NC_024315.1	+	4	504	19599943	19605357	multiexon
circ_1011	circ_1011	NC_024315.1	+	4	579	17032177	17035295	multiexon
circ_73	circ_73	NC_024315.1	+	4	558	14266859	14272022	multiexon
circ_1040	circ_1040	NC_024315.1	+	1	236	10694651	10694886	exon
circ_296	circ_296	NC_024315.1	+	5	660	17031796	17035295	multiexon
circ_664	circ_664	NC_024315.1	+	1	351	10635682	10636032	exon
circ_472	circ_472	NC_024315.1	+	2	912	1183050	1184842	multiexon
circ_72	circ_72	NC_024315.1	+	3	402	10058092	10065065	multiexon
circ_963	circ_963	NC_024315.1	+	2	429	4633978	4634495	multiexon
circ_1010	circ_1010	NC_024315.1	+	2	241	13799213	13799991	multiexon
circ_475	circ_475	NC_024315.1	+	5	373	8710888	8749261	multiexon
circ_69	circ_69	NC_024315.1	+	1	304	3879962	3880265	exon
circ_290	circ_290	NC_024315.1	+	4	546	1644699	1662482	multiexon
circ_474	circ_474	NC_024315.1	+	1	657	5708254	5708910	exon
circ_71	circ_71	NC_024315.1	+	3	608	9096126	9100088	multiexon
circ_67	circ_67	NC_024315.1	+	3	401	2840493	2848513	multiexon
circ_663	circ_663	NC_024315.1	+	2	374	9200541	9202099	multiexon
circ_609	circ_609	NC_024315.1	+	6	899	9192593	9202099	multiexon
circ_710	circ_710	NC_024315.1	+	6	501	16215781	16218597	multiexon
circ_293	circ_293	NC_024315.1	+	3	451	10044141	10046814	multiexon
circ_477	circ_477	NC_024315.1	+	3	429	9788595	9792236	multiexon
circ_756	circ_756	NC_024315.1	+	11	957	12553765	12556299	multiexon
circ_711	circ_711	NC_024315.1	+	2	244	17411847	17414440	multiexon
circ_291	circ_291	NC_024315.1	+	3	487	1693079	1694866	multiexon
circ_712	circ_712	NC_024315.1	+	2	264	19599943	19600433	multiexon
circ_75	circ_75	NC_024315.1	+	1	532	16191959	16192490	exon
circ_480	circ_480	NC_024315.1	+	6	1175	17415979	17418813	multiexon
circ_1062	circ_1062	NC_024315.1	+	5	1008	616497	618059	multiexon
circ_74	circ_74	NC_024315.1	+	2	259	14378571	14385613	multiexon
circ_295	circ_295	NC_024315.1	+	4	326	14070626	14084513	multiexon
circ_66	circ_66	NC_024315.1	+	3	412	1644699	1646676	multiexon
circ_1063	circ_1063	NC_024315.1	+	3	280	1711195	1712730	multiexon
circ_950	circ_950	NC_024323.1	+	4	444	8659117	8664290	multiexon
circ_829	circ_829	NC_024323.1	+	5	561	4791496	4827006	multiexon
circ_269	circ_269	NC_024323.1	+	2	295	4791496	4794897	multiexon
circ_47	circ_47	NC_024323.1	+	3	306	12311460	12312825	multiexon
circ_709	circ_709	NC_024323.1	+	7	1036	15233601	15303019	multiexon
circ_45	circ_45	NC_024323.1	+	3	381	4791496	4807761	multiexon
circ_46	circ_46	NC_024323.1	+	3	444	8174131	8188058	multiexon
circ_708	circ_708	NC_024323.1	+	4	534	8174131	8200546	multiexon
circ_949	circ_949	NC_024323.1	+	3	268	7713515	7720103	Intron
circ_1004	circ_1004	NC_024323.1	+	4	445	4791496	4818000	multiexon
circ_796	circ_796	NC_024323.1	+	4	508	3798173	3799032	multiexon
circ_274	circ_274	NC_024323.1	+	5	763	10198460	10199978	multiexon
circ_903	circ_903	NC_024323.1	+	5	451	7713515	7726981	Intron
circ_902	circ_902	NC_024323.1	+	4	359	6998214	6998900	multiexon
circ_831	circ_831	NC_024323.1	+	11	1768	12706509	12726774	multiexon
circ_273	circ_273	NC_024323.1	+	3	528	8581902	8602658	multiexon
circ_49	circ_49	NC_024323.1	+	5	429	15292747	15300439	multiexon
circ_830	circ_830	NC_024323.1	+	4	556	6774960	6777925	multiexon
circ_951	circ_951	NC_024323.1	+	2	900	10989256	10990548	multiexon
circ_603	circ_603	NC_024323.1	+	4	483	12352403	12353450	multiexon
circ_270	circ_270	NC_024323.1	+	1	656	7022075	7022730	exon
circ_660	circ_660	NC_024323.1	+	2	285	1566426	1566805	multiexon
circ_266	circ_266	NC_024323.1	+	13	1604	3384213	3392995	multiexon
circ_781	circ_781	NC_024323.1	+	6	860	12959012	12960466	multiexon
circ_277	circ_277	NC_024323.1	+	2	360	13011356	13011823	multiexon
circ_51	circ_51	NC_024323.1	+	2	404	16398769	16399329	multiexon
circ_271	circ_271	NC_024323.1	+	3	446	8535152	8587788	multiexon
circ_1003	circ_1003	NC_024323.1	+	2	134	4085006	4085697	multiexon
circ_661	circ_661	NC_024323.1	+	3	359	14774403	14775655	multiexon
circ_276	circ_276	NC_024323.1	+	4	531	12853637	12855842	multiexon
circ_602	circ_602	NC_024323.1	+	4	757	434800	438714	multiexon
circ_272	circ_272	NC_024323.1	+	2	350	8581902	8587788	multiexon
circ_48	circ_48	NC_024323.1	+	5	859	12723649	12726774	multiexon
circ_275	circ_275	NC_024323.1	+	3	413	12706509	12709473	multiexon
circ_458	circ_458	NC_024323.1	+	1	532	15233601	15234132	exon
circ_268	circ_268	NC_024323.1	+	2	287	4184393	4184789	multiexon
circ_455	circ_455	NC_024323.1	+	1	555	3374305	3374859	exon
circ_457	circ_457	NC_024323.1	+	4	624	8535152	8602658	multiexon
circ_1038	circ_1038	NC_024323.1	+	3	233	8645524	8648427	multiexon
circ_278	circ_278	NC_024323.1	+	4	1642	16415198	16417571	multiexon
circ_456	circ_456	NC_024323.1	+	6	610	4791496	4845473	multiexon
circ_267	circ_267	NC_024323.1	+	4	425	3403760	3405405	multiexon
circ_50	circ_50	NC_024323.1	+	6	504	15292747	15303019	multiexon
circ_454	circ_454	NC_024323.1	+	2	331	2531754	2536535	multiexon
circ_29	circ_29	NC_024327.1	+	2	308	4506798	4508253	multiexon
circ_445	circ_445	NC_024327.1	+	9	1782	4919133	4924853	multiexon
circ_1001	circ_1001	NC_024327.1	+	3	570	4919133	4919895	multiexon
circ_446	circ_446	NC_024327.1	+	3	502	6900379	6903019	multiexon
circ_447	circ_447	NC_024327.1	+	3	374	10699334	10702690	Intron
circ_255	circ_255	NC_024327.1	+	5	701	9585660	9590824	multiexon
circ_256	circ_256	NC_024327.1	+	3	393	9904553	9907354	multiexon
circ_444	circ_444	NC_024327.1	+	2	217	3181893	3182398	multiexon
circ_21	circ_21	NW_007585129.1	+	2	248	67326	67986	multiexon
circ_442	circ_442	NW_007585109.1	+	3	248	173905	175587	multiexon
circ_706	circ_706	NW_007585109.1	+	2	266	196348	197630	multiexon
circ_443	circ_443	NW_007585109.1	+	5	595	187981	192844	multiexon
circ_780	circ_780	NW_007585109.1	+	7	861	187981	197630	multiexon
circ_471	circ_471	NW_007585154.1	+	4	569	32751	35441	multiexon
circ_59	circ_59	NC_024307.1	-	3	435	20555930	20557671	Intergenic
circ_604	circ_604	NC_024307.1	+	2	336	3812856	3813456	multiexon
circ_470	circ_470	NC_024307.1	+	3	648	23656007	23660251	multiexon
circ_1006	circ_1006	NC_024307.1	+	8	924	10598817	10605249	multiexon
circ_960	circ_960	NC_024307.1	+	10	1265	28153664	28165064	multiexon
circ_54	circ_54	NC_024307.1	+	8	1205	5804381	5818990	multiexon
circ_952	circ_952	NC_024307.1	+	7	1264	2020327	2022555	multiexon
circ_607	circ_607	NC_024307.1	+	2	1763	13036965	13038917	multiexon
circ_53	circ_53	NC_024307.1	+	7	1151	1286794	1302335	multiexon
circ_56	circ_56	NC_024307.1	+	3	483	19133984	19137702	multiexon
circ_467	circ_467	NC_024307.1	+	10	1922	20151994	20160593	multiexon
circ_287	circ_287	NC_024307.1	+	2	703	27676310	27677517	multiexon
circ_799	circ_799	NC_024307.1	+	7	884	28099774	28104531	multiexon
circ_461	circ_461	NC_024307.1	+	4	809	5898303	5915157	multiexon
circ_957	circ_957	NC_024307.1	+	2	207	17884220	17889877	exonintron
circ_289	circ_289	NC_024307.1	+	3	488	33262731	33284748	multiexon
circ_904	circ_904	NC_024307.1	+	5	858	6146368	6159940	multiexon
circ_1007	circ_1007	NC_024307.1	+	2	347	17379835	17394124	multiexon
circ_55	circ_55	NC_024307.1	+	2	393	17287686	17294223	multiexon
circ_605	circ_605	NC_024307.1	+	6	513	5139014	5140447	multiexon
circ_468	circ_468	NC_024307.1	+	3	305	22014058	22015861	multiexon
circ_466	circ_466	NC_024307.1	+	4	633	17287686	17304948	multiexon
circ_65	circ_65	NC_024307.1	+	2	399	32846043	32846799	multiexon
circ_1061	circ_1061	NC_024307.1	+	4	476	5148802	5149881	multiexon
circ_52	circ_52	NC_024307.1	+	2	290	1033834	1035821	multiexon
circ_953	circ_953	NC_024307.1	+	4	783	6146368	6152886	multiexon
circ_832	circ_832	NC_024307.1	+	2	4096	17167993	17174493	multiexon
circ_62	circ_62	NC_024307.1	+	3	307	24725936	24740261	multiexon
circ_281	circ_281	NC_024307.1	+	2	462	14847108	14847962	multiexon
circ_63	circ_63	NC_024307.1	+	2	433	26919435	26921768	multiexon
circ_462	circ_462	NC_024307.1	+	4	678	10631133	10660538	multiexon
circ_282	circ_282	NC_024307.1	+	2	264	17239940	17241365	multiexon
circ_60	circ_60	NC_024307.1	+	3	430	22969575	22974235	multiexon
circ_608	circ_608	NC_024307.1	+	7	1164	22062636	22065696	multiexon
circ_459	circ_459	NC_024307.1	+	1	169	1113429	1113597	exon
circ_905	circ_905	NC_024307.1	+	4	553	13941435	13943864	multiexon
circ_906	circ_906	NC_024307.1	+	2	290	15085740	15086127	multiexon
circ_280	circ_280	NC_024307.1	+	4	1141	6808842	6810509	multiexon
circ_836	circ_836	NC_024307.1	+	9	1312	32839677	32852382	multiexon
circ_464	circ_464	NC_024307.1	+	3	363	16116427	16118610	multiexon
circ_662	circ_662	NC_024307.1	+	5	1484	6808842	6813381	multiexon
circ_835	circ_835	NC_024307.1	+	8	1041	28160557	28165064	multiexon
circ_907	circ_907	NC_024307.1	+	3	450	23761693	23762348	multiexon
circ_283	circ_283	NC_024307.1	+	4	454	20924456	20929963	multiexon
circ_954	circ_954	NC_024307.1	+	1	1739	7388748	7390486	exon
circ_284	circ_284	NC_024307.1	+	3	302	20940236	20941862	multiexon
circ_797	circ_797	NC_024307.1	+	5	360	1280058	1287931	multiexon
circ_286	circ_286	NC_024307.1	+	2	357	23659786	23660251	multiexon
circ_833	circ_833	NC_024307.1	+	5	401	25825454	25837926	multiexon
circ_753	circ_753	NC_024307.1	+	3	486	5463566	5465551	multiexon
circ_64	circ_64	NC_024307.1	+	3	477	28160557	28161679	multiexon
circ_61	circ_61	NC_024307.1	+	13	1462	23901872	23914484	multiexon
circ_463	circ_463	NC_024307.1	+	3	455	10652494	10660538	multiexon
circ_460	circ_460	NC_024307.1	+	7	548	5811668	5818990	multiexon
circ_798	circ_798	NC_024307.1	+	3	226	1496675	1497101	multiexon
circ_834	circ_834	NC_024307.1	+	3	503	27235864	27236718	multiexon
circ_837	circ_837	NC_024307.1	+	12	2529	33262731	33341159	multiexon
circ_1039	circ_1039	NC_024307.1	+	2	194	13994840	13997020	multiexon
circ_285	circ_285	NC_024307.1	+	2	583	23271476	23272374	multiexon
circ_754	circ_754	NC_024307.1	+	2	277	10555714	10556873	multiexon
circ_1008	circ_1008	NC_024307.1	+	1	245	17393880	17394124	exon
circ_288	circ_288	NC_024307.1	+	4	254	27831040	27838344	multiexon
circ_465	circ_465	NC_024307.1	+	4	516	17239940	17270875	multiexon
circ_955	circ_955	NC_024307.1	+	12	2523	17213995	17241365	multiexon
circ_908	circ_908	NC_024307.1	+	3	693	33317989	33321771	multiexon
circ_958	circ_958	NC_024307.1	+	7	677	20900396	20918367	multiexon
circ_58	circ_58	NC_024307.1	+	2	373	20184297	20185906	multiexon
circ_800	circ_800	NC_024307.1	+	1	529	31237061	31237589	exon
circ_959	circ_959	NC_024307.1	+	5	502	26795346	26796431	multiexon
circ_1005	circ_1005	NC_024307.1	+	3	370	7496794	7500183	multiexon
circ_752	circ_752	NC_024307.1	+	7	597	5139014	5141688	multiexon
circ_279	circ_279	NC_024307.1	+	2	273	5914312	5915157	multiexon
circ_961	circ_961	NC_024307.1	+	7	1068	34402997	34405573	multiexon
circ_956	circ_956	NC_024307.1	+	2	328	17393880	17414610	multiexon
circ_57	circ_57	NC_024307.1	+	5	1176	20151994	20154643	multiexon
circ_606	circ_606	NC_024307.1	+	2	350	7538364	7539089	Intron
circ_469	circ_469	NC_024307.1	+	6	707	22969575	22982559	multiexon
circ_246	circ_246	NW_007585112.1	+	6	872	441051	450013	multiexon
