# Supplementary material for: ceRNA crosstalk mediated by ncRNAs is a novel regulatory mechanism in fish sex determination and differentiation
Source: HighWire-hosted journal article supplement (doi:10.1101/gr.275962.121), 2022-08-01
Supplement: Supplemental_Table_S6.xlsx [file Supplemental_Table_S6.xlsx]

## Sheet: Supplementary Table S6
Table S6. 48 Sex-related genes in tongue sole.
GeneID	Symbol	Gene_full_name
103376633	amh	anti-Mullerian hormone
103386397	amhr2	anti-Mullerian hormone receptor, type II
103376977	arx	aristaless related homeobox a
103392533	cbx2	chromobox homolog 2
103396460	insra	insulin receptor a
103393515	insra-like	insulin receptor-like
103388302	ctnnb1	catenin (cadherin-associated protein), beta 1
103396234	cxcr4a	C-X-C chemokine receptor type 4-like
103378914	cyp19a1a	aromatase-like
103380488	cyp19a1b	aromatase
103394245	daz1	deleted in azoospermia-like
103385071	dhh	desert hedgehog signaling molecule
103383519	dkk2	dickkopf WNT signaling pathway inhibitor 2
103397807	dmrt1	doublesex and mab-3 related transcription factor 1
103397809	dmrt2a	doublesex and mab-3 related transcription factor 2a
103397808	dmrt3a	doublesex and mab-3 related transcription factor 3a
103384120	fgf20	fibroblast growth factor 20
103397268	figla	folliculogenesis specific bHLH transcription factor
103378228	foxl2a	forkhead box L2a
103397739	fsta	follistatin a
103397689	FTZ-F1	nuclear receptor subfamily 5 group A member 2-like
103393976	FTZ-F1	nuclear receptor subfamily 5 group A member 2-like
103396975	FTZ-F1	nuclear receptor subfamily 6 group A member 1-A-like
103390401	gsdf	gonadal somatic cell derived factor
103395234	lgr8	relaxin family peptide receptor 2a
103394489	lhx9	LIM homeobox 9
103387228	pax2a	paired box 2a
103381930	pax2a-like	paired box protein Pax-2a-like
103391002	pdgfrb	platelet-derived growth factor receptor, beta polypeptide
103376894	pgd2	lipocalin-like
103398699	tcf21	transcription factor 21
103396047	ptch2	patched 2
103397246	ptch1	protein patched homolog 1-like
103388664	rspo2	R-spondin 2
103388599	rspo3	R-spondin 3
103393007	sox8	SRY-box transcription factor 8
103392996	sox9a	SRY-box transcription factor 9a
103382384	sox9b	transcription factor Sox-9-A
103394093	srd5a1	steroid-5-alpha-reductase, alpha polypeptide 1
103383286	srd5a2	steroid-5-alpha-reductase, alpha polypeptide 2a
103389588	ddx4	DEAD (Asp-Glu-Ala-Asp) box polypeptide 4
103386287	wnt4a	wingless-type MMTV integration site family, member 4
103388020	wnt4b	wingless-type MMTV integration site family, member 4b
103379534	wt1a	trichohyalin
103379141	wt1b	WT1 transcription factor b
103396601	ZPC1	zona pellucida sperm-binding protein 3-like
103392929	ZPC5	zona pellucida sperm-binding protein 3-like
103388450	tesk1	testis associated actin remodelling kinase 1b
