# Supplementary material for: ceRNA crosstalk mediated by ncRNAs is a novel regulatory mechanism in fish sex determination and differentiation
Source: HighWire-hosted journal article supplement (doi:10.1101/gr.275962.121), 2022-08-01
Supplement: Supplemental_Table_S7.xlsx [file Supplemental_Table_S7.xlsx]

## Sheet: Supplementary Table S7
Table S7. Primers used for circdmrt1/AMSDT/cse-miR-196/gsdf ceRNA network validation.
Primer Name	Primer Sequence 5' -> 3'	Experiment
circdmrt1-DF	CTCTGCCACCTACGTTCCTT	validation for sequence and qRT-PCR
circdmrt1-DR	GTCAGGTAGGAGGTTGCTGG	validation for sequence and qRT-PCR
circdmrt1-CF	CAGATGTCTCATGGTGATGGCTGC	validation for sequence
circdmrt1-CR	GTGGTCTCGGCGTAGTTGTTG	validation for sequence
AMSDT-F	CGGGAGCCGGAgcgggagca	validation for sequence
AMSDT-R	tttttttgagctgtgtttttaatatgatTAAAG	validation for sequence
circdmrt1-S	FAM-ACAACAACTACGCCGAGACCACGGCAGCCT	RNA FISH
AMSDT-S	FAM-CGTGATTGGCTGACTTTGATGGTGACTGTGTATAATTGTGCTGAA	RNA FISH
cse-miR-196FISH-S	CY5-TGGCTCGGCAACAAGAAACTGC	RNA FISH
circdmrt1-AS	FAM-AGGCTGCCGTGGTCTCGGCGTAGTTGTTGT	RNA FISH and Iimmunofluorescence
AMSDT-AS	FAM-TTCAGCACAATTATACACAGTCACCATCAAAGTCAGCCAATCACG	RNA FISH and Iimmunofluorescence
cse-miR-196FISH-AS	CY5-GCAGTTTCTTGTTGCCGAGCCA	RNA FISH
dmrt1-AS	CY5-GCCTTGGGTCAGGTAGGAGGTTGCTGGGTAGTAAGAATGC	RNA FISH
cse-miR-196IF-AS	FAM-GCAGTTTCTTGTTGCCGAGCCA	RNA FISH combined with Iimmunofluorescence
AMSDTcheck-F	CCGCTCGAGAGGAGCAGGACTGGGAGCA	Luciferase Gene Reporter Assay
AMSDTcheck-R	ATAAGAATGCGGCCGCACCCCAACCACATCATCACGA	Luciferase Gene Reporter Assay
circdmrt1check-F	CCGCTCGAGATGTCTCATGGTGATGGCTGC	Luciferase Gene Reporter Assay
circdmrt1check-R	ATAAGAATGCGGCCGCAGGCTGCCGTGGTCT	Luciferase Gene Reporter Assay
gsdfcheck-F	CCGCTCGAGAGATAAAAACTCAGGTTCCCAGG	Luciferase Gene Reporter Assay
gsdfcheck-R	ATAAGAATGCGGCCGCGAGACGCTTTCAAATCAGAAGAAT	Luciferase Gene Reporter Assay
circdmrt1-DF	CTCTGCCACCTACGTTCCTT	Rip assay
circdmrt1-DR	GTCAGGTAGGAGGTTGCTGG	Rip assay
AMSDT-F1	ACCAACGTGTGATTTGACTAT	Rip assay and qRT-PCR
AMSDT-R1	ACATTCTTCAGCACAATTATAC	Rip assay and qRT-PCR
cse-miR-196-F	ACACTCCAGCTGGGTGGCTCGGCAACAAGAAA	RNA pull-down assay and qRT-PCR
cse-miR-196-R	CTCAACTGGTGTCGTGGA	RNA pull-down assay and qRT-PCR
circdmrt13.1-F	CGGGATCCATGTCTCATGGTGATGGCTGC	Overexpression
circdmrt13.1-R	GCCGGCCGAGGCTGCCGTGGTCT	Overexpression
AMSDT3.1-F	cttggtaccgagctcggatccCGGGAGCCGGAGCGGGAG	Overexpression
AMSDT3.1-R	aacgggccctctagactcgagGAGCTGTGTTTTTAATATGATTAAAGTCTAC	Overexpression
gsdfn3-F	cttggtaccgagctcggatccCGGGAGCCGGAGCGGGAG	Overexpression
gsdfn3-R	aacgggccctctagactcgagGAGCTGTGTTTTTAATATGATTAAAGTCTAC	Overexpression
gsdf-F	CACTCCAGGTTCCTTCTGTCTCC	qRT-PCR
gsdf-R	TGTGCTTGCGTTTGTCTTGC	qRT-PCR
18S-F	GGTCTGTGATGCCCTTAGATGTC	qRT-PCR
18S-R	AGTGGGGTTCAGCGGGTTAC	qRT-PCR
u6-F	CGCTTCACGAATTTGCGTG TCAT	qRT-PCR
u6-R	GCTTCGGCAGCACATATAC TAAAAT	qRT-PCR
Actb1-F	GCTGTGCTGTCCCTGTA	qRT-PCR
Actb1-R	GAGTAGCCACGCTCTGTC	qRT-PCR
dmrt1-RT-F	CCGGACGGCTTCGTGTC	qRT-PCR
dmrt1-RT-R	CTTCCACAGGGAGCAGGCAGT	qRT-PCR
