# Supplementary material for: ceRNA crosstalk mediated by ncRNAs is a novel regulatory mechanism in fish sex determination and differentiation
Source: HighWire-hosted journal article supplement (doi:10.1101/gr.275962.121), 2022-08-01
Supplement: Supplemental_Text.docx [file Supplemental_Text.docx]

**Supplementary Materials for**

**CeRNA crosstalk mediated by ncRNAs is a novel regulatory mechanism in fish sex determination and differentiation**

Lili Tang1, 2, Fei Huang3, Wuxin You4, Ansgar Poetsch5, 6, 7, Rafael Henrique Nóbrega8, Deborah Mary Power9, Tengfei Zhu1, 2, Kaiqiang Liu1, 2, Hong-Yan Wang1, 2, Qian Wang1, 2, Xiwen Xu1, 2, Bo Feng1, 2, Manfred Schartl10, 11 *, Changwei Shao1, 2 *

1Key Lab of Sustainable Development of Marine Fisheries, Ministry of Agriculture and Rural Affairs, Yellow Sea Fisheries Research Institute, Chinese Academy of Fishery Sciences, Qingdao, Shandong, 266071, China

2Laboratory for Marine Fisheries Science and Food Production Processes, Pilot National Laboratory for Marine Science and Technology (Qingdao), Qingdao, Shandong, 266237, China

3Genosys, Inc., Shenzhen, Guangdong, 518000, China

4NCU-QMUL Joint Research Institute of Precision Medical Sciences, Queen Mary School, Nanchang University, 1299 Qianhu Avenue, Nanchang, 330036, China

5College of Marine Life Science, Ocean university of China, Qingdao, Shandong, 266003, China

6Laboratory for Marine Biology and Biotechnology, Pilot National Laboratory for Marine Science and Technology (Qingdao), Qingdao, Shandong, 266237, China

7Department of Plant Biochemistry, Ruhr University Bochum, Bochum, North Rhine-Westphalia, 44801, Germany

8Institute of Biosciences Department of Structural and Functional Biology Division Morphology Reproductive and Molecular Biology Group, São Paulo State University, Botucatu, São Paulo, 01049-010, Brazil

9Comparative Endocrinology and Integrative Biology, Centre of Marine Sciences, Universidade do Algarve, Campus de Gambelas, Faro, Algarve, 8005-139, Portugal

10Developmental Biochemistry, Biocenter, University of Würzburg, Würzburg, Bayern, 97074, Germany

11The Xiphophorus Genetic Stock Center, Department of Chemistry and Biochemistry, Texas State University, San Marcos, Texas, TX 78666, USA

*Corresponding authors: [phch1@biozentrum.uni-wuerzburg.de](mailto:phch1@biozentrum.uni-wuerzburg.de), [shaocw@ysfri.ac.cn](mailto:shaocw@ysfri.ac.cn)

**Supplementary Notes**

**The expression of *gsdf* in Ago2 IP fraction of tongue sole testis**

We also determined the expression of *gsdf* in the Ago2 IP fraction of tongue sole testis. The results demonstrated that *gsdf* was significantly enriched in the Ago2 IP fraction compared to the IgG control fractions (Supplemental Fig. S8). It suggests that *gsdf* was medicated in an AGO2-dependent manner in tongue sole testis.

**The conservative analysis of *circdmrt1*, *AMSDT* and cse-miR-196 across teleost**

We performed sequence alignment of *circdmrt1*, *AMSDT* and cse-miR-196 from different teleost fish to show the universality of our findings. The results showed that the sequence of *circdmrt1* and precursor sequence of cse-miR-196 represent high conservation in different fish species (Supplemental Fig. S9). These results suggested that *circdmrt1* may act as ceRNA to interact with cse-miR-196 among different teleost fish. However, the sequence of *AMSDT* was not found in other fish species. It was inferred to be a specific ceRNA in the sex determination and differentiation of tongue sole.

**The significance of *circdmrt1*-mediated posttranscriptional regulation for *gsdf* expression in *vivo***

Since overexpression of *circdmrt1* could rescue cse-miR-196 - mediated suppression of *gsdf* in *vivo* (Fig. 6K), we also tried to rescue the expression of *gsdf* in si-*dmrt1* testis by overexpression of *circdmrt1* to clarify the significance of *circdmrt1*-mediated posttranscriptional regulation in comparison to that of *dmrt1*-dependent transcriptional activation. The results showed lower expression of *gsdf* in the si-*dmrt1* group than in the si-NC group. However, the expression of *gsdf* was significantly up-regulated by the overexpression of *circdmrt1* (*p* < 0.01, Supplemental Fig. S10). This indicates that *circdmrt1*-mediated posttranscriptional regulation of *gsdf* expression is important in the gonad development of tongue sole as the *dmrt1*-dependent transcriptional activation pathway.

**Supplemental methods**

**Processing of small RNA sequencing data**

An analysis pipeline was developed to identify gonadal miRNAs in tongue sole (Supplemental Fig. S1). The detailed pipeline for processing of small RNA sequencing data were referenced to former research (Li et al. 2020).

**Pipeline for lncRNA, circRNA identification**

The analysis procedure for lncRNA and circRNA identification is shown in Supplemental Fig. S1. For predicting novel lncRNA, sequencing reads were first cleaned by removing adaptor sequence and low quality bases with Cutadapt (v 1.10) (Martin 2011). Then the retained high-quality reads were aligned to the [*Cynoglossus semilaevis*](https://www.ncbi.nlm.nih.gov/genome/11788?genome_assembly_id=50672)genome (NCBI, assembly Cse_v1.0) with Hisat2 (v2.0.4). Transcriptome reconstruction was performed to obtain transcripts with better accuracy and integrity using StringTie (v1.0.4), Subsequently, the replicated transcripts in different gonad samples were removed by cuffcompare (v2.1.1) to get a whole transcriptome. In order to obtain the most robust transcripts, a series of filters were then used according to ref. (Prensner et al. 2011). Remaining transcripts were further removed, if the translated ORF contained a protein domain based on a search by HMMER v3.1b2 (Mistry et al. 2013). Finally, the transcripts with no protein-coding potential predicted by lncRNA prediction software (CPC2-beta(Kang et al. 2017), CNCI v2.1 (Sun et al. 2013), FEELnc (Wucher et al. 2017) were classified as candidate novel lncRNAs. For predicting known lncRNA, the transcripts were searched against known lncRNAs in NCBI using Cuffcompare. The lncRNA transcripts that the splice sites were completely congruent between our results and those annotated in NCBI were predicted as known lncRNAs. The CIRI2 (Gao et al. 2015; Gao et al. 2017) and find_circ (Memczak et al. 2013) tools were used to detect and identify the circRNAs using read mapping to the tongue sole genome by BWA-MEM (Li 2013) and STAR (Dobin et al. 2013). The transcripts identified by both find_circ and CIRI2 were considered as candidate circRNA for further analysis.

**Expression analysis**

FPKM values of mRNAs and lncRNA, TPM values of circRNA and RPM values of miRNA were calculated with Cufflinks v2.0.2 (Supplemental Fig. S1). To detect differentially expressed loci, the read counts of mRNA, lncRNA and miRNA were calculated by HTSeq (v0.9.1) (Anders et al. 2015) (Supplemental Fig. S1). The back-spliced reads of circRNA were counted by find_circ (Nicolet et al. 2018). To analyze the differential expression, the R package DESeq2 (v1.4.5) was used on the basis of the reads counts and the produced *p*-values were adjusted by Benjamini and Hochberg’s methods to control the false discovery rate (Yang et al. 2016; Nicolet et al. 2018). LncRNAs, mRNAs and miRNAs with adjusted *p*-value < 0.01 and 2-fold change were considered differentially expressed while circRNAs with adjusted *p*-value < 0.05 and 1.5-fold change were considered differentially expressed.

**Sample clustering based on the expression of lncRNAs, circRNAs, miRNAs and mRNAs**

The graphical representations of lncRNA, circRNA, miRNA, and mRNA expression profiles of gonad samples were performed by PCA analysis, which was done with STATISTICA software (StatSoft Inc., Tulsa, OK). Missing values was computed by the k-nearest neighbor method.

**MiRNA target prediction**

The miRNA binding sites in lncRNAs, circRNAs and the mRNAs were predicted using miRanda (v3.3a), filtered and modified according to Yu-Chan Zhang (Wu et al. 2013; Zhang et al. 2014).

**Construction of lncRNA/circRNA-miRNA-mRNA ceRNA networks**

According to the competing endogenous RNA hypothesis, lncRNA (circRNA) can directly interact with miRNAs and prevent them from binding with mRNAs thereby acting as the functional microRNA ‘sponge’ (Liu et al. 2013). Based on the mRNA-miRNA, lncRNA-miRNA, and circRNA-miRNA interactions predicted by miRanda, the probability of ceRNA-ceRNA pairs was calculated using a hypergeometric distribution (Liu et al. 2013; Das et al. 2014) and adjusted by false discovery rate（FDR）with threshold of 0.01 (Benjamini and Hochberg 1995) (Supplemental Fig. S1). 48 known sex-determination-related genes were selected from the above lncRNA/circRNA-miRNA-mRNA networks and their ceRNA networks were constructed on the basis of the ceRNA-ceRNA pairs with *p*-value <0.05. Cytoscape (v3.[8.2](https://www.spandidos-publications.com/10.3892/ijo.2016.3716#b30-ijo-49-05-2023)) was performed to visualize the ceRNA networks.

**References**

Anders S, Pyl PT, Huber W. 2015. HTSeq—a Python framework to work with high-throughput sequencing data. *Bioinformatics* **31**: 166-169. doi: 10.1093/bioinformatics/btu638.

Benjamini Y, Hochberg Y. 1995. Controlling the false discovery rate: a practical and powerful approach to multiple testing. *Journal of the Royal statistical society: series B (Methodological)* **57**: 289-300. doi: 10.1111/j.2517-6161. 1995. tb02031. x.

Das S, Ghosal S, Sen R, Chakrabarti J. 2014. lnCeDB: database of human long noncoding RNA acting as competing endogenous RNA. *PloS one* **9**: e98965. doi: 10.1371/journal.pone.0098965.

Dobin A, Davis CA, Schlesinger F, Drenkow J, Zaleski C, Jha S, Batut P, Chaisson M, Gingeras TR. 2013. STAR: ultrafast universal RNA-seq aligner. *Bioinformatics (Oxford, England)* **29**: 15-21. doi: 10.1093/bioinformatics/bts635.

Gao Y, Wang J, Zhao F. 2015. CIRI: an efficient and unbiased algorithm for de novo circular RNA identification. *Genome biology* **16**: 4. doi: 10.1186/s13059-014-0571-3.

Gao Y, Zhang J, Zhao F. 2017. Circular RNA identification based on multiple seed matching. *Briefings in bioinformatics* **19**: 803-810. doi: 10.1093/bib/bbx014.

Kang Y-J, Yang D-C, Kong L, Hou M, Meng Y-Q, Wei L, Gao G. 2017. CPC2: a fast and accurate coding potential calculator based on sequence intrinsic features. *Nucleic acids research* **45**: W12-W16. doi: 10.1093/nar/gkx428.

Li C, Xiong T, Zhou M, Wan L, Xi S, Liu Q, Chen Y, Mao H, Liu S, Chen B. 2020. Characterization of microRNAs during Embryonic Skeletal Muscle Development in the Shan Ma Duck. *Animals* **10**: 1417. doi: 10.3390/ani10081417.

Li H. 2013. Aligning sequence reads, clone sequences and assembly contigs with BWA-MEM. *arXiv: Genomics*. doi: 10.6084/M9. FIGSHARE. 963153. V1.

Liu K, Yan Z, Li Y, Sun Z. 2013. Linc2GO: a human LincRNA function annotation resource based on ceRNA hypothesis. *Bioinformatics* **29**: 2221-2222. doi: 10.1093/bioinformatics/btt361.

Martin M. 2011. Cutadapt removes adapter sequences from high-throughput sequencing reads. *EMBnet journal* **17**: 10-12. doi: 10.1089/cmb.2017.0096.

Memczak S, Jens M, Elefsinioti A, Torti F, Krueger J, Rybak A, Maier L, Mackowiak SD, Gregersen LH, Munschauer M. 2013. Circular RNAs are a large class of animal RNAs with regulatory potency. *Nature* **495**: 333-338. doi: 10.1038/nature11928.

Mistry J, Finn RD, Eddy SR, Bateman A, Punta M. 2013. Challenges in homology search: HMMER3 and convergent evolution of coiled-coil regions. *Nucleic acids research* **41**: e121-e121. doi: 10.1093/nar/gkt263.

Nicolet BP, Engels S, Aglialoro F, van den Akker E, von Lindern M, Wolkers MC. 2018. Circular RNA expression in human hematopoietic cells is widespread and cell-type specific. *Nucleic acids research* **46**: 8168-8180. doi: 10.1093/nar/gky721.

Prensner JR, Iyer MK, Balbin OA, Dhanasekaran SM, Cao Q, Brenner JC, Laxman B, Asangani IA, Grasso CS, Kominsky HD. 2011. Transcriptome sequencing across a prostate cancer cohort identifies PCAT-1, an unannotated lincRNA implicated in disease progression. *Nature biotechnology* **29**: 742. doi: 10.1038/nbt.1914.

Sun L, Luo H, Bu D, Zhao G, Yu K, Zhang C, Liu Y, Chen R, Zhao Y. 2013. Utilizing sequence intrinsic composition to classify protein-coding and long non-coding transcripts. *Nucleic acids research* **41**: e166-e166. doi: 10.1093/nar/gkt646.

Wu H-J, Wang Z-M, Wang M, Wang X-J. 2013. Widespread long noncoding RNAs as endogenous target mimics for microRNAs in plants. *Plant physiology* **161**: 1875-1884. doi: 10.1104/pp.113.215962.

Wucher V, Legeai F, Hédan B, Rizk G, Lagoutte L, Leeb T, Jagannathan V, Cadieu E, David A, Lohi H et al. 2017. FEELnc: a tool for long non-coding RNA annotation and its application to the dog transcriptome. *Nucleic Acids Research* **45**: e57-e57. doi: 10.1093/nar/gkw1306.

Yang R, Huang F, Fu J, Dou B, Xu B, Miao L, Liu W, Yang X, Tan C, Chen H. 2016. Differential transcription profiles of long non-coding RNAs in primary human brain microvascular endothelial cells in response to meningitic Escherichia coli. *Scientific reports* **6**: 38903. doi: 10.1038/srep38903.

Zhang Y-C, Liao J-Y, Li Z-Y, Yu Y, Zhang J-P, Li Q-F, Qu L-H, Shu W-S, Chen Y-Q. 2014. Genome-wide screening and functional analysis identify a large number of long noncoding RNAs involved in the sexual reproduction of rice. *Genome biology* **15**: 512. doi: 10.1186/s13059-014-0512-1.
